# Supplementary material for: Comparative Proteomic Profiling Reveals Molecular Characteristics Associated with Oogenesis and Oocyte Maturation during Ovarian Development of Bactrocera dorsalis (Hendel)
Source: MDPI journal article supplement (doi:10.3390/ijms18071379), 2017-06-30
Supplement: s1 [file s1]

# Comparative Proteomic Profiling Reveals Molecular Characteristics Associated with Oogenesis and Oocyte Maturation during Ovarian Development of *Bactrocera dorsalis* (Hendel)

Dong Wei , Ran Li , Meng-Yi Zhang , Yu-Wei Liu , Zheng Zhang , Guy Smagghe and Jin-Jun Wang

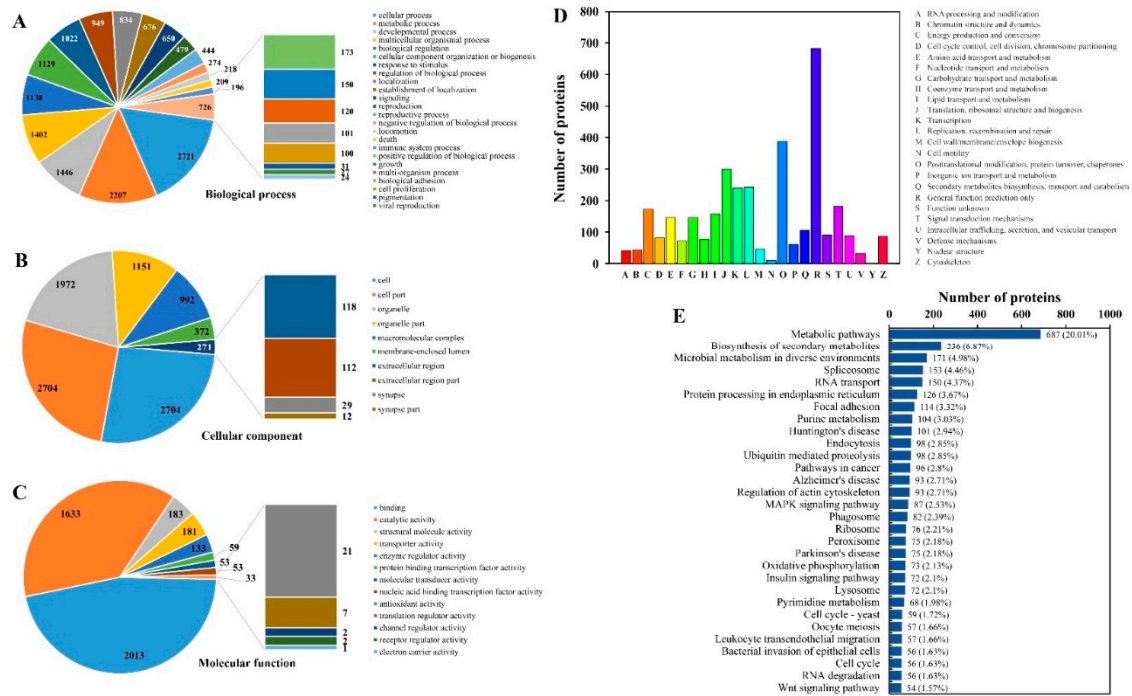

**Figure S1.** Functional annotation of proteins identified in *Bactrocera dorsalis* ovary. Gene Ontology analysis showed three ontologies were analyzed including biological process (A), cellular component (B) and molecular function (C); Cluster of Orthologous Groups of proteins (D); Top 30 pathways with highest protein number as determined by Kyoto Encyclopedia of Gene and Genomes analysis.

**Table S1.** Proteins differentially expressed between 1- and 6-day-old ovaries of *Bactrocera dorsalis*.

| Accession Number | Annotation                                                   | Protein Mass | Protein Length | Sequence Coverage | Peptides | Fold Change | Difference |
|------------------|--------------------------------------------------------------|--------------|----------------|-------------------|----------|-------------|------------|
| A0A034WHP3       | Vitelline membrane protein Vm26Aa                            | 11467        | 114            | 82.46             | 16       | 35.99       | up         |
| A0A034WY57       | Putative ATP-dependent RNA helicase me31b                    | 51888        | 457            | 77.46             | 46       | 29.41       | up         |
| A0A034V9A3       | CUGBP Elav-like family member 2                              | 62542        | 587            | 25.55             | 13       | 29.06       | up         |
| A0A034WSR6       | Defective chorion-1 protein (Fragment)                       | 79162        | 723            | 28.49             | 25       | 27.31       | up         |
| A0A034VQJ3       | Vitellogenin-1                                               | 47853        | 436            | 83.26             | 82       | 26.95       | up         |
| A0A034WRE4       | 60S ribosomal protein L30                                    | 12248        | 111            | 60.36             | 9        | 26.93       | up         |
| A0A034WWC1       | General odorant-binding protein 99b                          | 16792        | 143            | 49.65             | 10       | 26.43       | up         |
| Q8T7E3           | Vitellogenin 1                                               | 47781        | 436            | 83.26             | 77       | 23.51       | up         |
| A0A034VP94       | 40S ribosomal protein S12                                    | 15218        | 139            | 84.17             | 16       | 22.03       | up         |
| A0A034W432       | Cytochrome P450 306a1                                        | 63391        | 545            | 40.92             | 19       | 20.86       | up         |
| A0A034V196       | Protein disulfide-isomerase                                  | 15091        | 135            | 51.85             | 6        | 20.18       | up         |
| A0A034WNR3       | 46 kDa FK506-binding nuclear protein (Fragment)              | 20602        | 180            | 28.89             | 4        | 19.46       | up         |
| A0A034WDZ9       | Importin-5                                                   | 123792       | 1106           | 53.35             | 47       | 18.40       | up         |
| A0A034W366       | Guanine nucleotide-binding protein subunit beta-like protein | 35592        | 318            | 79.87             | 26       | 17.92       | up         |
| A0A034W6L5       | Importin-7                                                   | 119886       | 1048           | 37.6              | 31       | 17.87       | up         |
| A0A034WM43       | Defective chorion-1 protein, FC125 isoform (Fragment)        | 55679        | 506            | 31.42             | 13       | 17.64       | up         |
| A0A034VSG4       | Maternal protein exuperantia                                 | 55182        | 495            | 51.11             | 26       | 17.00       | up         |
| A0A034VFB2       | 6-phosphogluconate dehydrogenase, decarboxylating            | 52780        | 481            | 63.2              | 27       | 16.85       | up         |
| A7YVH6           | Cytochrome b                                                 | 43024        | 378            | 2.38              | 1        | 16.66       | up         |
| A0A034WW15       | 40S ribosomal protein S3                                     | 27365        | 244            | 80.33             | 26       | 16.58       | up         |
| A0A034VTT0       | Transketolase-like protein 2 (Fragment)                      | 21534        | 202            | 64.85             | 10       | 16.36       | up         |
| A0A034VPT4       | 40S ribosomal protein S6                                     | 28294        | 248            | 48.79             | 17       | 15.92       | up         |
| A0A034VWK2       | 60S ribosomal protein L14                                    | 19353        | 166            | 44.58             | 12       | 15.79       | up         |
| IISWI8           | Heat shock protein 60                                        | 61054        | 573            | 77.66             | 47       | 15.44       | up         |
| A0A034V6V9       | Importin-4                                                   | 120939       | 1087           | 42.23             | 40       | 14.62       | up         |
| A0A034VJ67       | Protein cup (Fragment)                                       | 127850       | 1173           | 22.25             | 24       | 14.35       | up         |

|            |                                                      |        |      |       |    |       |    |
|------------|------------------------------------------------------|--------|------|-------|----|-------|----|
| A0A034WK63 | 40S ribosomal protein S8 (Fragment)                  | 25654  | 222  | 45.95 | 14 | 13.86 | up |
| A0A034V1V6 | Peroxisedoxin-5, mitochondrial                       | 19883  | 186  | 78.49 | 16 | 13.13 | up |
| A0A034VV64 | Eukaryotic translation initiation factor 3 subunit A | 132786 | 1126 | 34.46 | 37 | 13.06 | up |
| A0A034VE18 | Heat shock protein 23                                | 18967  | 170  | 78.82 | 15 | 12.97 | up |
| A0A034VR21 | Protein bicaudal C                                   | 98705  | 899  | 26.25 | 15 | 12.51 | up |
| A0A034VXK9 | Aspartate aminotransferase (Fragment)                | 42034  | 376  | 76.86 | 26 | 12.49 | up |
| A0A034VGT6 | Eukaryotic translation initiation factor 5           | 51176  | 461  | 33.62 | 15 | 12.46 | up |
| A0A034W5H1 | 60S ribosomal protein L23 (Fragment)                 | 15903  | 149  | 65.77 | 13 | 12.44 | up |
| A0A034VHY0 | Uncharacterized protein (Fragment)                   | 70311  | 662  | 26.89 | 10 | 12.33 | up |
| A0A034VED9 | UPF0586 protein CG11596                              | 50004  | 435  | 13.1  | 6  | 12.01 | up |
| A0A034VZV8 | Chorion peroxidase                                   | 94126  | 836  | 40.31 | 29 | 12.00 | up |
| A0A034V1Z6 | Valine--tRNA ligase                                  | 120041 | 1054 | 39.75 | 36 | 11.94 | up |
| A0A034VMA5 | ATP-binding cassette sub-family F member 2           | 69942  | 610  | 27.7  | 17 | 11.71 | up |
| A0A034VAV1 | Proactivator polypeptide                             | 107020 | 960  | 17.92 | 16 | 11.64 | up |
| A0A034W4L6 | Lipid storage droplets surface-binding protein 2     | 37989  | 353  | 61.47 | 20 | 11.61 | up |
| A0A034VN85 | Eukaryotic translation initiation factor 3 subunit E | 50964  | 434  | 38.71 | 15 | 11.54 | up |
| A0A034WBX6 | Eukaryotic translation initiation factor 3 subunit L | 63113  | 538  | 28.81 | 14 | 11.49 | up |
| A0A034WLA5 | ATP-dependent RNA helicase vasa, isoform A           | 67940  | 621  | 57.49 | 35 | 11.45 | up |
| A0A034W0T2 | Inosine-5'-monophosphate dehydrogenase               | 57498  | 534  | 35.96 | 12 | 11.42 | up |
| A0A034W2M7 | Elongation factor 1-gamma (Fragment)                 | 49900  | 438  | 58.68 | 31 | 11.41 | up |
| A0A034VAY0 | 40S ribosomal protein S3a (Fragment)                 | 30469  | 269  | 71    | 24 | 11.40 | up |
| A0A034V5W7 | Methyltransferase-like protein 23                    | 30225  | 276  | 18.48 | 5  | 11.34 | up |
| A0A034VY08 | S-adenosylmethionine synthase                        | 44908  | 409  | 49.14 | 15 | 11.30 | up |
| A0A034WL43 | Putative arginine--tRNA ligase, cytoplasmic          | 76511  | 682  | 49.27 | 31 | 11.17 | up |
| A0A034WB81 | T-complex protein 1 subunit gamma                    | 59276  | 543  | 71.27 | 41 | 10.98 | up |
| A0A034WWD8 | Exportin-1                                           | 123439 | 1070 | 40.56 | 37 | 10.85 | up |
| A0A034W812 | Importin subunit alpha                               | 57164  | 520  | 63.65 | 22 | 10.77 | up |

|            |                                                                    |        |      |       |    |       |    |
|------------|--------------------------------------------------------------------|--------|------|-------|----|-------|----|
| A0A034V8K3 | RING finger protein 17 (Fragment)                                  | 76371  | 675  | 34.81 | 17 | 10.68 | up |
| A0A034WFM3 | 60S ribosomal protein L3                                           | 46663  | 413  | 50.36 | 26 | 10.66 | up |
| A0A034WNG6 | Alanine--tRNA ligase, cytoplasmic                                  | 108265 | 967  | 50.26 | 38 | 10.57 | up |
| A0A034VX78 | T-complex protein 1 subunit theta                                  | 59247  | 546  | 60.26 | 31 | 10.55 | up |
| A0A034UZ33 | Importin subunit beta                                              | 98887  | 885  | 37.51 | 26 | 10.39 | up |
| A0A034WKN9 | C2 domain-containing protein 3 (Fragment)                          | 75399  | 682  | 33.43 | 14 | 10.37 | up |
| A0A034WMJ8 | 40S ribosomal protein S4 (Fragment)                                | 31529  | 280  | 59.29 | 23 | 10.35 | up |
| A0A034WL96 | 60S ribosomal protein L13                                          | 25137  | 216  | 39.81 | 13 | 10.27 | up |
| A0A034VA13 | Eukaryotic initiation factor 4A                                    | 45755  | 403  | 67    | 28 | 10.20 | up |
| A0A034W486 | Protein transport protein Sec61 subunit alpha isoform 2 (Fragment) | 37285  | 340  | 20.29 | 7  | 10.07 | up |
| A0A034WNL1 | ADP,ATP carrier protein                                            | 33080  | 302  | 73.51 | 27 | 10.05 | up |
| A0A034WBZ8 | Putative serine protease K12H4.7                                   | 59035  | 517  | 39.65 | 19 | 10.02 | up |
| A0A034WJW9 | 26S proteasome non-ATPase regulatory subunit 5                     | 56937  | 499  | 19.24 | 9  | 10.01 | up |
| A0A034WT35 | Uncharacterized protein                                            | 107757 | 923  | 22.1  | 17 | 10.01 | up |
| A0A034VN45 | 60S ribosomal protein L4                                           | 46425  | 411  | 57.91 | 28 | 10.00 | up |
| A0A034V6H0 | Serine protease nudel (Fragment)                                   | 205363 | 1841 | 19.72 | 28 | 9.87  | up |
| A0A034VXX3 | Uncharacterized protein                                            | 38416  | 353  | 40.51 | 10 | 9.87  | up |
| A0A034VCB2 | 60S ribosomal protein L12 (Fragment)                               | 21090  | 196  | 52.55 | 8  | 9.85  | up |
| A0A034VGJ1 | Clustered mitochondria protein homolog                             | 153417 | 1362 | 30.54 | 35 | 9.85  | up |
| A0A034V813 | Acetyl-CoA carboxylase                                             | 270348 | 2391 | 34.84 | 58 | 9.80  | up |
| A0A034VUK5 | Proliferation-associated protein 2G4                               | 44175  | 403  | 79.9  | 29 | 9.71  | up |
| A0A034WGZ4 | Elongation factor Ts, mitochondrial                                | 33818  | 305  | 40.66 | 9  | 9.68  | up |
| A0A034VEP1 | Exportin-5                                                         | 43240  | 388  | 18.56 | 5  | 9.67  | up |
| K9LCM4     | Cytochrome P450 (Fragment)                                         | 26153  | 226  | 15.04 | 3  | 9.61  | up |
| A0A034WRF7 | D-3-phosphoglycerate dehydrogenase                                 | 35346  | 334  | 53.29 | 17 | 9.49  | up |
| A0A034W7B3 | Uncharacterized protein                                            | 45156  | 395  | 40.25 | 15 | 9.49  | up |
| X2JR29     | Ribosomal protein L19                                              | 24335  | 205  | 32.68 | 11 | 9.42  | up |
| A0A034WNB0 | 26S proteasome non-ATPase regulatory subunit 12 (Fragment)         | 60837  | 531  | 33.71 | 21 | 9.38  | up |
| A0A034WGD2 | Ribosomal L1 domain-containing protein CG13096 (Fragment)          | 68771  | 608  | 32.07 | 18 | 9.37  | up |
| A0A034VXE8 | Uncharacterized protein                                            | 27095  | 242  | 35.12 | 6  | 9.33  | up |

|            |                                                                       |        |      |       |    |      |    |
|------------|-----------------------------------------------------------------------|--------|------|-------|----|------|----|
| A0A034WGD6 | Protein zwilch                                                        | 73614  | 646  | 18.27 | 10 | 9.31 | up |
| A0A034VUT0 | Protein singed (Fragment)                                             | 56975  | 509  | 31.43 | 13 | 9.29 | up |
| A0A034VYI4 | Tyrosine--tRNA ligase (Fragment)                                      | 58023  | 523  | 65.01 | 29 | 9.25 | up |
| A0A034W3H8 | T-complex protein 1 subunit epsilon                                   | 58973  | 540  | 61.67 | 28 | 9.24 | up |
| A0A034VZW3 | Transitional endoplasmic reticulum ATPase TER94                       | 88721  | 799  | 65.08 | 52 | 9.20 | up |
| A0A034VUQ7 | Glucose-6-phosphate 1-dehydrogenase                                   | 60835  | 527  | 52.56 | 22 | 9.14 | up |
| A0A034V9B8 | Putative cytochrome P450 6a14                                         | 55942  | 490  | 49.8  | 22 | 9.10 | up |
| A0A034WJ52 | Eukaryotic translation initiation factor 4 gamma 1                    | 195326 | 1766 | 36.98 | 46 | 9.09 | up |
| A0A034WQL2 | 60S ribosomal protein L27a                                            | 17047  | 149  | 46.31 | 10 | 9.07 | up |
| A0A034WG46 | ATP synthase subunit b, mitochondrial                                 | 27344  | 240  | 47.08 | 15 | 9.03 | up |
| A0A034VLP4 | Transforming growth factor-beta-induced protein ig-h3                 | 89994  | 810  | 44.69 | 28 | 9.02 | up |
| A0A034VG22 | RING finger protein 17 (Fragment)                                     | 60868  | 530  | 58.3  | 27 | 9.01 | up |
| A0A034WIU2 | Trypsin (Fragment)                                                    | 25933  | 249  | 31.33 | 7  | 9.00 | up |
| A0A034WCS4 | Dehydrogenase/reductase SDR family member 11                          | 27759  | 251  | 57.77 | 8  | 8.92 | up |
| A0A034VH20 | Piwi-like protein                                                     | 102440 | 900  | 49.56 | 37 | 8.88 | up |
| A0A034W6G9 | Troponin C-akin-1 protein                                             | 18719  | 166  | 68.07 | 8  | 8.88 | up |
| A0A034WQB6 | Putative elongation factor 1-beta                                     | 24244  | 222  | 73.87 | 18 | 8.86 | up |
| A0A034WVH2 | Protein arginine N-methyltransferase 1                                | 42277  | 366  | 51.37 | 18 | 8.79 | up |
| A0A034W1W8 | Aminoacyl tRNA synthase complex-interacting multifunctional protein 1 | 34730  | 318  | 32.7  | 9  | 8.62 | up |
| A0A034V4Z0 | Uncharacterized protein                                               | 213808 | 1884 | 10.35 | 18 | 8.62 | up |
| A0A034W0G5 | Eukaryotic translation initiation factor 3 subunit B                  | 80496  | 689  | 42.24 | 28 | 8.55 | up |
| A0A034W3A2 | Serine--tRNA ligase, cytoplasmic                                      | 56415  | 497  | 49.09 | 17 | 8.51 | up |
| A0A034WPR9 | Asparagine synthetase                                                 | 63212  | 557  | 11.85 | 6  | 8.49 | up |
| A0A034WVX5 | 60S ribosomal protein L9                                              | 21321  | 190  | 60    | 9  | 8.38 | up |
| A0A034V7V4 | Uncharacterized protein (Fragment)                                    | 123947 | 1092 | 18.5  | 16 | 8.38 | up |
| A0A034VC07 | Thioredoxin reductase 1, mitochondrial                                | 53451  | 493  | 71.4  | 28 | 8.14 | up |
| A0A034VGU8 | Eukaryotic translation initiation factor 2 subunit 3                  | 51705  | 475  | 45.68 | 16 | 8.09 | up |
| A0A034VLR1 | 40S ribosomal protein S10b (Fragment)                                 | 17968  | 159  | 58.49 | 15 | 8.04 | up |

|            |                                                                 |        |      |       |    |      |    |
|------------|-----------------------------------------------------------------|--------|------|-------|----|------|----|
| A0A034W1V3 | Diphthine synthase                                              | 31790  | 280  | 47.14 | 9  | 8.00 | up |
| A0A034VUM4 | Protein extra bases (Fragment)                                  | 48866  | 420  | 46.19 | 23 | 8.00 | up |
| A0A034VS73 | Transketolase-like protein 2 (Fragment)                         | 47536  | 434  | 74.19 | 29 | 7.98 | up |
| A0A034V4V7 | HEAT repeat-containing protein 1-like protein (Fragment)        | 73677  | 651  | 11.67 | 7  | 7.94 | up |
| A0A034WXR5 | Ribosomal protein                                               | 24492  | 217  | 46.08 | 12 | 7.90 | up |
| A0A034WEB5 | T-complex protein 1 subunit alpha                               | 59549  | 557  | 56.55 | 28 | 7.85 | up |
| A0A034VDY8 | Bifunctional glutamate/proline--tRNA ligase                     | 185312 | 1636 | 48.66 | 65 | 7.80 | up |
| A0A034WFZ2 | Uncharacterized protein                                         | 29640  | 256  | 45.31 | 9  | 7.79 | up |
| A0A034VPD5 | Villin-like protein quail                                       | 103012 | 895  | 18.21 | 13 | 7.68 | up |
| A0A034V085 | Proteasome-associated protein ECM29-like protein                | 212089 | 1889 | 26.95 | 41 | 7.64 | up |
| A0A034VUE9 | 40S ribosomal protein SA                                        | 30293  | 271  | 78.97 | 20 | 7.63 | up |
| A0A034W0V2 | Cystathionine beta-synthase                                     | 56287  | 515  | 13.4  | 6  | 7.60 | up |
| A0A034VJX9 | Mitochondrial-processing peptidase subunit beta                 | 52467  | 472  | 58.47 | 22 | 7.59 | up |
| A0A034WRN7 | T-complex protein 1 subunit delta                               | 57179  | 533  | 51.59 | 22 | 7.58 | up |
| A0A034WAB1 | Polyadenylate-binding protein                                   | 71344  | 649  | 63.17 | 38 | 7.52 | up |
| A0A034VGS8 | Tubulin beta-3 chain                                            | 50889  | 454  | 60.79 | 27 | 7.51 | up |
| A0A034WL41 | Eukaryotic translation initiation factor 3 subunit I            | 36174  | 326  | 58.28 | 14 | 7.49 | up |
| A0A034WLZ1 | Nascent polypeptide-associated complex subunit alpha (Fragment) | 25683  | 238  | 38.66 | 12 | 7.45 | up |
| A0A034VUA6 | 26S proteasome non-ATPase regulatory subunit 1                  | 112769 | 1017 | 52.51 | 45 | 7.42 | up |
| A0A034VPR3 | Elongation factor Tu GTP-binding domain-containing protein 1    | 116814 | 1043 | 31.06 | 28 | 7.36 | up |
| A0A034VRS1 | Isocitrate dehydrogenase [NAD] subunit, mitochondrial           | 38533  | 354  | 56.78 | 19 | 7.35 | up |
| A0A034V5U3 | Staphylococcal nuclease domain-containing protein 1             | 103711 | 928  | 64.12 | 47 | 7.34 | up |
| A0A034VRE9 | 40S ribosomal protein S15a                                      | 14758  | 130  | 60    | 9  | 7.27 | up |
| A0A034VB23 | RRP12-like protein                                              | 154813 | 1385 | 12.92 | 16 | 7.27 | up |
| A0A034WQX9 | Leucine-rich repeat-containing protein 59                       | 35882  | 318  | 33.02 | 9  | 7.26 | up |

|            |                                                                      |        |      |       |    |      |    |
|------------|----------------------------------------------------------------------|--------|------|-------|----|------|----|
| A0A034WMX5 | 60S ribosomal protein L44                                            | 12489  | 104  | 20.19 | 3  | 7.25 | up |
| A0A034VHM0 | cAMP-dependent protein kinase type I regulatory subunit              | 35904  | 322  | 35.09 | 9  | 7.24 | up |
| A0A034VFE1 | NADH dehydrogenase (Ubiquinone) iron-sulfur protein 3, mitochondrial | 30290  | 264  | 59.47 | 14 | 7.24 | up |
| A0A034V3P5 | Uncharacterized protein (Fragment)                                   | 114127 | 1011 | 15.03 | 11 | 7.23 | up |
| A0A034VX01 | DNA-binding protein modulo (Fragment)                                | 65113  | 578  | 37.89 | 22 | 7.20 | up |
| A0A034V7H3 | Niemann-Pick C1 protein (Fragment)                                   | 118447 | 1061 | 14.42 | 13 | 7.15 | up |
| A0A034WTE1 | Eukaryotic translation initiation factor 3 subunit M (Fragment)      | 46503  | 410  | 50.98 | 17 | 7.14 | up |
| A0A034W9W1 | Eukaryotic translation initiation factor 3 subunit H (Fragment)      | 38552  | 338  | 49.41 | 15 | 7.11 | up |
| A0A034UZF8 | Uncharacterized protein (Fragment)                                   | 150148 | 1341 | 6.26  | 8  | 7.11 | up |
| A0A034VW82 | 1,4-alpha-glucan-branching enzyme                                    | 79824  | 689  | 47.61 | 26 | 6.99 | up |
| A0A034WE93 | Glycine--tRNA ligase                                                 | 76602  | 679  | 50.07 | 31 | 6.98 | up |
| A0A034VKS3 | Threonine--tRNA ligase, cytoplasmic                                  | 79257  | 689  | 60.09 | 35 | 6.93 | up |
| A0A034V173 | Putative N-acetyltransferase san                                     | 21206  | 186  | 50.54 | 10 | 6.88 | up |
| A0A034WPA4 | 28S ribosomal protein S35, mitochondrial                             | 38291  | 332  | 31.02 | 8  | 6.87 | up |
| A0A034W163 | Xanthine dehydrogenase (Fragment)                                    | 143901 | 1298 | 19.95 | 21 | 6.86 | up |
| A0A034UZI7 | Midasin (Fragment)                                                   | 430710 | 3762 | 6.01  | 20 | 6.76 | up |
| A0A034VMS2 | Peptide methionine sulfoxide reductase                               | 27545  | 243  | 29.63 | 6  | 6.68 | up |
| A0A034V1D4 | CAD protein (Fragment)                                               | 111533 | 999  | 28.43 | 25 | 6.61 | up |
| A0A034W5K7 | Putative phenylalanine--tRNA ligase beta subunit                     | 66264  | 591  | 43.82 | 21 | 6.61 | up |
| A0A034VEZ1 | Glutamate synthase (NADH), amyloplastic                              | 230930 | 2093 | 43.91 | 77 | 6.50 | up |
| A0A034WLE7 | T-complex protein 1 subunit beta                                     | 57934  | 535  | 62.99 | 33 | 6.50 | up |
| A0A034W9X8 | E3 ubiquitin-protein ligase HECTD1                                   | 315089 | 2883 | 7.49  | 18 | 6.45 | up |
| A0A034WAN3 | Eukaryotic peptide chain release factor subunit 1                    | 49005  | 437  | 29.98 | 12 | 6.45 | up |
| A0A034WKN7 | Methyltransferase-like protein 13                                    | 76261  | 675  | 33.63 | 19 | 6.45 | up |
| A0A034WID4 | Putative cation-transporting ATPase 13A1                             | 136813 | 1216 | 18.67 | 19 | 6.44 | up |
| A0A034W4W3 | Transportin-1                                                        | 100645 | 886  | 27.2  | 18 | 6.40 | up |

|            |                                                                                |        |      |       |    |      |    |
|------------|--------------------------------------------------------------------------------|--------|------|-------|----|------|----|
| A0A034VMZ5 | T-complex protein 1 subunit eta                                                | 59276  | 543  | 72.56 | 32 | 6.37 | up |
| A0A034V225 | Extracellular serine/threonine protein kinase FAM20C                           | 61379  | 541  | 15.9  | 6  | 6.36 | up |
| A0A034VA47 | Uncharacterized protein (Fragment)                                             | 96787  | 853  | 21.81 | 18 | 6.36 | up |
| A0A034VWI5 | Leucine-rich PPR motif-containing protein, mitochondrial (Fragment)            | 159347 | 1418 | 43.86 | 50 | 6.35 | up |
| A0A034WM27 | Tubulin--tyrosine ligase-like protein 12                                       | 74892  | 641  | 29.49 | 17 | 6.28 | up |
| A0A034V651 | Sortilin-related receptor (Fragment)                                           | 61745  | 553  | 21.52 | 11 | 6.24 | up |
| I6MC53     | Heat shock protein 90                                                          | 81750  | 715  | 55.8  | 49 | 6.23 | up |
| A0A034WMH5 | 26S proteasome non-ATPase regulatory subunit 13                                | 43727  | 382  | 47.64 | 20 | 6.22 | up |
| A0A034WKN2 | Putative aminoacyl tRNA synthase complex-interacting multifunctional protein 2 | 33483  | 296  | 38.85 | 11 | 6.20 | up |
| A0A034VBA8 | Isoleucine--tRNA ligase, cytoplasmic (Fragment)                                | 53686  | 468  | 38.46 | 16 | 6.16 | up |
| A0A034VG52 | Adenosylhomocysteinase                                                         | 56004  | 509  | 53.24 | 23 | 6.14 | up |
| A0A034WM52 | Cullin-associated NEDD8-dissociated protein 1                                  | 139107 | 1236 | 39.56 | 41 | 6.03 | up |
| A0A034W3T2 | Serine/threonine-protein phosphatase 5                                         | 61618  | 544  | 40.26 | 19 | 6.02 | up |
| A0A034VRQ0 | Translational activator GCN1 (Fragment)                                        | 161957 | 1471 | 34.81 | 39 | 5.98 | up |
| A0A034V598 | Coatomer subunit gamma                                                         | 97386  | 877  | 47.09 | 29 | 5.96 | up |
| A0A034VUY6 | Methenyltetrahydrofolate synthase domain-containing protein                    | 59463  | 538  | 56.51 | 32 | 5.91 | up |
| A0A034WCI6 | E3 UFM1-protein ligase 1-like protein (Fragment)                               | 83853  | 744  | 34.01 | 22 | 5.90 | up |
| A0A034VMW4 | Uridine 5'-monophosphate synthase                                              | 53209  | 487  | 49.08 | 20 | 5.90 | up |
| A0A034VRE6 | Adenosylhomocysteinase                                                         | 47406  | 431  | 39.91 | 19 | 5.89 | up |
| A0A034VC08 | Xaa-Pro dipeptidase                                                            | 53654  | 480  | 42.29 | 18 | 5.88 | up |
| A0A034WF61 | Serine/threonine-protein phosphatase                                           | 34736  | 303  | 36.96 | 9  | 5.86 | up |
| A0A034W9M9 | Cytosolic 10-formyltetrahydrofolate dehydrogenase (Fragment)                   | 25559  | 231  | 47.19 | 9  | 5.84 | up |
| A0A034UZ41 | Sepiapterin reductase                                                          | 29503  | 263  | 50.57 | 10 | 5.82 | up |
| A0A034VE03 | ATP-binding cassette sub-family E member 1                                     | 69344  | 611  | 36.66 | 19 | 5.81 | up |



|            |                                                                      |        |      |       |    |      |    |
|------------|----------------------------------------------------------------------|--------|------|-------|----|------|----|
| A0A034V3I0 | CAD protein (Fragment)                                               | 136404 | 1234 | 20.83 | 17 | 5.81 | up |
| A0A034W9S7 | ATP synthase subunit O, mitochondrial (Fragment)                     | 24333  | 225  | 68    | 18 | 5.75 | up |
| A0A034WEU3 | Enoyl-CoA delta isomerase 2, mitochondrial                           | 28863  | 260  | 48.46 | 10 | 5.70 | up |
| A0A034WFJ7 | Putative elongator complex protein 1 (Fragment)                      | 118063 | 1025 | 26.63 | 23 | 5.69 | up |
| A0A034VAG4 | Tudor domain-containing protein 12                                   | 96482  | 848  | 10.73 | 8  | 5.69 | up |
| A0A034WUA5 | Coatomer subunit beta                                                | 104950 | 931  | 50.7  | 34 | 5.67 | up |
| A0A034VFZ9 | Kinetochore-associated protein 1 (Fragment)                          | 89215  | 770  | 26.36 | 17 | 5.67 | up |
| A0A034WP91 | NADH dehydrogenase (Ubiquinone) 1 alpha subcomplex subunit 8         | 19823  | 175  | 59.43 | 7  | 5.66 | up |
| M1F4N9     | Glutathione-s-transferase epsilon class 3                            | 25749  | 228  | 48.25 | 11 | 5.64 | up |
| A0A034WE30 | Uncharacterized protein                                              | 43623  | 383  | 19.84 | 7  | 5.63 | up |
| A0A034VLF2 | Coatomer subunit beta                                                | 106993 | 953  | 33.47 | 26 | 5.60 | up |
| A0A034V3E5 | Nuclear pore complex protein Nup107 (Fragment)                       | 103735 | 899  | 34.59 | 25 | 5.55 | up |
| A0A034VAK1 | Heat shock protein 75 kDa, mitochondrial                             | 80438  | 710  | 42.25 | 25 | 5.53 | up |
| A0A034WV61 | Putative glutamine--tRNA ligase                                      | 89401  | 784  | 48.21 | 32 | 5.53 | up |
| A0A034WNF6 | Importin subunit alpha                                               | 57681  | 519  | 29.09 | 12 | 5.51 | up |
| A0A034VER3 | Eukaryotic translation initiation factor 3 subunit C                 | 108335 | 923  | 37.92 | 32 | 5.49 | up |
| A0A034WIL4 | NADH dehydrogenase (Ubiquinone) iron-sulfur protein 2, mitochondrial | 53289  | 473  | 43.97 | 18 | 5.45 | up |
| A0A034W2L3 | Citrate synthase (Fragment)                                          | 28581  | 257  | 63.42 | 15 | 5.37 | up |
| A0A034V786 | AP-3 complex subunit delta                                           | 116643 | 1033 | 8.03  | 8  | 5.36 | up |
| A0A034VD95 | 39S ribosomal protein L1, mitochondrial                              | 41222  | 358  | 19.27 | 6  | 5.34 | up |
| A0A034VQT4 | DNA topoisomerase 1                                                  | 115728 | 1000 | 7.1   | 7  | 5.33 | up |
| A0A034V9P5 | Isoleucine--tRNA ligase, cytoplasmic (Fragment)                      | 83274  | 719  | 49.65 | 29 | 5.33 | up |
| A0A034WR13 | 39S ribosomal protein L23, mitochondrial                             | 17960  | 150  | 30.67 | 5  | 5.32 | up |
| A0A034VKN3 | Leucine--tRNA ligase, cytoplasmic                                    | 135606 | 1182 | 45.18 | 44 | 5.32 | up |
| A0A034VH70 | La-related protein (Fragment)                                        | 132976 | 1206 | 24.71 | 20 | 5.31 | up |

|            |                                                                 |        |      |       |    |      |    |
|------------|-----------------------------------------------------------------|--------|------|-------|----|------|----|
| A0A034WDL1 | NADH-ubiquinone oxidoreductase 75 kDa subunit, mitochondrial    | 80086  | 736  | 46.47 | 29 | 5.25 | up |
| A0A034WUW3 | UPF0160 protein MYG1, mitochondrial (Fragment)                  | 44465  | 385  | 37.14 | 12 | 5.24 | up |
| A0A034VFR8 | Glyoxylate reductase (Fragment)                                 | 30612  | 273  | 45.05 | 8  | 5.21 | up |
| A0A034VH25 | Alpha-tocopherol transfer-like protein                          | 37515  | 324  | 28.4  | 10 | 5.20 | up |
| A0A034V3F2 | 26S protease regulatory subunit 7                               | 48544  | 433  | 62.82 | 30 | 5.19 | up |
| A0A034VA48 | Prolyl 4-hydroxylase subunit alpha-2                            | 64303  | 561  | 23.53 | 9  | 5.19 | up |
| A0A034W1C0 | Eukaryotic translation initiation factor 4 gamma 2              | 106157 | 942  | 27.81 | 19 | 5.18 | up |
| A0A034VKX9 | Alkyldihydroxyacetonephosphate synthase (Fragment)              | 76813  | 689  | 22.35 | 11 | 5.12 | up |
| A0A034W6X9 | GTP-binding protein 128up                                       | 41005  | 368  | 52.45 | 16 | 5.12 | up |
| A0A034VKY3 | RuvB-like helicase 2                                            | 53267  | 476  | 36.34 | 14 | 5.07 | up |
| A0A034VM32 | CCR4-NOT transcription complex subunit 1 (Fragment)             | 123312 | 1091 | 20.99 | 20 | 5.06 | up |
| A0A034VFI5 | Centromere/kinetochore protein zw10                             | 81461  | 708  | 17.94 | 11 | 5.03 | up |
| A0A034W6I8 | Exportin-2                                                      | 109799 | 972  | 34.88 | 33 | 5.02 | up |
| A0A034VRR7 | E3 ubiquitin-protein ligase listerin                            | 193519 | 1664 | 9.74  | 14 | 5.00 | up |
| A0A034V2H4 | Methionine--tRNA ligase, cytoplasmic                            | 107507 | 969  | 41.49 | 29 | 4.97 | up |
| A0A034VCV5 | Nuclear cap-binding protein subunit 1                           | 93543  | 801  | 26.34 | 16 | 4.96 | up |
| A0A034WCI4 | ATP synthase subunit alpha                                      | 59516  | 552  | 57.43 | 34 | 4.95 | up |
| A0A034VFL7 | Nucleolar protein 6                                             | 148323 | 1294 | 9.43  | 10 | 4.95 | up |
| A0A034WU84 | Proteasome subunit alpha type                                   | 28026  | 253  | 60.08 | 14 | 4.93 | up |
| A0A034WIR4 | DnaJ-like protein subfamily C member 2                          | 72239  | 618  | 28.48 | 14 | 4.90 | up |
| A0A034VJS5 | Heat shock 70 kDa protein 14                                    | 57360  | 513  | 31.38 | 13 | 4.90 | up |
| A0A034V3F4 | Tripeptidyl-peptidase 2                                         | 149295 | 1353 | 47.97 | 54 | 4.90 | up |
| A0A034VDF5 | Developmentally-regulated GTP-binding protein 2                 | 40576  | 363  | 50.14 | 14 | 4.89 | up |
| A0A034V402 | COP9 signalosome complex subunit 8                              | 21657  | 184  | 21.2  | 3  | 4.88 | up |
| A0A034WNZ1 | Ubiquitin-conjugating enzyme E2 N                               | 17208  | 151  | 52.32 | 8  | 4.88 | up |
| A0A034W3L0 | Ankyrin repeat and KH domain-containing protein mask (Fragment) | 54726  | 507  | 29.98 | 11 | 4.84 | up |
| A0A034WLF6 | FK506-binding protein 59                                        | 48986  | 437  | 59.27 | 29 | 4.84 | up |
| A0A034UZB5 | Protein purity of essence (Fragment)                            | 237724 | 2178 | 13.77 | 25 | 4.84 | up |

|             |                                                                              |        |      |       |    |      |    |
|-------------|------------------------------------------------------------------------------|--------|------|-------|----|------|----|
| A0A034W9B6  | T-complex protein 1 subunit zeta                                             | 58468  | 531  | 64.22 | 28 | 4.79 | up |
| A0A034W590  | Ubiquitin-like modifier-activating enzyme 1                                  | 133041 | 1204 | 58.89 | 53 | 4.79 | up |
| A0A034VJH4  | N-alpha-acetyltransferase 16, NatA auxiliary subunit                         | 101634 | 878  | 33.94 | 28 | 4.76 | up |
| D9YID1      | Ribosomal protein S6 kinase                                                  | 57202  | 507  | 11.05 | 5  | 4.76 | up |
| A0A034V2H3  | Protein purity of essence (Fragment)                                         | 104460 | 945  | 15.24 | 10 | 4.73 | up |
| A0A034W6E5  | Lysine--tRNA ligase                                                          | 66232  | 584  | 42.12 | 23 | 4.72 | up |
| A0A034WFC0  | ATP synthase subunit gamma                                                   | 33092  | 297  | 38.72 | 12 | 4.64 | up |
| A0A034WRG8  | Putative ribosomal RNA methyltransferase NOP2                                | 93568  | 812  | 16.87 | 11 | 4.64 | up |
| A0A034VAW1  | Signal recognition particle subunit SRP68                                    | 69067  | 601  | 32.45 | 20 | 4.62 | up |
| A0A034V6Q5  | mRNA turnover protein 4-like protein                                         | 29891  | 257  | 28.79 | 8  | 4.61 | up |
| A0A034W8Z3  | Putative ATP-dependent RNA helicase DDX43                                    | 74677  | 662  | 47.28 | 27 | 4.60 | up |
| A0A034VH61  | Putative aminopeptidase W07G4.4                                              | 54904  | 505  | 59.8  | 27 | 4.58 | up |
| A0A034W9F2  | Histone-lysine N-methyltransferase setd3                                     | 61477  | 534  | 36.14 | 17 | 4.57 | up |
| A0A034VYR3  | Nucleolar protein 58                                                         | 81673  | 728  | 43.82 | 30 | 4.56 | up |
| A0A034V675  | Unconventional myosin-Va (Fragment)                                          | 161865 | 1379 | 6.74  | 7  | 4.54 | up |
| A0A034VP19  | WD repeat-containing protein 36                                              | 104546 | 932  | 9.44  | 7  | 4.53 | up |
| A0A034V1T1  | Protein purity of essence (Fragment)                                         | 110879 | 976  | 15.16 | 12 | 4.50 | up |
| A0A034VEG2  | ER membrane protein complex subunit 1 (Fragment)                             | 68095  | 611  | 24.39 | 11 | 4.49 | up |
| A0A034WI55  | Eukaryotic translation initiation factor 3 subunit D                         | 63076  | 554  | 43.68 | 18 | 4.48 | up |
| A0A034WNJ6  | Heat shock 70 kDa protein cognate 5                                          | 73628  | 679  | 55.23 | 34 | 4.47 | up |
| A0A034WL74  | Midasin (Fragment)                                                           | 124703 | 1102 | 8.89  | 9  | 4.44 | up |
| A0A034VKY9  | DnaJ-like protein subfamily C member 7                                       | 54472  | 474  | 24.05 | 10 | 4.40 | up |
| A0A034W901  | NADH dehydrogenase (Ubiquinone) 1 alpha subcomplex subunit 10, mitochondrial | 46869  | 405  | 54.81 | 20 | 4.37 | up |
| A0A034VRL9  | H/ACA ribonucleoprotein complex subunit 4 (Fragment)                         | 61846  | 547  | 25.59 | 13 | 4.36 | up |
| A0A034WPS5  | COP9 signalosome complex subunit 1b                                          | 56677  | 511  | 25.24 | 10 | 4.35 | up |
| A0A034VIFY5 | Ras-related protein Rab-6A                                                   | 23481  | 208  | 51.44 | 8  | 4.35 | up |

|            |                                                                    |        |      |       |    |      |    |
|------------|--------------------------------------------------------------------|--------|------|-------|----|------|----|
| A0A034WPC8 | Cysteine--tRNA ligase, cytoplasmic                                 | 84539  | 740  | 38.38 | 25 | 4.34 | up |
| A0A034VEH7 | Prefoldin subunit 4                                                | 15819  | 137  | 34.31 | 4  | 4.32 | up |
| A0A034VMA3 | L-threonine 3-dehydrogenase,<br>mitochondrial                      | 41242  | 365  | 17.53 | 5  | 4.31 | up |
| A0A034WVA3 | Elongation factor Tu                                               | 53920  | 490  | 49.39 | 19 | 4.26 | up |
| A0A034W692 | Putative ATP-dependent RNA helicase<br>DDX20 (Fragment)            | 42397  | 381  | 50.92 | 16 | 4.26 | up |
| A0A034W1G8 | Transcription elongation regulator 1<br>(Fragment)                 | 92302  | 765  | 10.85 | 8  | 4.25 | up |
| A0A034VBM4 | Trifunctional purine biosynthetic protein<br>adenosine-3           | 148058 | 1368 | 35.75 | 39 | 4.25 | up |
| A0A034VN48 | Putative fatty acyl-CoA reductase<br>CG5065                        | 64021  | 566  | 12.19 | 7  | 4.23 | up |
| A0A034WRK8 | Farnesyl pyrophosphate synthase                                    | 46845  | 408  | 17.16 | 6  | 4.21 | up |
| A0A034VA86 | 116 kDa U5 small nuclear<br>ribonucleoprotein component            | 110665 | 975  | 26.46 | 22 | 4.18 | up |
| A0A034V6V7 | Coatomer subunit alpha                                             | 139329 | 1233 | 38.04 | 36 | 4.18 | up |
| A0A034WJ65 | Vigilin                                                            | 142149 | 1278 | 43.27 | 45 | 4.18 | up |
| A0A034W550 | Phospholipase A-2-activating protein                               | 85785  | 787  | 43.58 | 24 | 4.17 | up |
| A0A034V9G7 | Eukaryotic translation initiation factor 5B                        | 134978 | 1215 | 24.86 | 20 | 4.16 | up |
| A0A034V3U3 | Mitochondrial import receptor subunit<br>TOM22-like protein        | 16705  | 150  | 51.33 | 7  | 4.15 | up |
| A0A034VGJ0 | Putative multidrug resistance-associated<br>protein lethal(2)03659 | 57681  | 513  | 21.64 | 9  | 4.15 | up |
| A0A034WIJ6 | Transducin beta-like protein 3<br>(Fragment)                       | 83189  | 750  | 10.4  | 6  | 4.12 | up |
| A0A034V083 | Uncharacterized protein                                            | 33332  | 295  | 43.73 | 8  | 4.11 | up |
| A0A034V540 | Uncharacterized protein                                            | 28794  | 253  | 43.08 | 9  | 4.10 | up |
| A0A034WSI9 | Glutathione S-transferase 1                                        | 25141  | 221  | 33.03 | 9  | 4.07 | up |
| A0A034VX54 | Aspartate aminotransferase, cytoplasmic                            | 45679  | 407  | 60.69 | 20 | 4.06 | up |
| A0A034VV21 | Nuclear pore complex protein Nup205<br>(Fragment)                  | 124867 | 1088 | 22.79 | 20 | 4.06 | up |
| A0A034V2I5 | Putative ATP-dependent RNA helicase<br>DDX17 (Fragment)            | 57084  | 523  | 40.34 | 18 | 4.06 | up |
| A0A034WRS4 | 60S acidic ribosomal protein P2                                    | 11743  | 113  | 74.34 | 9  | 4.04 | up |

|            |                                                                             |        |      |       |    |      |    |
|------------|-----------------------------------------------------------------------------|--------|------|-------|----|------|----|
| A0A034WIU7 | Tetratricopeptide repeat protein 27                                         | 91135  | 792  | 16.67 | 11 | 3.99 | up |
| A0A034WVQ7 | Nodal modulator 1                                                           | 135226 | 1207 | 22.37 | 20 | 3.98 | up |
| A0A034WHJ1 | Histidine--tRNA ligase, cytoplasmic                                         | 56910  | 512  | 50.59 | 22 | 3.97 | up |
| A0A034VNJ3 | Proline dehydrogenase 1, mitochondrial                                      | 80238  | 704  | 23.72 | 13 | 3.97 | up |
| A0A034V6T2 | Insulin-degrading enzyme                                                    | 120515 | 1048 | 24.43 | 24 | 3.94 | up |
| A0A034VZH7 | 26S proteasome non-ATPase regulatory subunit 2                              | 101079 | 911  | 48.74 | 35 | 3.93 | up |
| A0A034WSY7 | Nucleolar GTP-binding protein 1                                             | 75319  | 651  | 23.04 | 13 | 3.91 | up |
| A0A034WDU4 | Endoplasmin                                                                 | 91351  | 797  | 56.21 | 46 | 3.90 | up |
| A0A034WNJ2 | Signal recognition particle subunit SRP72                                   | 73751  | 654  | 43.58 | 24 | 3.90 | up |
| A0A034WMW7 | Putative elongator complex protein 4                                        | 51886  | 463  | 29.81 | 9  | 3.89 | up |
| A0A034WU78 | Fumarate hydratase, mitochondrial                                           | 54067  | 500  | 48    | 18 | 3.87 | up |
| A0A034WGZ6 | 40S ribosomal protein S7 (Fragment)                                         | 16318  | 141  | 49.65 | 10 | 3.84 | up |
| A0A034VAS4 | Acetyltransferase component of pyruvate dehydrogenase complex               | 53683  | 503  | 39.36 | 14 | 3.79 | up |
| A0A034WK84 | Proteasome subunit beta type                                                | 29551  | 265  | 44.53 | 12 | 3.79 | up |
| A0A034V4B4 | Maternal protein tudor                                                      | 303712 | 2704 | 25.89 | 58 | 3.77 | up |
| A0A034WAN7 | Signal recognition particle 54 kDa protein                                  | 55927  | 508  | 36.22 | 12 | 3.76 | up |
| A0A034W710 | Ankyrin repeat and KH domain-containing protein mask (Fragment)             | 85099  | 788  | 10.79 | 5  | 3.71 | up |
| A0A034WRK0 | Mitochondrial import receptor subunit TOM70                                 | 66886  | 591  | 40.61 | 21 | 3.70 | up |
| A0A034W1H3 | Nuclear pore complex protein Nup93                                          | 92985  | 809  | 38.32 | 27 | 3.68 | up |
| A0A034W0P2 | Tudor domain-containing protein 1                                           | 75457  | 653  | 16.69 | 10 | 3.68 | up |
| A0A034V250 | Glycogen debranching enzyme                                                 | 210785 | 1878 | 18.69 | 32 | 3.67 | up |
| A0A034V087 | Guanine nucleotide-binding-like protein 3-like protein (Fragment)           | 69470  | 610  | 29.02 | 16 | 3.67 | up |
| A0A034V4D6 | DnaJ-like protein subfamily C member 13 (Fragment)                          | 220756 | 1936 | 21.02 | 31 | 3.66 | up |
| A0A034VW24 | NADH dehydrogenase (Ubiquinone) 1 alpha subcomplex subunit 9, mitochondrial | 47184  | 412  | 39.08 | 16 | 3.65 | up |
| A0A034VEP3 | 4-aminobutyrate aminotransferase, mitochondrial                             | 54817  | 491  | 48.88 | 18 | 3.64 | up |
| A0A034VF36 | Ubiquitin-conjugating enzyme E2 Q2                                          | 43953  | 389  | 9.77  | 3  | 3.63 | up |

|            |                                                                        |        |      |       |    |      |    |
|------------|------------------------------------------------------------------------|--------|------|-------|----|------|----|
| A0A034VST3 | Nicalin-1                                                              | 62816  | 561  | 23.71 | 10 | 3.61 | up |
| A0A034V7N4 | Myosin heavy chain 95F                                                 | 141826 | 1240 | 28.63 | 32 | 3.60 | up |
| A0A034WCY3 | Dedicator of cytokinesis protein 3<br>(Fragment)                       | 204946 | 1790 | 5.81  | 9  | 3.56 | up |
| A0A034VIU6 | ATP synthase-coupling factor 6,<br>mitochondrial                       | 11877  | 105  | 39.05 | 6  | 3.50 | up |
| A0A034VFE4 | DDB1-and CUL4-associated factor-like 1<br>(Fragment)                   | 106321 | 962  | 12.89 | 9  | 3.50 | up |
| A0A034VY24 | ATP-dependent RNA helicase Ddx1<br>(Fragment)                          | 84144  | 750  | 41.33 | 27 | 3.48 | up |
| A0A034WGV9 | Tryptophan--tRNA ligase, cytoplasmic                                   | 48047  | 428  | 29.44 | 11 | 3.46 | up |
| A0A034VCY4 | Tudor domain-containing protein 7<br>(Fragment)                        | 108951 | 956  | 25.63 | 18 | 3.41 | up |
| A0A034WNV2 | 39S ribosomal protein L3, mitochondrial                                | 42074  | 370  | 24.32 | 8  | 3.40 | up |
| A0A034WPQ1 | DnaJ-like protein subfamily A member 1                                 | 45576  | 402  | 55.72 | 22 | 3.40 | up |
| A0A034VNQ2 | Nuclear pore complex protein Nup85                                     | 77843  | 677  | 36.63 | 19 | 3.38 | up |
| A0A034WJS4 | Protein l(2)37Cc                                                       | 30367  | 276  | 85.14 | 21 | 3.38 | up |
| A0A034WBB3 | Serine-threonine kinase receptor-<br>associated protein                | 32672  | 295  | 48.14 | 10 | 3.38 | up |
| A0A034WTU5 | 39S ribosomal protein L12, mitochondrial                               | 19776  | 183  | 24.04 | 2  | 3.37 | up |
| A0A034VDF3 | Squamous cell carcinoma antigen<br>recognized by T-cells 3 (Fragment)  | 61804  | 532  | 31.2  | 17 | 3.34 | up |
| A0A034VXN0 | Short/branched chain specific acyl-CoA<br>dehydrogenase, mitochondrial | 45479  | 413  | 41.16 | 12 | 3.30 | up |
| A0A034W308 | Bifunctional 3'-phosphoadenosine 5'-<br>phosphosulfate synthase        | 70060  | 625  | 38.56 | 17 | 3.29 | up |
| A0A034WWN2 | DEAD-box helicase Dbp80                                                | 51990  | 463  | 59.83 | 22 | 3.29 | up |
| A0A034V555 | Ubiquitin carboxyl-terminal hydrolase<br>(Fragment)                    | 138806 | 1221 | 14.58 | 15 | 3.28 | up |
| A0A034W1I4 | Exportin-5 (Fragment)                                                  | 95335  | 841  | 14.63 | 11 | 3.26 | up |
| A0A034W705 | Ras-related protein Rab-2A                                             | 23664  | 213  | 66.2  | 12 | 3.26 | up |
| A0A034WMK4 | Zinc finger protein ZPR1                                               | 51616  | 457  | 23.85 | 10 | 3.25 | up |
| A0A034W5W7 | Kelch domain-containing protein 4                                      | 57367  | 514  | 15.76 | 7  | 3.24 | up |
| A0A034VQ24 | 60S ribosomal export protein NMD3                                      | 59124  | 517  | 30.95 | 12 | 3.23 | up |

|             |                                                                          |        |      |       |    |      |    |
|-------------|--------------------------------------------------------------------------|--------|------|-------|----|------|----|
| A0A034VFS4  | Glutamate-rich WD repeat-containing protein 1                            | 52062  | 465  | 18.49 | 7  | 3.23 | up |
| A0A034VG90  | Nuclear pore complex protein Nup133                                      | 135450 | 1193 | 20.12 | 19 | 3.23 | up |
| A0A034WCL6  | Peptidyl-prolyl cis-trans isomerase FKBP6 (Fragment)                     | 54511  | 478  | 43.93 | 16 | 3.22 | up |
| A0A034VMD8  | Cytoskeleton-associated protein 5 (Fragment)                             | 135423 | 1227 | 26.57 | 26 | 3.15 | up |
| A0A034WQD6  | Armadillo repeat-containing protein 8                                    | 74696  | 664  | 15.21 | 9  | 3.14 | up |
| A0A034W6W9  | Translocation protein SEC63-like protein                                 | 86851  | 759  | 15.68 | 10 | 3.11 | up |
| A0A034WIS7  | NADH dehydrogenase (Ubiquinone) flavoprotein 1, mitochondrial (Fragment) | 52627  | 480  | 44.37 | 17 | 3.10 | up |
| A0A034WSC9  | Putative apoptosis-inducing factor 1, mitochondrial                      | 74598  | 685  | 29.78 | 13 | 3.09 | up |
| A0A034W273  | Aspartate--tRNA ligase, cytoplasmic                                      | 60020  | 539  | 49.91 | 25 | 3.07 | up |
| A0A034WMX6  | Putative prefoldin subunit 5                                             | 18487  | 160  | 76.88 | 10 | 3.07 | up |
| A0A034WCH5  | Obg-like ATPase 1                                                        | 44839  | 397  | 53.9  | 16 | 3.06 | up |
| A0A034WJH2  | Protein dpy-30-like protein                                              | 10966  | 99   | 47.47 | 4  | 3.05 | up |
| A0A034VFT5  | tRNA (Cytosine(34)-C(5))-methyltransferase                               | 82282  | 728  | 33.52 | 16 | 3.05 | up |
| A0A034VFFV1 | Cytosolic 10-formyltetrahydrofolate dehydrogenase (Fragment)             | 75060  | 687  | 47.02 | 23 | 3.04 | up |
| A0A034WBD3  | Protein TBRC4                                                            | 63632  | 581  | 18.76 | 8  | 3.02 | up |
| A0A034VRI8  | E3 ubiquitin-protein ligase hyd (Fragment)                               | 266419 | 2371 | 11.43 | 24 | 2.95 | up |
| A0A034W9S5  | Glycylpeptide N-tetradecanoyltransferase                                 | 54261  | 475  | 41.89 | 18 | 2.95 | up |
| A0A034VJX4  | Very long-chain-fatty-acid--CoA ligase bubblegum                         | 74013  | 666  | 30.33 | 15 | 2.95 | up |
| A0A034VS83  | Hypoxia up-regulated protein 1                                           | 107546 | 957  | 42.11 | 30 | 2.93 | up |
| A0A034W954  | Protein RRP5-like protein                                                | 163045 | 1433 | 17.52 | 19 | 2.93 | up |
| A0A034WCD3  | NEDD8-activating enzyme E1 regulatory subunit                            | 58530  | 522  | 29.12 | 13 | 2.92 | up |
| A0A034WAX6  | Oligopeptidase A                                                         | 81683  | 724  | 43.09 | 26 | 2.84 | up |
| A0A034WPD8  | Putative rRNA methyltransferase                                          | 93409  | 814  | 10.44 | 8  | 2.83 | up |
| A0A034VW78  | Protein misato                                                           | 64326  | 564  | 12.41 | 5  | 2.81 | up |

|            |                                                                            |        |      |       |    |      |    |
|------------|----------------------------------------------------------------------------|--------|------|-------|----|------|----|
| A0A034WG96 | Putative elongator complex protein 2                                       | 93814  | 830  | 17.35 | 11 | 2.79 | up |
| A0A034WBU6 | Putative 39S ribosomal protein L24, mitochondrial                          | 29141  | 248  | 37.1  | 7  | 2.75 | up |
| A0A034W4A7 | Glutathione S-transferase 1-1                                              | 23716  | 207  | 49.76 | 11 | 2.74 | up |
| A0A034VMX3 | NADH dehydrogenase (Ubiquinone) flavoprotein 2, mitochondrial              | 26900  | 243  | 53.09 | 10 | 2.74 | up |
| A0A034VZ68 | Protein arginine N-methyltransferase                                       | 72002  | 624  | 20.35 | 10 | 2.71 | up |
| A0A034VF44 | WD repeat-containing protein mio (Fragment)                                | 69582  | 613  | 15.33 | 8  | 2.70 | up |
| A0A034W4T9 | Ubiquitin carboxyl-terminal hydrolase                                      | 110903 | 1010 | 16.53 | 11 | 2.67 | up |
| A0A034VCR1 | Putative glycogen (Starch) synthase                                        | 80869  | 702  | 25.21 | 14 | 2.64 | up |
| A0A034VVK7 | Chaperone activity of bc1 complex-like, mitochondrial                      | 78284  | 701  | 24.39 | 13 | 2.62 | up |
| A0A034WPC0 | D-arabinose 1-dehydrogenase                                                | 39068  | 346  | 36.99 | 12 | 2.61 | up |
| A0A034WKD6 | Activator of 90 kDa heat shock protein ATPase-like protein 1               | 40213  | 353  | 44.19 | 15 | 2.58 | up |
| A0A034W8R2 | Ribosomal RNA processing protein 1-like protein                            | 81414  | 704  | 13.49 | 8  | 2.58 | up |
| A0A034VTV6 | Glutaredoxin-related protein 5, mitochondrial                              | 18955  | 169  | 29.59 | 4  | 2.56 | up |
| A0A034WKL8 | Putative rRNA-processing protein EBP2-like protein                         | 35357  | 307  | 15.96 | 4  | 2.54 | up |
| A0A034V8U5 | Putative RNA helicase armi                                                 | 139061 | 1208 | 13.91 | 15 | 2.53 | up |
| A0A034WSS0 | Protein unc-45-like protein B                                              | 105514 | 943  | 14.1  | 11 | 2.50 | up |
| A0A034WE70 | Eukaryotic translation initiation factor 3 subunit F                       | 31217  | 280  | 65.36 | 13 | 2.49 | up |
| A0A034WMK1 | DNA-directed RNA polymerase                                                | 186312 | 1649 | 16.43 | 20 | 2.42 | up |
| A0A034V222 | 39S ribosomal protein L16, mitochondrial                                   | 21943  | 189  | 32.8  | 5  | 2.40 | up |
| A0A034VSP0 | Phagocyte signaling-impaired protein                                       | 114527 | 989  | 12.44 | 12 | 2.30 | up |
| A0A034V7P1 | DNA polymerase                                                             | 125024 | 1098 | 19.95 | 19 | 2.27 | up |
| A0A034WSK7 | Signal recognition particle receptor subunit alpha-like protein (Fragment) | 66631  | 597  | 34.34 | 18 | 2.24 | up |
| A0A034W887 | Prolactin regulatory element-binding protein                               | 49585  | 448  | 23.44 | 8  | 2.13 | up |
| A0A034W439 | Ubiquitin carboxyl-terminal hydrolase                                      | 90946  | 809  | 43.39 | 26 | 2.07 | up |



|            |                                                                                    |        |      |       |    |      |      |
|------------|------------------------------------------------------------------------------------|--------|------|-------|----|------|------|
| A0A034WYF0 | Peroxiredoxin-2                                                                    | 26204  | 233  | 51.93 | 11 | 2.03 | up   |
| A0A034V9S0 | Large subunit GTPase 1-like protein                                                | 73159  | 641  | 23.87 | 12 | 1.92 | up   |
| A0A034WAD0 | Uncharacterized protein                                                            | 14800  | 150  | 80    | 8  | 0.58 | down |
| A0A034VRI7 | Alpha-actinin, sarcomeric                                                          | 103820 | 895  | 62.35 | 53 | 0.55 | down |
| A0A034WIC2 | Putative alpha-aspartyl dipeptidase                                                | 27043  | 240  | 33.33 | 7  | 0.55 | down |
| A0A034VPM4 | Vinculin                                                                           | 106095 | 960  | 50.63 | 38 | 0.54 | down |
| A0A034VKE6 | Bifunctional methylenetetrahydrofolate dehydrogenase/cyclohydrolase, mitochondrial | 34038  | 316  | 32.59 | 8  | 0.50 | down |
| A0A034VXI2 | Aldehyde dehydrogenase family 3 member B1                                          | 62405  | 559  | 35.24 | 17 | 0.49 | down |
| A0A034VUR2 | Protein disulfide-isomerase A5                                                     | 195906 | 1693 | 4.13  | 6  | 0.49 | down |
| A0A034WHJ3 | Uncharacterized protein                                                            | 276170 | 2345 | 24.18 | 52 | 0.49 | down |
| A0A034WDJ1 | CD109 antigen                                                                      | 165284 | 1472 | 15.35 | 21 | 0.48 | down |
| A0A034WAL2 | Histone H1, gonadal                                                                | 23448  | 215  | 31.16 | 6  | 0.47 | down |
| A0A034W374 | Metal transporter CNM2                                                             | 105061 | 947  | 19.54 | 14 | 0.47 | down |
| A0A034VQG5 | Nucleoprotein TPR                                                                  | 271019 | 2410 | 26.22 | 53 | 0.47 | down |
| A0A034VK06 | Dystonin (Fragment)                                                                | 566833 | 4968 | 12.32 | 52 | 0.46 | down |
| A0A034VFW9 | Uncharacterized protein (Fragment)                                                 | 50113  | 443  | 24.83 | 7  | 0.46 | down |
| A0A034WQZ8 | Zinc carboxypeptidase A 1                                                          | 53165  | 464  | 49.35 | 16 | 0.46 | down |
| A0A034VYI5 | Non-specific protein-tyrosine kinase                                               | 58701  | 510  | 27.25 | 12 | 0.45 | down |
| A0A034VW38 | SUN domain-containing protein 1 (Fragment)                                         | 67523  | 594  | 21.55 | 13 | 0.45 | down |
| A0A034V5V1 | ZNF domain containing Pogo transposable element                                    | 147005 | 1326 | 16.14 | 18 | 0.43 | down |
| A0A034WSJ2 | Membrane-associated progesterone receptor component 2                              | 25529  | 231  | 40.26 | 8  | 0.42 | down |
| A0A034WSP8 | Tumor protein D54                                                                  | 39216  | 351  | 43.3  | 13 | 0.42 | down |
| A0A034VNQ6 | UBX domain-containing protein 1                                                    | 35187  | 316  | 31.65 | 9  | 0.42 | down |
| A0A034WBM1 | Acetyl-CoA acetyltransferase, cytosolic                                            | 41553  | 394  | 41.62 | 11 | 0.41 | down |
| A0A034VU54 | Neuroserpin (Fragment)                                                             | 50223  | 451  | 37.47 | 14 | 0.41 | down |
| A0A034WG74 | Beta-galactosidase                                                                 | 72023  | 639  | 28.48 | 13 | 0.40 | down |
| A0A034UZL6 | Vacuolar protein sorting-associated protein 13A (Fragment)                         | 293380 | 2604 | 23.85 | 49 | 0.40 | down |
| A0A034WM87 | Glutamine synthetase                                                               | 44947  | 402  | 29.35 | 8  | 0.39 | down |

|            |                                                                   |        |      |       |     |      |      |
|------------|-------------------------------------------------------------------|--------|------|-------|-----|------|------|
| A0A034V413 | Nesprin-1                                                         | 915393 | 7973 | 19.68 | 119 | 0.39 | down |
| A0A034VI64 | Carboxypeptidase                                                  | 55213  | 483  | 44.72 | 25  | 0.38 | down |
| A0A034WAI7 | Non-specific serine/threonine protein kinase                      | 64369  | 571  | 16.81 | 7   | 0.38 | down |
| A0A034WQQ0 | Calcyphosin-like protein                                          | 24650  | 219  | 27.4  | 6   | 0.37 | down |
| A0A034VE56 | Galectin                                                          | 60787  | 532  | 12.78 | 7   | 0.37 | down |
| A0A034WSZ7 | Heterochromatin protein 1                                         | 23688  | 212  | 23.11 | 5   | 0.37 | down |
| A0A034W5F4 | Uncharacterized protein                                           | 28374  | 246  | 26.02 | 7   | 0.37 | down |
| A0A034V6L8 | Filamin-B                                                         | 87995  | 815  | 5.15  | 4   | 0.36 | down |
| A0A034V3R0 | Papilin                                                           | 333708 | 3093 | 19.92 | 49  | 0.36 | down |
| A0A034VM61 | Clavesin-2                                                        | 36462  | 320  | 33.44 | 9   | 0.35 | down |
| A0A034VUS9 | Dihydropyrimidine dehydrogenase (NADP(+))                         | 113562 | 1047 | 5.83  | 5   | 0.35 | down |
| A0A034VDX0 | L-2-hydroxyglutarate dehydrogenase, mitochondrial                 | 50614  | 455  | 31.21 | 10  | 0.35 | down |
| A0A034VPR7 | Putative peptidyl-prolyl cis-trans isomerase dodo                 | 17917  | 160  | 57.5  | 11  | 0.35 | down |
| A0A034VS34 | Uncharacterized protein                                           | 90376  | 818  | 4.28  | 3   | 0.35 | down |
| A0A034WLM6 | Chromosomal protein D1                                            | 23347  | 211  | 30.33 | 4   | 0.34 | down |
| M1F3Z9     | Glutathione S-transferase omega-1                                 | 29161  | 255  | 46.67 | 11  | 0.34 | down |
| A0A034WN98 | 17-beta-hydroxysteroid dehydrogenase 13                           | 36367  | 326  | 25.15 | 7   | 0.33 | down |
| A0A034V7D4 | Microsomal triglyceride transfer protein large subunit (Fragment) | 82310  | 737  | 34.6  | 24  | 0.33 | down |
| A0A034V7N7 | Protein lethal(2) giant larvae                                    | 127930 | 1176 | 24.23 | 21  | 0.33 | down |
| A0A034VZK0 | Muscle M-line assembly protein unc-89                             | 372226 | 3274 | 12.43 | 33  | 0.32 | down |
| A0A034WJT9 | Chitooligosaccharidolytic beta-N-acetylglucosaminidase (Fragment) | 51218  | 451  | 16.63 | 6   | 0.31 | down |
| A0A034VG51 | Uncharacterized protein (Fragment)                                | 67454  | 610  | 9.67  | 6   | 0.31 | down |
| A0A034V8X4 | Alcohol dehydrogenase (NADP(+)) A                                 | 39659  | 350  | 40    | 11  | 0.30 | down |
| A0A034W4V5 | DE-cadherin                                                       | 178717 | 1580 | 14.75 | 22  | 0.30 | down |
| A0A034VTK4 | DNA topoisomerase 2                                               | 167839 | 1481 | 42.13 | 59  | 0.30 | down |
| A0A034WS42 | Histone H4                                                        | 11382  | 103  | 65.05 | 15  | 0.30 | down |
| A0A034W2B1 | Protein peanut                                                    | 59357  | 526  | 21.86 | 11  | 0.30 | down |
| A0A034WF58 | Glutathione peroxidase                                            | 30583  | 278  | 48.92 | 13  | 0.29 | down |

|            |                                                                 |        |      |       |    |      |      |
|------------|-----------------------------------------------------------------|--------|------|-------|----|------|------|
| A0A034WML8 | Protein takeout                                                 | 30874  | 269  | 20.07 | 4  | 0.29 | down |
| A0A034WT25 | Uncharacterized protein                                         | 31077  | 274  | 43.8  | 8  | 0.29 | down |
| A0A034V3G3 | Uncharacterized protein (Fragment)                              | 45689  | 397  | 24.18 | 7  | 0.29 | down |
| A0A034VRQ6 | Protein held out wings                                          | 39076  | 356  | 37.64 | 11 | 0.28 | down |
| A0A034W4Y6 | Pyruvate carboxylase                                            | 130974 | 1181 | 47.59 | 45 | 0.28 | down |
| A0A034VKY5 | Uncharacterized protein                                         | 112036 | 1045 | 9.09  | 7  | 0.28 | down |
| A0A034V2B1 | Uncharacterized protein (Fragment)                              | 199309 | 1825 | 7.18  | 10 | 0.28 | down |
| A0A034VLS7 | V-type proton ATPase subunit a                                  | 94994  | 834  | 18.11 | 15 | 0.28 | down |
| A0A034VI38 | Lysosomal acid phosphatase                                      | 55250  | 477  | 33.75 | 12 | 0.27 | down |
| A0A034WB29 | Cytoplasmic protein NCK1                                        | 62548  | 564  | 12.06 | 6  | 0.26 | down |
| A0A034V4T6 | Fasciclin-2 (Fragment)                                          | 57857  | 520  | 45.19 | 17 | 0.26 | down |
| A0A034VAC6 | Protein elav                                                    | 47180  | 446  | 35.65 | 12 | 0.26 | down |
| A0A034VVJ5 | V-type proton ATPase subunit E                                  | 26077  | 226  | 63.27 | 13 | 0.26 | down |
| A0A034VUP0 | Chitinase-like protein Idgf1 (Fragment)                         | 53054  | 471  | 15.92 | 6  | 0.25 | down |
| A0A034V1H8 | Filamin-A (Fragment)                                            | 141569 | 1301 | 54.04 | 58 | 0.25 | down |
| A0A034VWH3 | Myosin regulatory light chain 2                                 | 23610  | 222  | 52.7  | 10 | 0.25 | down |
| A0A034W3K4 | Myosin-IB                                                       | 117898 | 1025 | 10.15 | 10 | 0.25 | down |
| A0A034W317 | Uncharacterized protein                                         | 84817  | 798  | 20.93 | 14 | 0.25 | down |
| A0A034WRZ0 | Leucine-rich repeat transmembrane neuronal protein 2 (Fragment) | 52267  | 472  | 15.25 | 6  | 0.24 | down |
| A0A034W6C4 | Ubiquitin-conjugating enzyme E2 H                               | 20867  | 183  | 39.34 | 7  | 0.24 | down |
| A0A034V975 | Uncharacterized protein                                         | 75107  | 674  | 30.42 | 18 | 0.24 | down |
| A0A034WT83 | Alpha-tocopherol transfer-like protein                          | 33631  | 287  | 19.86 | 4  | 0.23 | down |
| A0A034WWI9 | Ejaculatory bulb-specific protein 3                             | 14702  | 127  | 22.05 | 3  | 0.23 | down |
| A0A034VPA5 | Heterogeneous nuclear ribonucleoprotein Q (Fragment)            | 47111  | 417  | 21.34 | 9  | 0.23 | down |
| A0A034WL14 | RING finger protein unkempt (Fragment)                          | 69020  | 604  | 12.91 | 5  | 0.23 | down |
| A0A034UX56 | Trehalose 6-phosphate phosphatase                               | 31189  | 274  | 81.75 | 25 | 0.23 | down |
| A0A034VE41 | Twitchin (Fragment)                                             | 556499 | 4978 | 23.54 | 86 | 0.23 | down |
| A0A034WR33 | Copper homeostasis protein cutC-like protein                    | 27453  | 256  | 18.75 | 4  | 0.22 | down |
| A0A034V1F4 | Low-density lipoprotein receptor-related protein 2 (Fragment)   | 187971 | 1677 | 7.39  | 9  | 0.22 | down |
| A0A034VDP0 | Obscurin (Fragment)                                             | 70619  | 631  | 30.74 | 13 | 0.22 | down |
| A0A034W8V0 | Otefin                                                          | 44986  | 402  | 29.6  | 9  | 0.22 | down |

|             |                                                                                               |        |      |       |    |      |      |
|-------------|-----------------------------------------------------------------------------------------------|--------|------|-------|----|------|------|
| A0A034UZS9  | PDZ and LIM domain protein Zasp                                                               | 52978  | 495  | 22.22 | 9  | 0.22 | down |
| A0A034VZ39  | Peroxidasin                                                                                   | 136185 | 1202 | 18.89 | 19 | 0.22 | down |
| A0A034V2K7  | Spectrin beta chain, non-erythrocytic 5                                                       | 483273 | 4200 | 26.48 | 94 | 0.22 | down |
| A0A034VR92  | Tropomyosin-2                                                                                 | 32743  | 284  | 57.04 | 17 | 0.22 | down |
| A0A034V520  | Uncharacterized protein                                                                       | 65301  | 610  | 16.89 | 10 | 0.22 | down |
| A0A034WJW3  | Uncharacterized protein                                                                       | 34599  | 300  | 18.33 | 5  | 0.22 | down |
| A0A034V6M3  | 60S ribosomal protein L23a                                                                    | 28521  | 266  | 26.32 | 10 | 0.21 | down |
| A0A034V322  | CD109 antigen                                                                                 | 164963 | 1472 | 4.82  | 6  | 0.21 | down |
| A0A034VJR8  | Endochitinase (Fragment)                                                                      | 69901  | 617  | 7.78  | 4  | 0.21 | down |
| A0A034W8D6  | Ferritin                                                                                      | 25119  | 223  | 52.47 | 9  | 0.21 | down |
| Q86QQ0      | Glutathione S-transferase                                                                     | 23756  | 209  | 37.32 | 6  | 0.21 | down |
| A0A034VSX0  | Phosphate-regulating neutral endopeptidase                                                    | 79759  | 683  | 22.69 | 13 | 0.21 | down |
| A0A034UZZB9 | Sushi, von Willebrand factor type A, EGF and pentraxin domain-containing protein 1 (Fragment) | 127179 | 1152 | 7.46  | 6  | 0.21 | down |
| A0A034V5Q6  | Talin-1 (Fragment)                                                                            | 82628  | 783  | 31.67 | 17 | 0.21 | down |
| A0A034VND6  | Tropomyosin-1, isoforms 33/34 (Fragment)                                                      | 32457  | 282  | 48.58 | 20 | 0.21 | down |
| A0A034VRE0  | Angiotensin-converting enzyme                                                                 | 71478  | 617  | 6.48  | 4  | 0.20 | down |
| A0A034VU99  | Glutathione S-transferase S1                                                                  | 26938  | 240  | 65.83 | 17 | 0.20 | down |
| A0A034WSM6  | Guanine nucleotide-binding protein G(S) subunit alpha                                         | 44569  | 382  | 32.2  | 10 | 0.20 | down |
| A0A034VII9  | Inhibitor of growth protein                                                                   | 44693  | 413  | 13.56 | 4  | 0.20 | down |
| A0A034WF82  | Neurotrimin                                                                                   | 61287  | 550  | 9.45  | 5  | 0.20 | down |
| A0A034VP83  | Poly(U)-specific endoribonuclease-like protein                                                | 71754  | 675  | 24.74 | 13 | 0.20 | down |
| A0A034WJD1  | 3-ketoacyl-CoA thiolase, mitochondrial                                                        | 41809  | 398  | 63.07 | 21 | 0.19 | down |
| A0A034V2V8  | 5-formyltetrahydrofolate cyclo-ligase                                                         | 22678  | 201  | 29.85 | 5  | 0.19 | down |
| A0A034W1X2  | Alaserpin                                                                                     | 44489  | 398  | 27.39 | 10 | 0.19 | down |
| A0A034WRQ2  | Alpha-parvin                                                                                  | 42015  | 366  | 33.06 | 10 | 0.19 | down |
| A0A034W3G0  | Chitinase-like protein Idgf4                                                                  | 48370  | 439  | 68.56 | 20 | 0.19 | down |
| A0A034W8L1  | Flotillin-2                                                                                   | 46568  | 425  | 43.53 | 17 | 0.19 | down |
| A0A034VY88  | Protein hu-li tai shao                                                                        | 76611  | 698  | 69.63 | 35 | 0.19 | down |
| A0A034VIH5  | Protein lap4 (Fragment)                                                                       | 83204  | 783  | 17.5  | 9  | 0.19 | down |

|            |                                                          |        |      |       |    |      |      |
|------------|----------------------------------------------------------|--------|------|-------|----|------|------|
| A0A034VQR8 | Troponin T, skeletal muscle                              | 45988  | 384  | 39.32 | 22 | 0.19 | down |
| A0A034VW95 | Alaserpin (Fragment)                                     | 35699  | 321  | 31.46 | 9  | 0.18 | down |
| A0A034W4R7 | Alpha,alpha-trehalose-phosphate synthase (UDP-forming) A | 91999  | 813  | 33.46 | 24 | 0.18 | down |
| A0A034WI29 | Protein lin-7-like protein B                             | 21479  | 195  | 28.72 | 5  | 0.18 | down |
| A0A034VVP8 | Serpin B9                                                | 56716  | 504  | 29.76 | 14 | 0.18 | down |
| A0A034V946 | Src substrate cortactin (Fragment)                       | 67412  | 601  | 16.97 | 9  | 0.18 | down |
| A0A034W6I6 | Amidophosphoribosyltransferase                           | 57877  | 532  | 14.85 | 7  | 0.17 | down |
| A0A034WI17 | ATP-binding cassette sub-family A member 3               | 36412  | 320  | 15.31 | 4  | 0.17 | down |
| A0A034W8P6 | Protein E(Sev)2B                                         | 24462  | 211  | 43.6  | 9  | 0.17 | down |
| A0A034WR79 | Uncharacterized protein                                  | 24755  | 214  | 59.35 | 13 | 0.17 | down |
| A0A034VTK3 | Chitinase-like protein Idgf5                             | 48605  | 432  | 27.31 | 9  | 0.16 | down |
| A0A034VAR1 | Clavesin-1                                               | 33921  | 293  | 29.35 | 8  | 0.16 | down |
| A0A034VDB5 | Protein lap4 (Fragment)                                  | 101687 | 915  | 20.11 | 14 | 0.16 | down |
| A0A034WT05 | Uncharacterized protein (Fragment)                       | 26868  | 237  | 16.46 | 3  | 0.16 | down |
| A0A034VQ98 | Arylphorin subunit C223 (Fragment)                       | 47837  | 407  | 1.97  | 1  | 0.15 | down |
| A0A034W4H4 | Chitinase-like protein Idgf2                             | 49041  | 438  | 41.55 | 14 | 0.15 | down |
| A0A034WM22 | Multiple inositol polyphosphate phosphatase 1            | 54124  | 467  | 13.7  | 6  | 0.15 | down |
| A0A034VKX8 | Phosphatidylinositol 4-phosphate 5-kinase type-1 alpha   | 86262  | 777  | 6.82  | 4  | 0.15 | down |
| A0A034V6W2 | Short-chain dehydrogenase/reductase family 16C member 6  | 40762  | 376  | 35.11 | 10 | 0.15 | down |
| A0A034V5R2 | Talin-1 (Fragment)                                       | 211049 | 1928 | 48.86 | 69 | 0.15 | down |
| A0A034VLD0 | Xaa-Pro aminopeptidase 2                                 | 80936  | 704  | 25    | 19 | 0.15 | down |
| A0A034VQZ0 | Zinc finger protein 512B                                 | 44855  | 427  | 26.23 | 7  | 0.15 | down |
| A0A034WGA0 | Kin of IRRE-like protein 2 (Fragment)                    | 68865  | 620  | 5.64  | 4  | 0.14 | down |
| A0A034WBA7 | Putative G-protein coupled receptor 158                  | 94535  | 809  | 29.05 | 20 | 0.14 | down |
| A0A034WG07 | Uncharacterized protein                                  | 25352  | 222  | 31.98 | 7  | 0.14 | down |
| A0A034W0B4 | Chitinase-like protein CG5210 (Fragment)                 | 31320  | 279  | 51.25 | 14 | 0.13 | down |
| A0A034W237 | Esterase B1                                              | 64331  | 566  | 14.49 | 6  | 0.13 | down |
| A0A034VJ94 | Glucose dehydrogenase (Acceptor)                         | 68918  | 620  | 11.77 | 6  | 0.13 | down |

|            |                                                      |        |      |       |    |      |      |
|------------|------------------------------------------------------|--------|------|-------|----|------|------|
| A0A034V5I2 | Muscle M-line assembly protein unc-89 (Fragment)     | 213521 | 1922 | 17.9  | 27 | 0.13 | down |
| A0A034WJ51 | Nucleosomal histone kinase 1                         | 70264  | 637  | 13.66 | 7  | 0.13 | down |
| A0A034V5Q1 | Ras suppressor protein 1 (Fragment)                  | 15927  | 138  | 39.86 | 5  | 0.13 | down |
| A0A034VA84 | Uncharacterized protein                              | 57231  | 502  | 22.91 | 10 | 0.13 | down |
| A0A034VBU4 | Uncharacterized protein (Fragment)                   | 72518  | 648  | 11.57 | 7  | 0.13 | down |
| A0A034VKK9 | Alcohol dehydrogenase (NADP(+))                      | 36548  | 324  | 38.89 | 13 | 0.12 | down |
| A0A034V1E0 | Cell surface glycoprotein 1                          | 139929 | 1257 | 15.27 | 17 | 0.12 | down |
| A0A034VYW9 | Contactin                                            | 158548 | 1393 | 25.2  | 27 | 0.12 | down |
| A0A034V9E0 | Gelsolin                                             | 88396  | 789  | 17.36 | 13 | 0.12 | down |
| A0A034VU55 | Integrin-linked protein kinase                       | 50786  | 448  | 32.37 | 14 | 0.12 | down |
| A0A034WVT6 | Membrane metallo-endopeptidase-like 1 (Fragment)     | 82524  | 714  | 22.13 | 14 | 0.12 | down |
| A0A034WC26 | Sarcotoxin-2A                                        | 31053  | 301  | 72.76 | 16 | 0.12 | down |
| A0A034VCQ3 | Uncharacterized protein                              | 127687 | 1161 | 6.46  | 7  | 0.12 | down |
| A0A034WGR6 | Uncharacterized protein                              | 26306  | 231  | 38.53 | 6  | 0.12 | down |
| A0A034V2S6 | Uncharacterized protein                              | 105991 | 944  | 10.7  | 7  | 0.12 | down |
| A0A034V6M6 | Antithrombin-III                                     | 47900  | 422  | 41.47 | 17 | 0.11 | down |
| A0A034WAX0 | Collagen alpha-1(XV) chain                           | 124401 | 1184 | 8.53  | 10 | 0.11 | down |
| A0A034VC57 | Peroxidasin-like protein                             | 155580 | 1384 | 11.49 | 13 | 0.11 | down |
| A0A034VI82 | Tropomodulin                                         | 43782  | 386  | 34.97 | 10 | 0.11 | down |
| A0A034VQI8 | Uncharacterized protein (Fragment)                   | 72191  | 683  | 33.82 | 17 | 0.11 | down |
| A0A034V3K5 | CUB and sushi domain-containing protein 1 (Fragment) | 96461  | 887  | 14.99 | 10 | 0.10 | down |
| A0A034VHH3 | Laminin subunit alpha-1 (Fragment)                   | 188941 | 1677 | 10.26 | 14 | 0.10 | down |
| A0A034VW09 | Protein Skeletor, isoforms B/C                       | 82875  | 741  | 29.82 | 14 | 0.10 | down |
| A0A034V7Q2 | Protein yellow (Fragment)                            | 29702  | 261  | 31.42 | 6  | 0.10 | down |
| A0A034W3W2 | Regucalcin                                           | 32384  | 296  | 42.91 | 12 | 0.10 | down |
| A0A034VEP9 | Tenascin-R (Fragment)                                | 29717  | 257  | 14.79 | 3  | 0.10 | down |
| A0A034VE17 | Uncharacterized protein                              | 27887  | 240  | 26.67 | 6  | 0.10 | down |
| A0A034VIV7 | Uncharacterized protein (Fragment)                   | 15284  | 132  | 12.88 | 2  | 0.10 | down |
| A0A034V8W7 | Cytochrome P450 4g15                                 | 55074  | 484  | 23.76 | 10 | 0.09 | down |
| A0A034VCC3 | Filamin-B (Fragment)                                 | 124654 | 1130 | 5.93  | 7  | 0.09 | down |
| A0A034VIW3 | Homer protein-like protein 2                         | 42349  | 389  | 19.02 | 6  | 0.09 | down |
| A0A034WSV2 | Lamin-C                                              | 70077  | 622  | 56.27 | 37 | 0.09 | down |

|            |                                                  |        |      |       |    |      |      |
|------------|--------------------------------------------------|--------|------|-------|----|------|------|
| A0A034V2U0 | Protein 4.1-like protein                         | 185190 | 1703 | 57.37 | 82 | 0.09 | down |
| A0A034W6R3 | Tissue inhibitor of metalloproteases             | 23428  | 210  | 15.71 | 5  | 0.09 | down |
| A0A034VPE5 | Tropomyosin-1, isoforms 9A/A/B (Fragment)        | 21903  | 188  | 69.68 | 19 | 0.09 | down |
| A0A034VP05 | Uncharacterized protein                          | 103708 | 904  | 6.42  | 6  | 0.09 | down |
| A0A034WAU8 | Uncharacterized protein                          | 73989  | 755  | 7.81  | 4  | 0.09 | down |
| A0A034WH51 | Uncharacterized protein                          | 52329  | 462  | 22.51 | 10 | 0.09 | down |
| A0A034VXK4 | Uncharacterized protein (Fragment)               | 44748  | 431  | 59.63 | 16 | 0.09 | down |
| A0A034VUV3 | Lamin Dm0                                        | 69746  | 617  | 71.64 | 46 | 0.08 | down |
| A0A034W3F0 | Microtubule-associated protein                   | 41229  | 389  | 20.05 | 4  | 0.08 | down |
| A0A034V2D5 | Neurogenic locus notch-like protein 1 (Fragment) | 446774 | 4167 | 1.46  | 5  | 0.08 | down |
| A0A034VJG4 | Neurotactin                                      | 95358  | 871  | 9.87  | 6  | 0.08 | down |
| A0A034VWT9 | Putative cytochrome P450 309a1                   | 58142  | 502  | 13.15 | 6  | 0.08 | down |
| A0A034WF27 | TPPP family protein CG4893                       | 21493  | 201  | 40.3  | 7  | 0.08 | down |
| A0A034VSB5 | Fasciclin-1                                      | 61398  | 542  | 35.42 | 17 | 0.07 | down |
| A0A034WR19 | Sarcocystatin-A                                  | 13543  | 125  | 47.2  | 6  | 0.07 | down |
| A0A034VZZ4 | Uncharacterized protein                          | 16306  | 145  | 17.24 | 2  | 0.07 | down |
| A0A034VAC8 | Uncharacterized protein                          | 95118  | 885  | 8.93  | 8  | 0.07 | down |
| A0A034WHZ8 | Uncharacterized protein (Fragment)               | 53199  | 464  | 21.77 | 12 | 0.07 | down |
| A0A034W3I2 | Zinc finger protein 512B                         | 44649  | 414  | 11.59 | 3  | 0.07 | down |
| A0A034WCQ3 | Carbonic anhydrase 15 (Fragment)                 | 39936  | 350  | 9.71  | 3  | 0.06 | down |
| A0A034VC00 | Collagen alpha-1(IV) chain                       | 185541 | 1833 | 13.04 | 21 | 0.06 | down |
| A0A034WXP8 | Uncharacterized protein                          | 16783  | 153  | 9.15  | 2  | 0.06 | down |
| A0A034VT34 | Angiopoietin-4                                   | 52090  | 454  | 20.04 | 7  | 0.05 | down |
| A0A034WHU4 | Delta-1-pyrroline-5-carboxylate synthase         | 83870  | 773  | 19.79 | 13 | 0.05 | down |
| A0A034VWI9 | General odorant-binding protein 99a (Fragment)   | 20372  | 176  | 18.18 | 4  | 0.05 | down |
| I1T1H2     | Heat shock protein 20                            | 18932  | 170  | 67.65 | 10 | 0.05 | down |
| A0A034W9Y1 | Larval cuticle protein A2B                       | 24482  | 250  | 92.4  | 19 | 0.05 | down |
| A0A034W4Q0 | Larval cuticle protein A2B (Fragment)            | 18617  | 180  | 73.89 | 17 | 0.05 | down |
| A0A034VU29 | Regucalcin                                       | 39454  | 351  | 64.96 | 26 | 0.05 | down |
| A0A034VGV7 | Uncharacterized protein                          | 89626  | 838  | 31.5  | 19 | 0.05 | down |
| A0A034VSZ7 | Uncharacterized protein                          | 26073  | 229  | 47.16 | 13 | 0.05 | down |
| A0A034WC07 | Uncharacterized protein                          | 24901  | 219  | 23.74 | 4  | 0.05 | down |

|            |                                               |        |      |       |    |      |      |
|------------|-----------------------------------------------|--------|------|-------|----|------|------|
| A0A034VZ11 | Uncharacterized protein (Fragment)            | 21843  | 231  | 27.71 | 5  | 0.05 | down |
| A0A034V3D6 | J domain-containing protein                   | 19631  | 177  | 70.62 | 15 | 0.04 | down |
| A0A034VM08 | Uncharacterized protein                       | 62881  | 556  | 59.71 | 40 | 0.04 | down |
| A0A034WP07 | Attacin-A                                     | 25021  | 239  | 72.8  | 14 | 0.03 | down |
| A0A034WL03 | Development-specific 25 kDa protein           | 28860  | 259  | 69.5  | 19 | 0.03 | down |
| A0A034W0D7 | Endocuticle structural glycoprotein ABD-4     | 14232  | 135  | 51.85 | 4  | 0.03 | down |
| A0A034WXX0 | Histone H1                                    | 24996  | 240  | 30.83 | 11 | 0.03 | down |
| A0A034WSW4 | Larval cuticle protein 8                      | 11478  | 104  | 22.12 | 2  | 0.03 | down |
| A0A034W585 | Larval cuticle protein A3A                    | 14397  | 138  | 75.36 | 17 | 0.03 | down |
| A0A034WGB5 | Uncharacterized protein                       | 25308  | 221  | 55.2  | 12 | 0.03 | down |
| A0A034WFT6 | Uncharacterized protein                       | 19920  | 195  | 59.49 | 14 | 0.03 | down |
| A0A034VBG9 | Uncharacterized protein                       | 23773  | 229  | 65.07 | 16 | 0.03 | down |
| A0A034V3B3 | Arylphorin subunit A4 (Fragment)              | 140432 | 1224 | 45.92 | 55 | 0.02 | down |
| A0A034WJQ4 | Fat-body protein 1 (Fragment)                 | 58417  | 511  | 48.53 | 31 | 0.02 | down |
| A0A034V6N3 | High mobility group protein Z                 | 12805  | 112  | 33.04 | 5  | 0.02 | down |
| A0A034VYM4 | Larval serum protein 1 gamma chain (Fragment) | 92074  | 773  | 31.31 | 27 | 0.02 | down |
| A0A034W7C2 | Uncharacterized protein                       | 26739  | 235  | 43.83 | 10 | 0.02 | down |



**Table S2.** Proteins differentially expressed between 6- and 9-day-old ovaries of *Bactrocera dorsalis*.

| Accession Number | Annotation                                                                 | Protein Mass | Protein Length | Sequence Coverage | Peptides | Fold Change | Difference |
|------------------|----------------------------------------------------------------------------|--------------|----------------|-------------------|----------|-------------|------------|
| A0A034WP50       | Chorion protein S36 (Fragment)                                             | 24308        | 233            | 54.08             | 10       | 15.69       | up         |
| A0A034WSH3       | Uncharacterized protein (Fragment)                                         | 18283        | 185            | 41.62             | 4        | 15.21       | up         |
| A0A034W023       | Uncharacterized protein                                                    | 43192        | 377            | 29.97             | 11       | 9.01        | up         |
| A0A034WJD1       | 3-ketoacyl-CoA thiolase, mitochondrial                                     | 41809        | 398            | 63.07             | 21       | 8.87        | up         |
| A0A034VSB5       | Fasciclin-1                                                                | 61398        | 542            | 35.42             | 17       | 8.35        | up         |
| A0A034VMV0       | Putative 4-coumarate--CoA ligase 3                                         | 65064        | 587            | 29.64             | 13       | 7.50        | up         |
| A0A034VBU8       | Uncharacterized protein (Fragment)                                         | 39869        | 352            | 32.95             | 8        | 6.86        | up         |
| A0A034V6M6       | Antithrombin-III                                                           | 47900        | 422            | 41.47             | 17       | 6.67        | up         |
| A0A034W2K6       | Major royal jelly protein 1                                                | 47088        | 425            | 40.24             | 14       | 6.50        | up         |
| A0A034VUE5       | Myotubularin-related protein 14                                            | 85100        | 765            | 30.59             | 18       | 6.21        | up         |
| A0A034VDF9       | Uncharacterized protein (Fragment)                                         | 73996        | 639            | 28.64             | 13       | 6.14        | up         |
| A0A034WN56       | Ubiquitin-like domain-containing CTD phosphatase 1                         | 39155        | 334            | 31.74             | 9        | 6.07        | up         |
| A0A059XRL4       | Ferritin                                                                   | 23169        | 204            | 56.86             | 10       | 5.97        | up         |
| G9F9Y5           | Chitinase                                                                  | 54275        | 483            | 24.43             | 8        | 5.86        | up         |
| A0A034WB53       | Cullin-5 (Fragment)                                                        | 97906        | 850            | 16.24             | 12       | 5.75        | up         |
| A0A034VLB6       | Ubiquitin-conjugating enzyme E2 C (Fragment)                               | 12197        | 113            | 64.60             | 5        | 5.03        | up         |
| A0A034VCJ1       | Malic enzyme                                                               | 95358        | 869            | 53.74             | 39       | 4.85        | up         |
| A0A034V7D4       | Microsomal triglyceride transfer protein large subunit (Fragment)          | 82310        | 737            | 34.60             | 24       | 4.82        | up         |
| A0A034WER3       | Putative medium-chain specific acyl-CoA dehydrogenase, mitochondrial       | 45928        | 418            | 53.83             | 28       | 4.81        | up         |
| A0A034VAA7       | Centrosomin (Fragment)                                                     | 112702       | 992            | 10.58             | 8        | 4.80        | up         |
| A0A034W4S7       | Succinyl-CoA:3-ketoacid coenzyme A transferase 1, mitochondrial (Fragment) | 33458        | 309            | 32.04             | 7        | 4.79        | up         |
| A0A034W9D5       | Glutaminy-peptide cyclotransferase-like protein                            | 37294        | 330            | 15.45             | 5        | 4.79        | up         |
| A0A034VAS8       | Trifunctional enzyme subunit alpha, mitochondrial                          | 83448        | 770            | 45.84             | 28       | 4.79        | up         |
| A0A034WRP5       | Aminopeptidase N (Fragment)                                                | 69091        | 586            | 12.46             | 6        | 4.65        | up         |
| A0A034VKU6       | Myotubularin-related protein 3                                             | 139934       | 1279           | 17.98             | 18       | 4.51        | up         |
| A0A034WT22       | Uncharacterized protein                                                    | 32198        | 290            | 21.72             | 6        | 4.50        | up         |
| A0A034WJ30       | Uncharacterized protein                                                    | 38270        | 326            | 23.01             | 6        | 4.41        | up         |
| A0A034W382       | Peroxiredoxin 1                                                            | 21784        | 194            | 68.56             | 15       | 4.26        | up         |

|            |                                                                   |        |      |       |    |      |    |
|------------|-------------------------------------------------------------------|--------|------|-------|----|------|----|
| A0A034VXX3 | Uncharacterized protein                                           | 38416  | 353  | 40.51 | 10 | 4.25 | up |
| A0A034WCE7 | Insulin receptor                                                  | 109284 | 963  | 30.43 | 21 | 4.24 | up |
| A0A034VVU8 | Muskelin                                                          | 101135 | 890  | 38.20 | 32 | 4.04 | up |
| A0A034W7B3 | Uncharacterized protein                                           | 45156  | 395  | 40.25 | 15 | 3.98 | up |
| A0A034VU99 | Glutathione S-transferase S1                                      | 26938  | 240  | 65.83 | 17 | 3.92 | up |
| A0A034WC12 | Cytosolic endo-beta-N-acetylglucosaminidase                       | 70022  | 604  | 30.30 | 15 | 3.88 | up |
| A0A034W3G0 | Chitinase-like protein Idgf4                                      | 48370  | 439  | 68.56 | 20 | 3.85 | up |
| A0A034W030 | MAP kinase-activating death domain protein (Fragment)             | 239912 | 2175 | 7.72  | 13 | 3.84 | up |
| A0A034WF11 | Trifunctional enzyme subunit beta, mitochondrial                  | 52447  | 483  | 46.79 | 19 | 3.84 | up |
| A0A034WHL8 | Venom carboxylesterase-6                                          | 62660  | 549  | 25.14 | 12 | 3.84 | up |
| A0A034WBX7 | Ribonucleoside-diphosphate reductase                              | 90971  | 804  | 46.27 | 34 | 3.83 | up |
| A0A034VQ97 | CD109 antigen                                                     | 159290 | 1430 | 30.49 | 39 | 3.78 | up |
| A0A034W812 | Importin subunit alpha                                            | 57164  | 520  | 63.65 | 22 | 3.62 | up |
| A0A034V8K5 | Aminopeptidase N                                                  | 119690 | 1035 | 19.81 | 16 | 3.55 | up |
| A0A034V1H8 | Filamin-A (Fragment)                                              | 141569 | 1301 | 54.04 | 58 | 3.54 | up |
| A0A034VRJ4 | Neutral alpha-glucosidase AB (Fragment)                           | 51947  | 449  | 45.88 | 18 | 3.50 | up |
| A0A034VI38 | Lysosomal acid phosphatase                                        | 55250  | 477  | 33.75 | 12 | 3.49 | up |
| A0A034VMU5 | Flap endonuclease 1                                               | 42981  | 382  | 26.44 | 8  | 3.48 | up |
| A0A034VRV3 | Mitogen-activated protein kinase kinase kinase 15 (Fragment)      | 58729  | 508  | 10.63 | 5  | 3.48 | up |
| A0A034WNV7 | Peptide transporter family 1                                      | 78097  | 706  | 13.46 | 8  | 3.47 | up |
| A0A034W7H6 | Cyclin-dependent kinase 5-like protein                            | 33341  | 293  | 14.68 | 4  | 3.46 | up |
| A0A034WSJ2 | Membrane-associated progesterone receptor component 2             | 25529  | 231  | 40.26 | 8  | 3.45 | up |
| A0A034W1D2 | UDP-glucuronosyltransferase 1-1 (Fragment)                        | 74468  | 640  | 8.59  | 5  | 3.44 | up |
| A0A034V1F4 | Low-density lipoprotein receptor-related protein 2 (Fragment)     | 187971 | 1677 | 7.39  | 9  | 3.44 | up |
| A0A034VLY5 | V-type proton ATPase subunit S1                                   | 43114  | 388  | 30.15 | 9  | 3.42 | up |
| A0A034WMH1 | S-formylglutathione hydrolase                                     | 34158  | 305  | 45.25 | 10 | 3.41 | up |
| A0A034V463 | Low-density lipoprotein receptor-related protein 2 (Fragment)     | 341567 | 3066 | 10.89 | 28 | 3.39 | up |
| A0A034V5Q6 | Talin-1 (Fragment)                                                | 82628  | 783  | 31.67 | 17 | 3.34 | up |
| A0A034V5J3 | Glycerophosphocholine phosphodiesterase GPCPD1                    | 74362  | 657  | 20.24 | 10 | 3.24 | up |
| A0A034W3Z9 | Vesicle-associated membrane protein/synaptobrevin-binding protein | 28696  | 247  | 55.47 | 10 | 3.19 | up |
| A0A034V5R2 | Talin-1 (Fragment)                                                | 211049 | 1928 | 48.86 | 69 | 3.15 | up |

|            |                                                                                  |        |      |       |    |      |    |
|------------|----------------------------------------------------------------------------------|--------|------|-------|----|------|----|
| A0A034WA61 | Maltase A3                                                                       | 71388  | 623  | 35.79 | 19 | 3.06 | up |
| A0A034W647 | Peptidyl-prolyl cis-trans isomerase D                                            | 51319  | 442  | 34.62 | 15 | 2.98 | up |
| A0A034WDN8 | Cytosolic non-specific dipeptidase                                               | 53660  | 479  | 55.95 | 21 | 2.91 | up |
| A0A034W865 | Gamma-tubulin complex component 3-like protein                                   | 107662 | 951  | 19.77 | 15 | 2.88 | up |
| A0A034WSR6 | Defective chorion-1 protein (Fragment)                                           | 79162  | 723  | 28.49 | 25 | 2.80 | up |
| A0A034VEW6 | Glyceraldehyde-3-phosphate dehydrogenase                                         | 35597  | 332  | 81.02 | 25 | 2.74 | up |
| A0A034VIB7 | Protein phosphatase 1B                                                           | 41338  | 370  | 40.54 | 13 | 2.73 | up |
| A0A034WNA4 | GMP synthase (Glutamine-hydrolyzing)                                             | 76303  | 683  | 53.44 | 30 | 2.68 | up |
| A0A034W397 | Dual specificity mitogen-activated protein kinase kinase dSOR1                   | 44030  | 397  | 44.58 | 18 | 2.67 | up |
| A0A034V2C6 | Serine/threonine-protein kinase Warts (Fragment)                                 | 68956  | 610  | 16.23 | 7  | 2.66 | up |
| A0A034W787 | Juvenile hormone epoxide hydrolase 1                                             | 52625  | 459  | 32.46 | 18 | 2.64 | up |
| A0A034VS29 | DNA mismatch repair protein MSH6                                                 | 133796 | 1187 | 25.11 | 24 | 2.62 | up |
| A0A034V3F4 | Tripeptidyl-peptidase 2                                                          | 149295 | 1353 | 47.97 | 54 | 2.61 | up |
| A0A034VFZ2 | Esterase FE4                                                                     | 66231  | 589  | 32.43 | 15 | 2.57 | up |
| A0A034VZV8 | Chorion peroxidase                                                               | 94126  | 836  | 40.31 | 29 | 2.56 | up |
| A0A034WVC4 | UDP-N-acetylglucosamine--peptide N-acetylglucosaminyltransferase 110 kDa subunit | 118456 | 1061 | 30.63 | 22 | 2.48 | up |
| A0A034WAP1 | Beta-ureidopropionase                                                            | 43439  | 385  | 41.30 | 11 | 2.41 | up |
| A0A034VXA2 | Tubulin alpha-4 chain                                                            | 51222  | 462  | 54.76 | 20 | 2.37 | up |
| A0A034VIE8 | Sulfhydryl oxidase                                                               | 72338  | 640  | 31.09 | 12 | 2.35 | up |
| A0A034VKF8 | Cysteine and histidine-rich protein 1-like protein                               | 49166  | 447  | 30.20 | 10 | 2.34 | up |
| A0A034VFK7 | Nuclear pore membrane glycoprotein 210                                           | 212907 | 1902 | 25.34 | 41 | 2.34 | up |
| A0A034VMD8 | Cytoskeleton-associated protein 5 (Fragment)                                     | 135423 | 1227 | 26.57 | 26 | 2.26 | up |
| A0A034W4A7 | Glutathione S-transferase 1-1                                                    | 23716  | 207  | 49.76 | 11 | 2.26 | up |
| A0A034WBQ5 | Alpha-1,4 glucan phosphorylase                                                   | 97349  | 845  | 61.07 | 50 | 2.20 | up |
| A0A034VJU9 | 85/88 kDa calcium-independent phospholipase A2                                   | 96050  | 872  | 23.28 | 19 | 2.17 | up |
| A0A034VKB5 | Glucose-6-phosphate isomerase                                                    | 62234  | 558  | 55.38 | 24 | 2.16 | up |
| A0A034V6L1 | Signal transducer and activator of transcription                                 | 84585  | 737  | 20.76 | 14 | 2.12 | up |
| A0A034VU54 | Neuroserpin (Fragment)                                                           | 50223  | 451  | 37.47 | 14 | 2.12 | up |
| A0A034W7N0 | Protein NASP-like protein                                                        | 46397  | 427  | 41.22 | 15 | 2.11 | up |
| A0A034VV21 | Nuclear pore complex protein Nup205 (Fragment)                                   | 124867 | 1088 | 22.79 | 20 | 2.11 | up |
| A0A034VC08 | Xaa-Pro dipeptidase                                                              | 53654  | 480  | 42.29 | 18 | 2.09 | up |
| A0A034WMG0 | Ubiquitin carboxyl-terminal hydrolase                                            | 128892 | 1110 | 31.08 | 29 | 2.08 | up |
| A0A034V4Z0 | Uncharacterized protein                                                          | 213808 | 1884 | 10.35 | 18 | 2.07 | up |

|             |                                                              |        |      |       |    |      |      |
|-------------|--------------------------------------------------------------|--------|------|-------|----|------|------|
| A0A034VK02  | Dihydrolipoyl dehydrogenase                                  | 53044  | 504  | 58.33 | 26 | 1.98 | up   |
| A0A034UZ33  | Importin subunit beta                                        | 98887  | 885  | 37.51 | 26 | 1.94 | up   |
| A0A034WQ10  | Cullin-4A                                                    | 97155  | 841  | 27.59 | 20 | 1.92 | up   |
| A0A034WUY1  | Ubiquitin carboxyl-terminal hydrolase                        | 25481  | 227  | 74.89 | 11 | 1.90 | up   |
| A0A034WAG6  | Ran GTPase-activating protein                                | 64995  | 587  | 34.07 | 19 | 1.87 | up   |
| A0A034WID4  | Putative cation-transporting ATPase 13A1                     | 136813 | 1216 | 18.67 | 19 | 1.79 | up   |
| A0A034WDU4  | Endoplasmin                                                  | 91351  | 797  | 56.21 | 46 | 1.74 | up   |
| A0A034VK16  | Cytoskeleton-associated protein 5 (Fragment)                 | 79847  | 734  | 32.70 | 20 | 1.69 | up   |
| A0A034WDM9  | 26S protease regulatory subunit 6A                           | 47779  | 428  | 63.55 | 25 | 1.68 | up   |
| A0A034VG52  | Adenosylhomocysteinase                                       | 56004  | 509  | 53.24 | 23 | 1.66 | up   |
| A0A034VPR3  | Elongation factor Tu GTP-binding domain-containing protein 1 | 116814 | 1043 | 31.06 | 28 | 1.62 | up   |
| A0A034V085  | Proteasome-associated protein ECM29-like protein             | 212089 | 1889 | 26.95 | 41 | 1.60 | up   |
| A0A034WBQ4  | Putative ATP-dependent RNA helicase CG8611 (Fragment)        | 94276  | 841  | 17.24 | 12 | 0.62 | down |
| A0A034VFT5  | tRNA (Cytosine(34)-C(5))-methyltransferase                   | 82282  | 728  | 33.52 | 16 | 0.57 | down |
| A0A034WIR4  | DnaJ-like protein subfamily C member 2                       | 72239  | 618  | 28.48 | 14 | 0.56 | down |
| A0A034WW15  | 40S ribosomal protein S3                                     | 27365  | 244  | 80.33 | 26 | 0.54 | down |
| A0A034VGJ1  | Clustered mitochondria protein homolog                       | 153417 | 1362 | 30.54 | 35 | 0.53 | down |
| A0A034WDZ9  | Importin-5                                                   | 123792 | 1106 | 53.35 | 47 | 0.53 | down |
| A0A034WLA5  | ATP-dependent RNA helicase vasa, isoform A                   | 67940  | 621  | 57.49 | 35 | 0.51 | down |
| A0A034V813  | Acetyl-CoA carboxylase                                       | 270348 | 2391 | 34.84 | 58 | 0.51 | down |
| A0A034W8Z3  | Putative ATP-dependent RNA helicase DDX43                    | 74677  | 662  | 47.28 | 27 | 0.51 | down |
| A0A034WFM3  | 60S ribosomal protein L3                                     | 46663  | 413  | 50.36 | 26 | 0.51 | down |
| A0A034VH70  | La-related protein (Fragment)                                | 132976 | 1206 | 24.71 | 20 | 0.50 | down |
| A0A034VPD5  | Villin-like protein quail                                    | 103012 | 895  | 18.21 | 13 | 0.49 | down |
| A0A034VGU8  | Eukaryotic translation initiation factor 2 subunit 3         | 51705  | 475  | 45.68 | 16 | 0.49 | down |
| A0A034W6X9  | GTP-binding protein 128up                                    | 41005  | 368  | 52.45 | 16 | 0.48 | down |
| A0A034VFFV1 | Cytosolic 10-formyltetrahydrofolate dehydrogenase (Fragment) | 75060  | 687  | 47.02 | 23 | 0.48 | down |
| A0A034UZI7  | Midasin (Fragment)                                           | 430710 | 3762 | 6.01  | 20 | 0.48 | down |
| A0A034V6Q5  | mRNA turnover protein 4-like protein                         | 29891  | 257  | 28.79 | 8  | 0.47 | down |
| W5ZSP5      | Dicer2                                                       | 192043 | 1672 | 24.88 | 36 | 0.47 | down |
| A0A034VFE7  | Far upstream element-binding protein 2                       | 82953  | 794  | 23.68 | 16 | 0.47 | down |
| A0A034WCL6  | Peptidyl-prolyl cis-trans isomerase FKBP6 (Fragment)         | 54511  | 478  | 43.93 | 16 | 0.46 | down |

|            |                                                                   |        |      |       |    |      |      |
|------------|-------------------------------------------------------------------|--------|------|-------|----|------|------|
| A0A034VZY9 | Heat shock 70 kDa protein 4                                       | 89947  | 810  | 60.25 | 44 | 0.45 | down |
| A0A034VMS2 | Peptide methionine sulfoxide reductase                            | 27545  | 243  | 29.63 | 6  | 0.45 | down |
| A0A034W0U6 | Pre-rRNA-processing protein TSR1-like protein                     | 86592  | 756  | 18.92 | 13 | 0.45 | down |
| A0A034VLD7 | Peptidyl-prolyl cis-trans isomerase                               | 111376 | 996  | 27.61 | 25 | 0.44 | down |
| A0A034W524 | Annexin                                                           | 36449  | 322  | 44.41 | 13 | 0.44 | down |
| A0A034VJX4 | Very long-chain-fatty-acid--CoA ligase bubblegum                  | 74013  | 666  | 30.33 | 15 | 0.43 | down |
| A0A034VBD0 | Putative ATP-dependent RNA helicase DDX5                          | 79548  | 732  | 30.60 | 18 | 0.43 | down |
| A0A034VGS8 | Tubulin beta-3 chain                                              | 50889  | 454  | 60.79 | 27 | 0.42 | down |
| A0A034VN85 | Eukaryotic translation initiation factor 3 subunit E              | 50964  | 434  | 38.71 | 15 | 0.42 | down |
| A0A034VER3 | Eukaryotic translation initiation factor 3 subunit C              | 108335 | 923  | 37.92 | 32 | 0.42 | down |
| A0A034WST6 | Selenide, water dikinase                                          | 43668  | 400  | 52.25 | 17 | 0.42 | down |
| A0A034WKB0 | 40S ribosomal protein S5a                                         | 25415  | 227  | 32.60 | 7  | 0.42 | down |
| A0A034WA29 | Aspartate--tRNA ligase, mitochondrial                             | 120485 | 1077 | 30.64 | 29 | 0.41 | down |
| A0A034WTX8 | Pescadillo-like protein (Fragment)                                | 72609  | 613  | 8.97  | 5  | 0.41 | down |
| A0A034VYR3 | Nucleolar protein 58                                              | 81673  | 728  | 43.82 | 30 | 0.41 | down |
| A0A034VWU6 | La protein-like protein                                           | 48148  | 413  | 40.19 | 15 | 0.41 | down |
| A0A034WMJ8 | 40S ribosomal protein S4 (Fragment)                               | 31529  | 280  | 59.29 | 23 | 0.41 | down |
| A0A034WLF6 | FK506-binding protein 59                                          | 48986  | 437  | 59.27 | 29 | 0.41 | down |
| A0A034W3W4 | Calponin                                                          | 19151  | 169  | 71.01 | 13 | 0.40 | down |
| A0A034VAP8 | Eukaryotic initiation factor 4A-III                               | 46062  | 402  | 31.59 | 14 | 0.39 | down |
| A0A034VQT4 | DNA topoisomerase 1                                               | 115728 | 1000 | 7.10  | 7  | 0.39 | down |
| A0A034VV96 | Symplekin                                                         | 133220 | 1175 | 8.17  | 7  | 0.39 | down |
| A0A034V7Y9 | Eukaryotic peptide chain release factor GTP-binding subunit ERF3A | 66511  | 616  | 42.37 | 25 | 0.39 | down |
| A0A034W3J9 | Calnexin                                                          | 69222  | 616  | 23.21 | 12 | 0.38 | down |
| A0A034W1D4 | Hepatoma-derived growth factor                                    | 61550  | 545  | 30.09 | 15 | 0.38 | down |
| A0A034W954 | Protein RRP5-like protein                                         | 163045 | 1433 | 17.52 | 19 | 0.37 | down |
| A0A034V9A3 | CUGBP Elav-like family member 2                                   | 62542  | 587  | 25.55 | 13 | 0.37 | down |
| A0A034VKH4 | Innexin                                                           | 42257  | 365  | 23.29 | 9  | 0.36 | down |
| A0A034VJF0 | Ribosome biogenesis protein BOP1 homolog                          | 97678  | 845  | 19.05 | 12 | 0.35 | down |
| A0A034VH20 | Piwi-like protein                                                 | 102440 | 900  | 49.56 | 37 | 0.35 | down |
| A0A034VB23 | RRP12-like protein                                                | 154813 | 1385 | 12.92 | 16 | 0.35 | down |
| A0A034VQY4 | Protein bric-a-brac 2                                             | 101626 | 929  | 17.01 | 11 | 0.35 | down |
| A0A034VX01 | DNA-binding protein modulo (Fragment)                             | 65113  | 578  | 37.89 | 22 | 0.35 | down |
| A0A034V5U3 | Staphylococcal nuclease domain-containing protein 1               | 103711 | 928  | 64.12 | 47 | 0.35 | down |

|            |                                                                   |        |      |       |    |      |      |
|------------|-------------------------------------------------------------------|--------|------|-------|----|------|------|
| A0A034WKG9 | Ecdysteroid UDP-glucosyltransferase                               | 62370  | 549  | 24.77 | 10 | 0.35 | down |
| A0A034VQG9 | Protein penguin                                                   | 79228  | 703  | 17.64 | 11 | 0.35 | down |
| A0A034V4U2 | Putative ATP-dependent RNA helicase spindle-E (Fragment)          | 82430  | 722  | 32.55 | 19 | 0.34 | down |
| A0A034WPR9 | Asparagine synthetase                                             | 63212  | 557  | 11.85 | 6  | 0.33 | down |
| A0A034VGV1 | Tudor domain-containing protein 1 (Fragment)                      | 136071 | 1183 | 24.09 | 23 | 0.32 | down |
| A0A034WRG8 | Putative ribosomal RNA methyltransferase NOP2                     | 93568  | 812  | 16.87 | 11 | 0.32 | down |
| A0A034W2L3 | Citrate synthase (Fragment)                                       | 28581  | 257  | 63.42 | 15 | 0.31 | down |
| A0A034V7N4 | Myosin heavy chain 95F                                            | 141826 | 1240 | 28.63 | 32 | 0.30 | down |
| A0A034WGD2 | Ribosomal L1 domain-containing protein CG13096 (Fragment)         | 68771  | 608  | 32.07 | 18 | 0.29 | down |
| A0A034VD80 | RNA-binding protein squid (Fragment)                              | 30830  | 281  | 59.07 | 14 | 0.28 | down |
| A0A034WSY7 | Nucleolar GTP-binding protein 1                                   | 75319  | 651  | 23.04 | 13 | 0.28 | down |
| A0A034WPS6 | Inositol-3-phosphate synthase                                     | 62553  | 568  | 42.96 | 18 | 0.27 | down |
| A0A034VSG4 | Maternal protein exuperantia                                      | 55182  | 495  | 51.11 | 26 | 0.27 | down |
| A0A034VY07 | Nucleolar protein 56                                              | 57438  | 512  | 34.18 | 13 | 0.26 | down |
| A0A034VTB7 | Uncharacterized protein                                           | 47334  | 421  | 42.76 | 12 | 0.26 | down |
| A0A034WTE5 | Trans-1,2-dihydrobenzene-1,2-diol dehydrogenase                   | 37022  | 332  | 35.24 | 13 | 0.25 | down |
| A0A034VYF9 | Paramyosin, long form                                             | 102321 | 879  | 53.70 | 41 | 0.25 | down |
| A0A034VCY4 | Tudor domain-containing protein 7 (Fragment)                      | 108951 | 956  | 25.63 | 18 | 0.25 | down |
| A0A034VR52 | Procollagen-lysine,2-oxoglutarate 5-dioxygenase 1                 | 85847  | 743  | 24.23 | 18 | 0.24 | down |
| A0A034WS42 | Histone H4                                                        | 11382  | 103  | 65.05 | 15 | 0.24 | down |
| A0A034WJE4 | Transcription elongation factor SPT5                              | 120771 | 1090 | 16.24 | 13 | 0.24 | down |
| A0A034WJ92 | Protein piwi (Fragment)                                           | 78854  | 688  | 51.45 | 37 | 0.24 | down |
| A0A034WUE5 | Ribosome production factor 2-like protein                         | 36400  | 314  | 30.25 | 9  | 0.23 | down |
| A0A034WNU4 | H/ACA ribonucleoprotein complex subunit 2-like protein            | 17742  | 159  | 43.40 | 5  | 0.23 | down |
| A0A034WST2 | ATP-dependent RNA helicase WM6                                    | 48520  | 423  | 55.08 | 22 | 0.23 | down |
| A0A034VR92 | Tropomyosin-2                                                     | 32743  | 284  | 57.04 | 17 | 0.22 | down |
| A0A034W3Y6 | RNA-binding protein 1                                             | 16004  | 142  | 30.99 | 6  | 0.22 | down |
| A0A034VA48 | Prolyl 4-hydroxylase subunit alpha-2                              | 64303  | 561  | 23.53 | 9  | 0.21 | down |
| A0A034V087 | Guanine nucleotide-binding-like protein 3-like protein (Fragment) | 69470  | 610  | 29.02 | 16 | 0.20 | down |
| A0A034WG23 | ATP-dependent RNA helicase p62                                    | 81987  | 757  | 51.12 | 31 | 0.20 | down |
| A0A034WL04 | RNA-binding protein lark                                          | 38612  | 338  | 47.34 | 15 | 0.20 | down |
| A0A034WNF6 | Importin subunit alpha                                            | 57681  | 519  | 29.09 | 12 | 0.19 | down |

|            |                                                             |        |     |       |    |      |      |
|------------|-------------------------------------------------------------|--------|-----|-------|----|------|------|
| A0A034VUY6 | Methenyltetrahydrofolate synthase domain-containing protein | 59463  | 538 | 56.51 | 32 | 0.16 | down |
| A0A034V1Z3 | Atlastin (Fragment)                                         | 91611  | 791 | 48.93 | 37 | 0.16 | down |
| A0A034WHQ6 | Nucleolar GTP-binding protein 2                             | 77079  | 674 | 15.73 | 9  | 0.16 | down |
| A0A034VSE8 | Serrate RNA effector molecule-like protein                  | 113786 | 997 | 19.16 | 17 | 0.11 | down |
| A0A034WUS8 | Protein maelstrom                                           | 58096  | 514 | 17.90 | 7  | 0.10 | down |
| A0A034UX56 | Trehalose 6-phosphate phosphatase                           | 31189  | 274 | 81.75 | 25 | 0.08 | down |

**Table S3.** Proteins differentially expressed between 1- and 9-day-old ovaries of *Bactrocera dorsalis*.

| Accession Number | Annotation                                      | Protein Mass | Protein Length | Sequence Coverage | Peptides | Fold Change | Difference |
|------------------|-------------------------------------------------|--------------|----------------|-------------------|----------|-------------|------------|
| A0A034WA19       | Chorion protein S38                             | 27957        | 283            | 32.51             | 8        | 48.89       | up         |
| A0A034WSR6       | Defective chorion-1 protein (Fragment)          | 79162        | 723            | 28.49             | 25       | 45.64       | up         |
| A0A034WP50       | Chorion protein S36 (Fragment)                  | 24308        | 233            | 54.08             | 10       | 36.76       | up         |
| A0A034WHP3       | Vitelline membrane protein Vm26Aa               | 11467        | 114            | 82.46             | 16       | 35.57       | up         |
| A0A034VWY8       | Fatty-acid amide hydrolase 2                    | 58853        | 530            | 40.94             | 20       | 34.15       | up         |
| A0A034WSH3       | Uncharacterized protein (Fragment)              | 18283        | 185            | 41.62             | 4        | 33.82       | up         |
| A0A034WY57       | Putative ATP-dependent RNA helicase me31b       | 51888        | 457            | 77.46             | 46       | 32.45       | up         |
| A0A034W023       | Uncharacterized protein                         | 43192        | 377            | 29.97             | 11       | 31.16       | up         |
| A0A034V1T8       | Putative vitellogenin receptor                  | 214000       | 1923           | 36.45             | 58       | 30.29       | up         |
| A0A034VQJ3       | Vitellogenin-1                                  | 47853        | 436            | 83.26             | 82       | 29.72       | up         |
| A0A034VUE5       | Myotubularin-related protein 14                 | 85100        | 765            | 30.59             | 18       | 29.22       | up         |
| A0A034VE18       | Heat shock protein 23                           | 18967        | 170            | 78.82             | 15       | 29.02       | up         |
| A0A034W787       | Juvenile hormone epoxide hydrolase 1            | 52625        | 459            | 32.46             | 18       | 26.88       | up         |
| A0A034W812       | Importin subunit alpha                          | 57164        | 520            | 63.65             | 22       | 26.60       | up         |
| A0A034VXX3       | Uncharacterized protein                         | 38416        | 353            | 40.51             | 10       | 26.18       | up         |
| A0A034W7B3       | Uncharacterized protein                         | 45156        | 395            | 40.25             | 15       | 25.66       | up         |
| A0A034WRE4       | 60S ribosomal protein L30                       | 12248        | 111            | 60.36             | 9        | 23.90       | up         |
| A0A034V5D1       | Chorion protein S16                             | 14769        | 144            | 24.31             | 5        | 23.56       | up         |
| A0A034V196       | Protein disulfide-isomerase                     | 15091        | 135            | 51.85             | 6        | 23.15       | up         |
| Q8T7E3           | Vitellogenin 1                                  | 47781        | 436            | 83.26             | 77       | 21.25       | up         |
| A0A034VDF9       | Uncharacterized protein (Fragment)              | 73996        | 639            | 28.64             | 13       | 21.09       | up         |
| A0A034VZV8       | Chorion peroxidase                              | 94126        | 836            | 40.31             | 29       | 20.11       | up         |
| A0A034W6U8       | Glucose dehydrogenase (Acceptor)                | 71439        | 633            | 21.48             | 10       | 19.74       | up         |
| A0A034WNR3       | 46 kDa FK506-binding nuclear protein (Fragment) | 20602        | 180            | 28.89             | 4        | 19.57       | up         |
| A0A034WWC1       | General odorant-binding protein 99b             | 16792        | 143            | 49.65             | 10       | 19.36       | up         |

|            |                                                       |        |      |       |    |       |    |
|------------|-------------------------------------------------------|--------|------|-------|----|-------|----|
| A0A034V1J5 | Uncharacterized protein (Fragment)                    | 54156  | 481  | 19.33 | 8  | 18.28 | up |
| A0A034VVU8 | Muskelin                                              | 101135 | 890  | 38.20 | 32 | 17.65 | up |
| A0A034W030 | MAP kinase-activating death domain protein (Fragment) | 239912 | 2175 | 7.72  | 13 | 17.31 | up |
| A0A034UZ33 | Importin subunit beta                                 | 98887  | 885  | 37.51 | 26 | 16.20 | up |
| A7YVH6     | Cytochrome b                                          | 43024  | 378  | 2.38  | 1  | 15.96 | up |
| A0A034VP94 | 40S ribosomal protein S12                             | 15218  | 139  | 84.17 | 16 | 15.62 | up |
| A0A034V4Z0 | Uncharacterized protein                               | 213808 | 1884 | 10.35 | 18 | 15.53 | up |
| A0A034W432 | Cytochrome P450 306a1                                 | 63391  | 545  | 40.92 | 19 | 15.43 | up |
| A0A034WEA0 | FAM203 family protein CG6073                          | 43202  | 376  | 26.33 | 10 | 15.16 | up |
| A0A034VFB2 | 6-phosphogluconate dehydrogenase, decarboxylating     | 52780  | 481  | 63.20 | 27 | 15.02 | up |
| A0A034W6L5 | Importin-7                                            | 119886 | 1048 | 37.60 | 31 | 14.03 | up |
| A0A034VJ67 | Protein cup (Fragment)                                | 127850 | 1173 | 22.25 | 24 | 13.94 | up |
| A0A034V6V9 | Importin-4                                            | 120939 | 1087 | 42.23 | 40 | 13.56 | up |
| A0A034WBZ8 | Putative serine protease K12H4.7                      | 59035  | 517  | 39.65 | 19 | 13.40 | up |
| A0A034W0T2 | Inosine-5'-monophosphate dehydrogenase                | 57498  | 534  | 35.96 | 12 | 13.26 | up |
| A0A034WID2 | RIP-like protein                                      | 25269  | 220  | 13.64 | 3  | 13.24 | up |
| A0A034W6K6 | Tetraspanin                                           | 26383  | 236  | 22.46 | 5  | 13.22 | up |
| A0A034WGD6 | Protein zwilch                                        | 73614  | 646  | 18.27 | 10 | 13.16 | up |
| A0A034W1V3 | Diphthine synthase                                    | 31790  | 280  | 47.14 | 9  | 12.99 | up |
| A0A034VHX8 | DEP domain-containing protein 5 (Fragment)            | 54054  | 465  | 6.88  | 3  | 12.96 | up |
| A0A034W1D2 | UDP-glucuronosyltransferase 1-1 (Fragment)            | 74468  | 640  | 8.59  | 5  | 12.79 | up |
| A0A034UZF8 | Uncharacterized protein (Fragment)                    | 150148 | 1341 | 6.26  | 8  | 12.74 | up |
| A0A034WT22 | Uncharacterized protein                               | 32198  | 290  | 21.72 | 6  | 12.35 | up |
| A0A034VUT0 | Protein singed (Fragment)                             | 56975  | 509  | 31.43 | 13 | 12.32 | up |
| A0A034WCS4 | Dehydrogenase/reductase SDR family member 11          | 27759  | 251  | 57.77 | 8  | 12.22 | up |
| I1SWI8     | Heat shock protein 60                                 | 61054  | 573  | 77.66 | 47 | 12.15 | up |
| A0A034VC07 | Thioredoxin reductase 1, mitochondrial                | 53451  | 493  | 71.40 | 28 | 12.01 | up |
| A0A034VLP4 | Transforming growth factor-beta-induced protein ig-h3 | 89994  | 810  | 44.69 | 28 | 12.00 | up |
| A0A034WPW1 | Importin-13                                           | 111854 | 975  | 5.74  | 5  | 11.90 | up |
| A0A034V1Z6 | Valine--tRNA ligase                                   | 120041 | 1054 | 39.75 | 36 | 11.89 | up |
| A0A034WKN9 | C2 domain-containing protein 3 (Fragment)             | 75399  | 682  | 33.43 | 14 | 11.82 | up |
| A0A034W4L6 | Lipid storage droplets surface-binding protein 2      | 37989  | 353  | 61.47 | 20 | 11.82 | up |
| A0A034VXQ0 | Phosphate carrier protein, mitochondrial              | 38352  | 353  | 43.91 | 15 | 11.37 | up |
| A0A034WDZ9 | Importin-5                                            | 123792 | 1106 | 53.35 | 47 | 11.19 | up |



|            |                                                                    |        |      |       |    |       |    |
|------------|--------------------------------------------------------------------|--------|------|-------|----|-------|----|
| A0A034W397 | Dual specificity mitogen-activated protein kinase kinase dSOR1     | 44030  | 397  | 44.58 | 18 | 11.14 | up |
| A0A034V3F4 | Tripeptidyl-peptidase 2                                            | 149295 | 1353 | 47.97 | 54 | 11.08 | up |
| A0A034WNG6 | Alanine--tRNA ligase, cytoplasmic                                  | 108265 | 967  | 50.26 | 38 | 11.06 | up |
| A0A034V085 | Proteasome-associated protein ECM29-like protein                   | 212089 | 1889 | 26.95 | 41 | 11.06 | up |
| A0A034VMA5 | ATP-binding cassette sub-family F member 2                         | 69942  | 610  | 27.70 | 17 | 10.91 | up |
| A0A034VPR3 | Elongation factor Tu GTP-binding domain-containing protein 1       | 116814 | 1043 | 31.06 | 28 | 10.71 | up |
| A0A034VXE8 | Uncharacterized protein                                            | 27095  | 242  | 35.12 | 6  | 10.69 | up |
| A0A034WWE5 | Uncharacterized protein (Fragment)                                 | 11638  | 102  | 35.29 | 3  | 10.67 | up |
| A0A034VXK9 | Aspartate aminotransferase (Fragment)                              | 42034  | 376  | 76.86 | 26 | 10.59 | up |
| A0A034WID4 | Putative cation-transporting ATPase 13A1                           | 136813 | 1216 | 18.67 | 19 | 10.57 | up |
| A0A034VC08 | Xaa-Pro dipeptidase                                                | 53654  | 480  | 42.29 | 18 | 10.51 | up |
| A0A034VML9 | Importin-9                                                         | 114510 | 1018 | 33.10 | 25 | 10.37 | up |
| A0A034WW15 | 40S ribosomal protein S3                                           | 27365  | 244  | 80.33 | 26 | 10.31 | up |
| A0A034WCE7 | Insulin receptor                                                   | 109284 | 963  | 30.43 | 21 | 10.20 | up |
| A0A034VUA6 | 26S proteasome non-ATPase regulatory subunit 1                     | 112769 | 1017 | 52.51 | 45 | 10.15 | up |
| A0A034W2M7 | Elongation factor 1-gamma (Fragment)                               | 49900  | 438  | 58.68 | 31 | 10.04 | up |
| A0A034WJ30 | Uncharacterized protein                                            | 38270  | 326  | 23.01 | 6  | 10.00 | up |
| A0A034W486 | Protein transport protein Sec61 subunit alpha isoform 2 (Fragment) | 37285  | 340  | 20.29 | 7  | 9.94  | up |
| A0A034W9W8 | Uncharacterized protein                                            | 28452  | 247  | 22.67 | 4  | 9.94  | up |
| A0A034VI39 | Bleomycin hydrolase                                                | 52713  | 461  | 57.70 | 26 | 9.85  | up |
| A0A034WEU3 | Enoyl-CoA delta isomerase 2, mitochondrial                         | 28863  | 260  | 48.46 | 10 | 9.78  | up |
| A0A034W9D5 | Glutaminy-peptide cyclotransferase-like protein                    | 37294  | 330  | 15.45 | 5  | 9.60  | up |
| A0A034VED9 | UPF0586 protein CG11596                                            | 50004  | 435  | 13.10 | 6  | 9.59  | up |
| A0A034WD99 | Pyruvate kinase                                                    | 58030  | 535  | 81.50 | 42 | 9.54  | up |
| A0A034VA47 | Uncharacterized protein (Fragment)                                 | 96787  | 853  | 21.81 | 18 | 9.52  | up |
| A0A034WKN7 | Methyltransferase-like protein 13                                  | 76261  | 675  | 33.63 | 19 | 9.51  | up |
| A0A034WF02 | Uncharacterized protein                                            | 42149  | 373  | 16.35 | 5  | 9.48  | up |
| A0A034WB81 | T-complex protein 1 subunit gamma                                  | 59276  | 543  | 71.27 | 41 | 9.44  | up |
| A0A034WBX7 | Ribonucleoside-diphosphate reductase                               | 90971  | 804  | 46.27 | 34 | 9.34  | up |
| A0A034W0V2 | Cystathionine beta-synthase                                        | 56287  | 515  | 13.40 | 6  | 9.20  | up |
| A0A034V8K3 | RING finger protein 17 (Fragment)                                  | 76371  | 675  | 34.81 | 17 | 9.17  | up |
| A0A034VG52 | Adenosylhomocysteinase                                             | 56004  | 509  | 53.24 | 23 | 9.11  | up |
| A0A034V7V4 | Uncharacterized protein (Fragment)                                 | 123947 | 1092 | 18.50 | 16 | 9.10  | up |

|            |                                                                    |        |      |       |    |      |    |
|------------|--------------------------------------------------------------------|--------|------|-------|----|------|----|
| A0A034VR21 | Protein bicaudal C                                                 | 98705  | 899  | 26.25 | 15 | 9.06 | up |
| A0A034VZW3 | Transitional endoplasmic reticulum ATPase<br>TER94                 | 88721  | 799  | 65.08 | 52 | 8.87 | up |
| A0A034V392 | Receptor expression-enhancing protein                              | 34730  | 304  | 12.50 | 3  | 8.84 | up |
| A0A034WGZ4 | Elongation factor Ts, mitochondrial                                | 33818  | 305  | 40.66 | 9  | 8.81 | up |
| A0A034WMH5 | 26S proteasome non-ATPase regulatory<br>subunit 13                 | 43727  | 382  | 47.64 | 20 | 8.79 | up |
| A0A034WM52 | Cullin-associated NEDD8-dissociated protein<br>1                   | 139107 | 1236 | 39.56 | 41 | 8.77 | up |
| A0A034WM27 | Tubulin--tyrosine ligase-like protein 12                           | 74892  | 641  | 29.49 | 17 | 8.49 | up |
| A0A034V3E5 | Nuclear pore complex protein Nup107<br>(Fragment)                  | 103735 | 899  | 34.59 | 25 | 8.46 | up |
| A0A034WE93 | Glycine--tRNA ligase                                               | 76602  | 679  | 50.07 | 31 | 8.36 | up |
| A0A034VGT4 | Tetratricopeptide repeat protein 37                                | 140255 | 1234 | 7.05  | 6  | 8.26 | up |
| A0A034UZ41 | Sepiapterin reductase                                              | 29503  | 263  | 50.57 | 10 | 8.20 | up |
| A0A034W9N5 | 26S proteasome non-ATPase regulatory<br>subunit 8                  | 30629  | 265  | 70.57 | 19 | 8.19 | up |
| A0A034V3I0 | CAD protein (Fragment)                                             | 136404 | 1234 | 20.83 | 17 | 8.12 | up |
| A0A034WL96 | 60S ribosomal protein L13                                          | 25137  | 216  | 39.81 | 13 | 8.08 | up |
| A0A034VA13 | Eukaryotic initiation factor 4A                                    | 45755  | 403  | 67.00 | 28 | 8.02 | up |
| A0A034V3P5 | Uncharacterized protein (Fragment)                                 | 114127 | 1011 | 15.03 | 11 | 7.99 | up |
| A0A034V8K5 | Aminopeptidase N                                                   | 119690 | 1035 | 19.81 | 16 | 7.97 | up |
| A0A034V3F2 | 26S protease regulatory subunit 7                                  | 48544  | 433  | 62.82 | 30 | 7.91 | up |
| A0A034W163 | Xanthine dehydrogenase (Fragment)                                  | 143901 | 1298 | 19.95 | 21 | 7.88 | up |
| A0A034VV21 | Nuclear pore complex protein Nup205<br>(Fragment)                  | 124867 | 1088 | 22.79 | 20 | 7.84 | up |
| A0A034W3L0 | Ankyrin repeat and KH domain-containing<br>protein mask (Fragment) | 54726  | 507  | 29.98 | 11 | 7.83 | up |
| A0A034WWD8 | Exportin-1                                                         | 123439 | 1070 | 40.56 | 37 | 7.83 | up |
| A0A034W1C0 | Eukaryotic translation initiation factor 4<br>gamma 2              | 106157 | 942  | 27.81 | 19 | 7.82 | up |
| A0A034VKU6 | Myotubularin-related protein 3                                     | 139934 | 1279 | 17.98 | 18 | 7.79 | up |
| A0A034VIB7 | Protein phosphatase 1B                                             | 41338  | 370  | 40.54 | 13 | 7.73 | up |
| A0A034WIQ8 | Phosphoserine aminotransferase                                     | 40024  | 366  | 59.29 | 18 | 7.70 | up |
| A0A034WC12 | Cytosolic endo-beta-N-acetylglucosaminidase                        | 70022  | 604  | 30.30 | 15 | 7.67 | up |
| A0A034VI37 | Glutamyl aminopeptidase                                            | 118712 | 1045 | 34.64 | 31 | 7.53 | up |
| A0A034VV64 | Eukaryotic translation initiation factor 3<br>subunit A            | 132786 | 1126 | 34.46 | 37 | 7.47 | up |
| A0A034WM97 | Glutathione S-transferase 1                                        | 24717  | 222  | 59.46 | 14 | 7.46 | up |

|            |                                                      |        |      |       |    |      |    |
|------------|------------------------------------------------------|--------|------|-------|----|------|----|
| A0A034VYI4 | Tyrosine--tRNA ligase (Fragment)                     | 58023  | 523  | 65.01 | 29 | 7.46 | up |
| A0A034V173 | Putative N-acetyltransferase san                     | 21206  | 186  | 50.54 | 10 | 7.46 | up |
| A0A034WUY1 | Ubiquitin carboxyl-terminal hydrolase                | 25481  | 227  | 74.89 | 11 | 7.42 | up |
| A0A034V1A5 | Putative 6-phosphogluconolactonase                   | 26291  | 238  | 59.66 | 12 | 7.27 | up |
| A0A034WEC5 | Uncharacterized protein                              | 14367  | 129  | 30.23 | 3  | 7.25 | up |
| A0A034VH61 | Putative aminopeptidase W07G4.4                      | 54904  | 505  | 59.80 | 27 | 7.23 | up |
| A0A034VUQ7 | Glucose-6-phosphate 1-dehydrogenase                  | 60835  | 527  | 52.56 | 22 | 7.12 | up |
| A0A034VU00 | Sorting nexin-16                                     | 49595  | 447  | 11.63 | 4  | 7.01 | up |
| A0A034V1D4 | CAD protein (Fragment)                               | 111533 | 999  | 28.43 | 25 | 6.88 | up |
| A0A034VK02 | Dihydrolipoyl dehydrogenase                          | 53044  | 504  | 58.33 | 26 | 6.88 | up |
| A0A034WUZ1 | Protein canopy-like protein 2                        | 21486  | 191  | 39.27 | 6  | 6.77 | up |
| A0A034VAA7 | Centrosomin (Fragment)                               | 112702 | 992  | 10.58 | 8  | 6.77 | up |
| A0A034VFZ9 | Kinetochore-associated protein 1 (Fragment)          | 89215  | 770  | 26.36 | 17 | 6.74 | up |
| A0A034VMD8 | Cytoskeleton-associated protein 5 (Fragment)         | 135423 | 1227 | 26.57 | 26 | 6.72 | up |
| A0A034VEP1 | Exportin-5                                           | 43240  | 388  | 18.56 | 5  | 6.69 | up |
| A0A034VQT5 | Serine/threonine-protein kinase polo                 | 67246  | 576  | 29.69 | 13 | 6.60 | up |
| A0A034WJW9 | 26S proteasome non-ATPase regulatory subunit 5       | 56937  | 499  | 19.24 | 9  | 6.58 | up |
| A0A034V1T1 | Protein purity of essence (Fragment)                 | 110879 | 976  | 15.16 | 12 | 6.58 | up |
| A0A034W647 | Peptidyl-prolyl cis-trans isomerase D                | 51319  | 442  | 34.62 | 15 | 6.55 | up |
| A0A034WU84 | Proteasome subunit alpha type                        | 28026  | 253  | 60.08 | 14 | 6.49 | up |
| A0A034WDU4 | Endoplasmin                                          | 91351  | 797  | 56.21 | 46 | 6.47 | up |
| A0A034VLF2 | Coatomer subunit beta                                | 106993 | 953  | 33.47 | 26 | 6.38 | up |
| A0A034W3A2 | Serine--tRNA ligase, cytoplasmic                     | 56415  | 497  | 49.09 | 17 | 6.37 | up |
| A0A034V8L4 | Aldehyde dehydrogenase, mitochondrial (Fragment)     | 44957  | 413  | 72.15 | 21 | 6.30 | up |
| A0A034WPA4 | 28S ribosomal protein S35, mitochondrial             | 38291  | 332  | 31.02 | 8  | 6.28 | up |
| A0A034VJH4 | N-alpha-acetyltransferase 16, NatA auxiliary subunit | 101634 | 878  | 33.94 | 28 | 6.26 | up |
| G9F9Y5     | Chitinase                                            | 54275  | 483  | 24.43 | 8  | 6.26 | up |
| A0A034VFI5 | Centromere/kinetochore protein zw10                  | 81461  | 708  | 17.94 | 11 | 6.22 | up |
| A0A034VZH7 | 26S proteasome non-ATPase regulatory subunit 2       | 101079 | 911  | 48.74 | 35 | 6.17 | up |
| A0A034WPS5 | COP9 signalosome complex subunit 1b                  | 56677  | 511  | 25.24 | 10 | 6.12 | up |
| A0A034WF61 | Serine/threonine-protein phosphatase                 | 34736  | 303  | 36.96 | 9  | 6.10 | up |
| A0A034WFC0 | ATP synthase subunit gamma                           | 33092  | 297  | 38.72 | 12 | 6.08 | up |
| A0A034VEZ1 | Glutamate synthase (NADH), amyloplastic              | 230930 | 2093 | 43.91 | 77 | 6.03 | up |
| A0A034W6I8 | Exportin-2                                           | 109799 | 972  | 34.88 | 33 | 5.94 | up |
| A0A034VUM9 | Protein amalgam                                      | 36389  | 329  | 54.71 | 15 | 5.93 | up |

|            |                                                                     |        |      |       |    |      |    |
|------------|---------------------------------------------------------------------|--------|------|-------|----|------|----|
| A0A034VGJ0 | Putative multidrug resistance-associated protein lethal(2)03659     | 57681  | 513  | 21.64 | 9  | 5.91 | up |
| A0A034WRK8 | Farnesyl pyrophosphate synthase                                     | 46845  | 408  | 17.16 | 6  | 5.90 | up |
| A0A034W4A7 | Glutathione S-transferase 1-1                                       | 23716  | 207  | 49.76 | 11 | 5.86 | up |
| A0A034WJJ8 | Defective in cullin neddylation protein                             | 28327  | 243  | 24.69 | 5  | 5.86 | up |
| A0A034VM32 | CCR4-NOT transcription complex subunit 1 (Fragment)                 | 123312 | 1091 | 20.99 | 20 | 5.82 | up |
| A0A034VU18 | Protein ref(2)P                                                     | 76359  | 702  | 27.78 | 12 | 5.78 | up |
| A0A034VWI5 | Leucine-rich PPR motif-containing protein, mitochondrial (Fragment) | 159347 | 1418 | 43.86 | 50 | 5.75 | up |
| A0A034VGJ1 | Clustered mitochondria protein homolog                              | 153417 | 1362 | 30.54 | 35 | 5.70 | up |
| A0A034V2H3 | Protein purity of essence (Fragment)                                | 104460 | 945  | 15.24 | 10 | 5.65 | up |
| A0A034WDM9 | 26S protease regulatory subunit 6A                                  | 47779  | 428  | 63.55 | 25 | 5.63 | up |
| A0A034WFM3 | 60S ribosomal protein L3                                            | 46663  | 413  | 50.36 | 26 | 5.58 | up |
| A0A034WIJ0 | COP9 signalosome complex subunit 4                                  | 46518  | 407  | 61.67 | 21 | 5.58 | up |
| A0A034VEP3 | 4-aminobutyrate aminotransferase, mitochondrial                     | 54817  | 491  | 48.88 | 18 | 5.56 | up |
| A0A034VBA8 | Isoleucine--tRNA ligase, cytoplasmic (Fragment)                     | 53686  | 468  | 38.46 | 16 | 5.54 | up |
| A0A034V4X1 | Proton-coupled amino acid transporter 4                             | 48307  | 443  | 11.74 | 4  | 5.54 | up |
| A0A034WU78 | Fumarate hydratase, mitochondrial                                   | 54067  | 500  | 48.00 | 18 | 5.49 | up |
| A0A034V813 | Acetyl-CoA carboxylase                                              | 270348 | 2391 | 34.84 | 58 | 5.48 | up |
| A0A034VUM4 | Protein extra bases (Fragment)                                      | 48866  | 420  | 46.19 | 23 | 5.47 | up |
| A0A034WR67 | COP9 signalosome complex subunit 5                                  | 37494  | 333  | 41.14 | 12 | 5.43 | up |
| A0A034V540 | Uncharacterized protein                                             | 28794  | 253  | 43.08 | 9  | 5.42 | up |
| A0A034VKN3 | Leucine--tRNA ligase, cytoplasmic                                   | 135606 | 1182 | 45.18 | 44 | 5.40 | up |
| A0A034VRR7 | E3 ubiquitin-protein ligase listerin                                | 193519 | 1664 | 9.74  | 14 | 5.39 | up |
| A0A034VDY8 | Bifunctional glutamate/proline--tRNA ligase                         | 185312 | 1636 | 48.66 | 65 | 5.35 | up |
| A0A034VAK1 | Heat shock protein 75 kDa, mitochondrial                            | 80438  | 710  | 42.25 | 25 | 5.33 | up |
| A0A034VER4 | Ubiquitin-conjugating enzyme E2 O                                   | 172146 | 1542 | 11.22 | 13 | 5.32 | up |
| A0A034VGD9 | DNA primase (Fragment)                                              | 45606  | 397  | 11.84 | 5  | 5.30 | up |
| A0A034W4L2 | Enhancer of mRNA-decapping protein 3                                | 64715  | 585  | 19.66 | 8  | 5.26 | up |
| A0A034V786 | AP-3 complex subunit delta                                          | 116643 | 1033 | 8.03  | 8  | 5.26 | up |
| A0A034W4W3 | Transportin-1                                                       | 100645 | 886  | 27.20 | 18 | 5.22 | up |
| A0A034WJ52 | Eukaryotic translation initiation factor 4 gamma 1                  | 195326 | 1766 | 36.98 | 46 | 5.18 | up |
| A0A034WUF9 | Uncharacterized protein                                             | 37742  | 341  | 5.86  | 2  | 5.17 | up |
| A0A034VKX9 | Alkylldihydroxyacetonephosphate synthase (Fragment)                 | 76813  | 689  | 22.35 | 11 | 5.15 | up |

|            |                                                                      |        |      |       |    |      |    |
|------------|----------------------------------------------------------------------|--------|------|-------|----|------|----|
| A0A034UZF5 | Protein purity of essence (Fragment)                                 | 237724 | 2178 | 13.77 | 25 | 5.13 | up |
| A0A034WB53 | Cullin-5 (Fragment)                                                  | 97906  | 850  | 16.24 | 12 | 5.13 | up |
| A0A034V9L3 | Poly(A) RNA polymerase gld-2-like protein A                          | 62204  | 550  | 9.09  | 5  | 5.09 | up |
| A0A034WIL4 | NADH dehydrogenase (Ubiquinone) iron-sulfur protein 2, mitochondrial | 53289  | 473  | 43.97 | 18 | 5.08 | up |
| A0A034VPQ5 | Actin-related protein 2/3 complex subunit 4                          | 19578  | 168  | 22.62 | 4  | 5.02 | up |
| A0A034W6A3 | Microtubule-associated protein RP/EB family member 1                 | 28965  | 253  | 22.13 | 6  | 5.02 | up |
| A0A034V4D6 | DnaJ-like protein subfamily C member 13 (Fragment)                   | 220756 | 1936 | 21.02 | 31 | 5.00 | up |
| A0A034W450 | Uncharacterized protein                                              | 29321  | 264  | 39.77 | 11 | 5.00 | up |
| A0A034WDC3 | DNA replication inhibitor plutonium (Fragment)                       | 20902  | 186  | 24.19 | 3  | 4.99 | up |
| A0A034W865 | Gamma-tubulin complex component 3-like protein                       | 107662 | 951  | 19.77 | 15 | 4.98 | up |
| A0A034VNQ2 | Nuclear pore complex protein Nup85                                   | 77843  | 677  | 36.63 | 19 | 4.96 | up |
| A0A034WNA4 | GMP synthase (Glutamine-hydrolyzing)                                 | 76303  | 683  | 53.44 | 30 | 4.92 | up |
| A0A034WFJ7 | Putative elongator complex protein 1 (Fragment)                      | 118063 | 1025 | 26.63 | 23 | 4.91 | up |
| A0A034VL30 | Nuclear pore complex protein Nup160-like protein (Fragment)          | 119129 | 1044 | 18.68 | 13 | 4.78 | up |
| A0A034WRP8 | Alpha-tocopherol transfer-like protein                               | 36234  | 311  | 13.50 | 4  | 4.74 | up |
| A0A034W6Z5 | 26S proteasome non-ATPase regulatory subunit 11                      | 47258  | 421  | 57.96 | 27 | 4.73 | up |
| A0A034WDL1 | NADH-ubiquinone oxidoreductase 75 kDa subunit, mitochondrial         | 80086  | 736  | 46.47 | 29 | 4.72 | up |
| A0A034W2K6 | Major royal jelly protein 1                                          | 47088  | 425  | 40.24 | 14 | 4.68 | up |
| A0A034WHL8 | Venom carboxylesterase-6                                             | 62660  | 549  | 25.14 | 12 | 4.68 | up |
| A0A034UZI2 | Aladin                                                               | 52368  | 467  | 37.47 | 14 | 4.62 | up |
| A0A034WUW3 | UPF0160 protein MYG1, mitochondrial (Fragment)                       | 44465  | 385  | 37.14 | 12 | 4.61 | up |
| A0A034VCH0 | 1-acylglycerophosphocholine O-acyltransferase 1                      | 61466  | 538  | 26.21 | 10 | 4.58 | up |
| A0A034VDI3 | Vacuolar protein sorting-associated protein 35                       | 91897  | 808  | 24.50 | 17 | 4.57 | up |
| A0A034W3T2 | Serine/threonine-protein phosphatase 5                               | 61618  | 544  | 40.26 | 19 | 4.56 | up |
| A0A034V555 | Ubiquitin carboxyl-terminal hydrolase (Fragment)                     | 138806 | 1221 | 14.58 | 15 | 4.48 | up |
| A0A034VW60 | Apoptosis-inducing factor 3                                          | 61371  | 557  | 26.93 | 13 | 4.46 | up |
| A0A034VTP3 | TBC1 domain family member 5                                          | 80221  | 695  | 11.65 | 7  | 4.45 | up |

|            |                                                              |        |      |       |    |      |    |
|------------|--------------------------------------------------------------|--------|------|-------|----|------|----|
| A0A034VRQ0 | Translational activator GCN1 (Fragment)                      | 161957 | 1471 | 34.81 | 39 | 4.44 | up |
| A0A034WCD3 | NEDD8-activating enzyme E1 regulatory subunit                | 58530  | 522  | 29.12 | 13 | 4.43 | up |
| A0A034VX54 | Aspartate aminotransferase, cytoplasmic                      | 45679  | 407  | 60.69 | 20 | 4.41 | up |
| A0A034W9F2 | Histone-lysine N-methyltransferase setd3                     | 61477  | 534  | 36.14 | 17 | 4.37 | up |
| A0A034V9G7 | Eukaryotic translation initiation factor 5B                  | 134978 | 1215 | 24.86 | 20 | 4.36 | up |
| A0A034VMW4 | Uridine 5'-monophosphate synthase                            | 53209  | 487  | 49.08 | 20 | 4.35 | up |
| A0A034WMG0 | Ubiquitin carboxyl-terminal hydrolase                        | 128892 | 1110 | 31.08 | 29 | 4.28 | up |
| A0A034WJS4 | Protein I(2)37Cc                                             | 30367  | 276  | 85.14 | 21 | 4.24 | up |
| A0A034W9B6 | T-complex protein 1 subunit zeta                             | 58468  | 531  | 64.22 | 28 | 4.09 | up |
| A0A034VAG4 | Tudor domain-containing protein 12                           | 96482  | 848  | 10.73 | 8  | 4.01 | up |
| A0A034W1H3 | Nuclear pore complex protein Nup93                           | 92985  | 809  | 38.32 | 27 | 4.00 | up |
| A0A034VN48 | Putative fatty acyl-CoA reductase CG5065                     | 64021  | 566  | 12.19 | 7  | 3.98 | up |
| A0A034V5U4 | 6-phosphofructokinase                                        | 86075  | 781  | 34.83 | 19 | 3.96 | up |
| A0A034VBM4 | Trifunctional purine biosynthetic protein adenosine-3        | 148058 | 1368 | 35.75 | 39 | 3.96 | up |
| A0A034VPD5 | Villin-like protein quail                                    | 103012 | 895  | 18.21 | 13 | 3.93 | up |
| A0A034WNJ6 | Heat shock 70 kDa protein cognate 5                          | 73628  | 679  | 55.23 | 34 | 3.91 | up |
| A0A034VRJ4 | Neutral alpha-glucosidase AB (Fragment)                      | 51947  | 449  | 45.88 | 18 | 3.91 | up |
| A0A034VK16 | Cytoskeleton-associated protein 5 (Fragment)                 | 79847  | 734  | 32.70 | 20 | 3.90 | up |
| A0A034VK83 | Isochorismatase domain-containing protein 1                  | 23205  | 207  | 43.48 | 9  | 3.88 | up |
| A0A034VV03 | Protein phosphatase methylesterase 1                         | 46122  | 416  | 16.83 | 6  | 3.85 | up |
| A0A034WCY3 | Dedicator of cytokinesis protein 3 (Fragment)                | 204946 | 1790 | 5.81  | 9  | 3.85 | up |
| A0A034W7H6 | Cyclin-dependent kinase 5-like protein                       | 33341  | 293  | 14.68 | 4  | 3.82 | up |
| A0A034V6X7 | Multidrug resistance-associated protein 1                    | 174106 | 1550 | 27.42 | 33 | 3.76 | up |
| A0A034W5B8 | Uncharacterized protein (Fragment)                           | 42772  | 431  | 20.65 | 5  | 3.74 | up |
| A0A034VS83 | Hypoxia up-regulated protein 1                               | 107546 | 957  | 42.11 | 30 | 3.67 | up |
| A0A034WTT2 | Proteasome subunit beta type-1                               | 25619  | 231  | 67.10 | 16 | 3.65 | up |
| A0A034V6T2 | Insulin-degrading enzyme                                     | 120515 | 1048 | 24.43 | 24 | 3.65 | up |
| A0A034V2C6 | Serine/threonine-protein kinase Warts (Fragment)             | 68956  | 610  | 16.23 | 7  | 3.62 | up |
| A0A034VQ24 | 60S ribosomal export protein NMD3                            | 59124  | 517  | 30.95 | 12 | 3.61 | up |
| A0A034VF36 | Ubiquitin-conjugating enzyme E2 Q2                           | 43953  | 389  | 9.77  | 3  | 3.57 | up |
| A0A034VG90 | Nuclear pore complex protein Nup133                          | 135450 | 1193 | 20.12 | 19 | 3.54 | up |
| A0A034WVA3 | Elongation factor Tu                                         | 53920  | 490  | 49.39 | 19 | 3.53 | up |
| A0A034W9M9 | Cytosolic 10-formyltetrahydrofolate dehydrogenase (Fragment) | 25559  | 231  | 47.19 | 9  | 3.49 | up |
| A0A034VF44 | WD repeat-containing protein mio (Fragment)                  | 69582  | 613  | 15.33 | 8  | 3.47 | up |
| A0A034WIU7 | Tetratricopeptide repeat protein 27                          | 91135  | 792  | 16.67 | 11 | 3.46 | up |

|            |                                                                     |        |      |       |    |      |    |
|------------|---------------------------------------------------------------------|--------|------|-------|----|------|----|
| A0A034VLV8 | Glutamyl-tRNA(Gln) amidotransferase subunit A, mitochondrial        | 45422  | 414  | 17.87 | 6  | 3.46 | up |
| A0A034VKB0 | Transforming acidic coiled-coil-containing protein 1                | 158551 | 1441 | 13.60 | 15 | 3.43 | up |
| A0A034VH80 | Calcium-binding mitochondrial carrier protein Aralar1               | 74442  | 671  | 34.13 | 22 | 3.41 | up |
| A0A034W952 | Dymeclin                                                            | 79918  | 702  | 14.81 | 8  | 3.41 | up |
| A0A034W7N0 | Protein NASP-like protein                                           | 46397  | 427  | 41.22 | 15 | 3.40 | up |
| A0A034WQ10 | Cullin-4A                                                           | 97155  | 841  | 27.59 | 20 | 3.35 | up |
| A0A034VFE4 | DDB1-and CUL4-associated factor-like 1 (Fragment)                   | 106321 | 962  | 12.89 | 9  | 3.35 | up |
| A0A034WRS4 | 60S acidic ribosomal protein P2                                     | 11743  | 113  | 74.34 | 9  | 3.31 | up |
| A0A034VAS4 | Acetyltransferase component of pyruvate dehydrogenase complex       | 53683  | 503  | 39.36 | 14 | 3.31 | up |
| A0A034VN77 | Rab proteins geranylgeranyltransferase component A                  | 63386  | 571  | 24.87 | 10 | 3.30 | up |
| A0A034VLI5 | Protein-tyrosine-phosphatase                                        | 67935  | 604  | 22.85 | 10 | 3.28 | up |
| A0A034W439 | Ubiquitin carboxyl-terminal hydrolase                               | 90946  | 809  | 43.39 | 26 | 3.26 | up |
| A0A034V250 | Glycogen debranching enzyme                                         | 210785 | 1878 | 18.69 | 32 | 3.22 | up |
| A0A034W273 | Aspartate--tRNA ligase, cytoplasmic                                 | 60020  | 539  | 49.91 | 25 | 3.16 | up |
| A0A034WJX0 | Protein croquemort                                                  | 55866  | 488  | 21.52 | 8  | 3.14 | up |
| A0A034VQ97 | CD109 antigen                                                       | 159290 | 1430 | 30.49 | 39 | 3.11 | up |
| A0A034WAN7 | Signal recognition particle 54 kDa protein                          | 55927  | 508  | 36.22 | 12 | 3.09 | up |
| A0A034VI89 | Conserved oligomeric Golgi complex subunit 6                        | 71503  | 628  | 20.06 | 9  | 3.07 | up |
| A0A034WJH2 | Protein dpy-30-like protein                                         | 10966  | 99   | 47.47 | 4  | 3.00 | up |
| A0A034WBK6 | Nuclear pore complex protein Nup155                                 | 158067 | 1404 | 20.66 | 21 | 2.97 | up |
| A0A034VXN0 | Short/branched chain specific acyl-CoA dehydrogenase, mitochondrial | 45479  | 413  | 41.16 | 12 | 2.94 | up |
| A0A034VKF8 | Cysteine and histidine-rich protein 1-like protein                  | 49166  | 447  | 30.20 | 10 | 2.88 | up |
| A0A034VDF3 | Squamous cell carcinoma antigen recognized by T-cells 3 (Fragment)  | 61804  | 532  | 31.20 | 17 | 2.88 | up |
| A0A034WBQ5 | Alpha-1,4 glucan phosphorylase                                      | 97349  | 845  | 61.07 | 50 | 2.84 | up |
| V9P6U5     | Cytochrome P450 monooxygenase 6g2                                   | 62018  | 535  | 20.19 | 10 | 2.84 | up |
| A0A034VJU9 | 85/88 kDa calcium-independent phospholipase A2                      | 96050  | 872  | 23.28 | 19 | 2.80 | up |
| A0A034WGV9 | Tryptophan--tRNA ligase, cytoplasmic                                | 48047  | 428  | 29.44 | 11 | 2.79 | up |
| A0A034WMX6 | Putative prefoldin subunit 5                                        | 18487  | 160  | 76.88 | 10 | 2.74 | up |

|            |                                                                          |        |      |       |    |      |      |
|------------|--------------------------------------------------------------------------|--------|------|-------|----|------|------|
| A0A034W4T9 | Ubiquitin carboxyl-terminal hydrolase                                    | 110903 | 1010 | 16.53 | 11 | 2.68 | up   |
| A0A034WLW8 | Uncharacterized protein MJ1221                                           | 81379  | 736  | 6.39  | 4  | 2.68 | up   |
| A0A034VTV6 | Glutaredoxin-related protein 5, mitochondrial                            | 18955  | 169  | 29.59 | 4  | 2.67 | up   |
| A0A034VA05 | Molybdenum cofactor synthesis protein cinnamon                           | 66329  | 610  | 24.59 | 10 | 2.63 | up   |
| A0A034WIS7 | NADH dehydrogenase (Ubiquinone) flavoprotein 1, mitochondrial (Fragment) | 52627  | 480  | 44.37 | 17 | 2.60 | up   |
| A0A034W9G1 | Dynamin-like 120 kDa protein, mitochondrial                              | 107255 | 928  | 30.50 | 27 | 2.52 | up   |
| A0A034V7P1 | DNA polymerase                                                           | 125024 | 1098 | 19.95 | 19 | 2.51 | up   |
| A0A034VCX6 | Ubiquitin carboxyl-terminal hydrolase (Fragment)                         | 146448 | 1315 | 12.09 | 12 | 2.49 | up   |
| A0A034WG96 | Putative elongator complex protein 2                                     | 93814  | 830  | 17.35 | 11 | 2.44 | up   |
| A0A034WYF0 | Peroxiredoxin-2                                                          | 26204  | 233  | 51.93 | 11 | 2.43 | up   |
| A0A034W5E6 | UDP-glucose:glycoprotein glucosyltransferase                             | 176236 | 1555 | 38.01 | 48 | 2.41 | up   |
| A0A034WVN6 | Protein SCO1-like protein, mitochondrial                                 | 29967  | 265  | 31.70 | 10 | 2.36 | up   |
| A0A034VKN7 | Prolyl endopeptidase                                                     | 84845  | 738  | 34.55 | 23 | 2.36 | up   |
| A0A034WAP1 | Beta-ureidopropionase                                                    | 43439  | 385  | 41.30 | 11 | 1.98 | up   |
| A0A034VHA7 | Cullin-3                                                                 | 90145  | 776  | 20.88 | 13 | 1.87 | up   |
| A0A034WAD0 | Uncharacterized protein                                                  | 14800  | 150  | 80.00 | 8  | 0.58 | down |
| A0A034VSB5 | Fascin-1                                                                 | 61398  | 542  | 35.42 | 17 | 0.56 | down |
| A0A034WUJ7 | Protein disulfide-isomerase A6 (Fragment)                                | 27335  | 262  | 32.06 | 5  | 0.56 | down |
| A0A034VPM4 | Vinculin                                                                 | 106095 | 960  | 50.63 | 38 | 0.54 | down |
| A0A034VWR5 | Nucleosome-remodeling factor subunit NURF301                             | 247424 | 2199 | 7.46  | 14 | 0.48 | down |
| A0A034VDN6 | Sorting nexin                                                            | 63684  | 561  | 40.11 | 19 | 0.45 | down |
| A0A034WBM1 | Acetyl-CoA acetyltransferase, cytosolic                                  | 41553  | 394  | 41.62 | 11 | 0.45 | down |
| A0A034V5R2 | Talin-1 (Fragment)                                                       | 211049 | 1928 | 48.86 | 69 | 0.45 | down |
| A0A034VM61 | Clavesin-2                                                               | 36462  | 320  | 33.44 | 9  | 0.45 | down |
| A0A034WHJ3 | Uncharacterized protein                                                  | 276170 | 2345 | 24.18 | 52 | 0.45 | down |
| A0A034W7F8 | Nuclear valosin-containing protein-like protein                          | 114062 | 1043 | 37.20 | 29 | 0.42 | down |
| A0A034VBD0 | Putative ATP-dependent RNA helicase DDX5                                 | 79548  | 732  | 30.60 | 18 | 0.42 | down |
| A0A034W1X2 | AlasERP1                                                                 | 44489  | 398  | 27.39 | 10 | 0.42 | down |
| A0A034VRI7 | Alpha-actinin, sarcomeric                                                | 103820 | 895  | 62.35 | 53 | 0.42 | down |
| A0A034VUR2 | Protein disulfide-isomerase A5                                           | 195906 | 1693 | 4.13  | 6  | 0.42 | down |
| A0A034WHH1 | Cytochrome b5                                                            | 13023  | 115  | 54.78 | 5  | 0.41 | down |
| A0A034VUP0 | Chitinase-like protein Idgf1 (Fragment)                                  | 53054  | 471  | 15.92 | 6  | 0.41 | down |
| A0A034W3J9 | Calnexin                                                                 | 69222  | 616  | 23.21 | 12 | 0.40 | down |
| A0A034W374 | Metal transporter CNNM2                                                  | 105061 | 947  | 19.54 | 14 | 0.40 | down |



|            |                                                                                        |        |      |       |    |      |      |
|------------|----------------------------------------------------------------------------------------|--------|------|-------|----|------|------|
| A0A034VS34 | Uncharacterized protein                                                                | 90376  | 818  | 4.28  | 3  | 0.39 | down |
| A0A034VUW1 | Uncharacterized protein (Fragment)                                                     | 106552 | 1022 | 8.71  | 7  | 0.39 | down |
| A0A034W9G7 | REST corepressor                                                                       | 50835  | 458  | 16.38 | 7  | 0.38 | down |
| A0A034VHT6 | Malate dehydrogenase (Fragment)                                                        | 43820  | 406  | 16.75 | 5  | 0.38 | down |
| A0A034WA29 | Aspartate--tRNA ligase, mitochondrial                                                  | 120485 | 1077 | 30.64 | 29 | 0.37 | down |
| A0A034W0B4 | Chitinase-like protein CG5210 (Fragment)                                               | 31320  | 279  | 51.25 | 14 | 0.37 | down |
| A0A034V322 | CD109 antigen                                                                          | 164963 | 1472 | 4.82  | 6  | 0.36 | down |
| A0A034WSX7 | KH domain-containing, RNA-binding, signal transduction-associated protein 2 (Fragment) | 37196  | 322  | 31.06 | 11 | 0.36 | down |
| A0A034WSM6 | Guanine nucleotide-binding protein G(S) subunit alpha                                  | 44569  | 382  | 32.20 | 10 | 0.36 | down |
| A0A034WPS6 | Inositol-3-phosphate synthase                                                          | 62553  | 568  | 42.96 | 18 | 0.36 | down |
| A0A034VP83 | Poly(U)-specific endoribonuclease-like protein                                         | 71754  | 675  | 24.74 | 13 | 0.35 | down |
| A0A034W3Z3 | Chromodomain Y-like protein                                                            | 114982 | 1051 | 11.04 | 10 | 0.35 | down |
| A0A034V2F7 | Titin (Fragment)                                                                       | 193385 | 1716 | 18.30 | 21 | 0.35 | down |
| A0A034V3H3 | Nesprin-1 (Fragment)                                                                   | 521689 | 4618 | 14.88 | 56 | 0.35 | down |
| A0A034WQQ0 | Calcyphosin-like protein                                                               | 24650  | 219  | 27.40 | 6  | 0.35 | down |
| A0A034WGX8 | Uncharacterized protein                                                                | 36223  | 320  | 20.62 | 6  | 0.35 | down |
| A0A034VMT8 | Gelsolin                                                                               | 84265  | 745  | 28.72 | 18 | 0.35 | down |
| A0A034VYI5 | Non-specific protein-tyrosine kinase                                                   | 58701  | 510  | 27.25 | 12 | 0.34 | down |
| A0A034V3I9 | Titin (Fragment)                                                                       | 230612 | 2040 | 24.71 | 38 | 0.34 | down |
| A0A034VP84 | Alpha-aminoadipic semialdehyde synthase, mitochondrial                                 | 105417 | 950  | 6.63  | 5  | 0.34 | down |
| A0A034WJE4 | Transcription elongation factor SPT5                                                   | 120771 | 1090 | 16.24 | 13 | 0.33 | down |
| A0A034VDX0 | L-2-hydroxyglutarate dehydrogenase, mitochondrial                                      | 50614  | 455  | 31.21 | 10 | 0.33 | down |
| A0A034W3K4 | Myosin-IB                                                                              | 117898 | 1025 | 10.15 | 10 | 0.32 | down |
| A0A034WJ92 | Protein piwi (Fragment)                                                                | 78854  | 688  | 51.45 | 37 | 0.32 | down |
| A0A034W5F4 | Uncharacterized protein                                                                | 28374  | 246  | 26.02 | 7  | 0.32 | down |
| A0A034VPR7 | Putative peptidyl-prolyl cis-trans isomerase dodo                                      | 17917  | 160  | 57.50 | 11 | 0.32 | down |
| A0A034VW38 | SUN domain-containing protein 1 (Fragment)                                             | 67523  | 594  | 21.55 | 13 | 0.31 | down |
| A0A034WKG9 | Ecdysteroid UDP-glucosyltransferase                                                    | 62370  | 549  | 24.77 | 10 | 0.31 | down |
| A0A034VK06 | Dystonin (Fragment)                                                                    | 566833 | 4968 | 12.32 | 52 | 0.31 | down |
| A0A034W4V5 | DE-cadherin                                                                            | 178717 | 1580 | 14.75 | 22 | 0.31 | down |
| A0A034V946 | Src substrate cortactin (Fragment)                                                     | 67412  | 601  | 16.97 | 9  | 0.30 | down |
| A0A034W0P6 | Serine/arginine-rich splicing factor 7                                                 | 29213  | 261  | 17.62 | 4  | 0.30 | down |
| A0A034WN98 | 17-beta-hydroxysteroid dehydrogenase 13                                                | 36367  | 326  | 25.15 | 7  | 0.30 | down |
| A0A034VZK0 | Muscle M-line assembly protein unc-89                                                  | 372226 | 3274 | 12.43 | 33 | 0.30 | down |

|            |                                                                  |        |      |       |     |      |      |
|------------|------------------------------------------------------------------|--------|------|-------|-----|------|------|
| A0A034VWG7 | 2-amino-3-ketobutyrate coenzyme A ligase, mitochondrial          | 47607  | 435  | 42.53 | 15  | 0.29 | down |
| A0A034W8P6 | Protein E(Sev)2B                                                 | 24462  | 211  | 43.60 | 9   | 0.29 | down |
| A0A034VQJ6 | Uncharacterized protein                                          | 66971  | 622  | 15.76 | 6   | 0.29 | down |
| A0A034WHD8 | Structural maintenance of chromosomes protein                    | 159829 | 1389 | 7.49  | 10  | 0.29 | down |
| A0A034WT25 | Uncharacterized protein                                          | 31077  | 274  | 43.80 | 8   | 0.29 | down |
| A0A034VAC6 | Protein elav                                                     | 47180  | 446  | 35.65 | 12  | 0.29 | down |
| A0A034V2K7 | Spectrin beta chain, non-erythrocytic 5                          | 483273 | 4200 | 26.48 | 94  | 0.29 | down |
| A0A034VQY4 | Protein bric-a-brac 2                                            | 101626 | 929  | 17.01 | 11  | 0.28 | down |
| A0A034WBA7 | Putative G-protein coupled receptor 158                          | 94535  | 809  | 29.05 | 20  | 0.28 | down |
| A0A034W1D4 | Hepatoma-derived growth factor                                   | 61550  | 545  | 30.09 | 15  | 0.28 | down |
| A0A034W317 | Uncharacterized protein                                          | 84817  | 798  | 20.93 | 14  | 0.27 | down |
| A0A034VVP8 | Serpin B9                                                        | 56716  | 504  | 29.76 | 14  | 0.27 | down |
| M1F3Z9     | Glutathione S-transferase omega-1                                | 29161  | 255  | 46.67 | 11  | 0.26 | down |
| A0A034V6M3 | 60S ribosomal protein L23a                                       | 28521  | 266  | 26.32 | 10  | 0.26 | down |
| A0A034WRQ2 | Alpha-parvin                                                     | 42015  | 366  | 33.06 | 10  | 0.26 | down |
| A0A034VDE1 | Protein-tyrosine-phosphatase                                     | 172176 | 1506 | 3.78  | 5   | 0.26 | down |
| A0A034VQG5 | Nucleoprotein TPR                                                | 271019 | 2410 | 26.22 | 53  | 0.26 | down |
| A0A034WF58 | Glutathione peroxidase                                           | 30583  | 278  | 48.92 | 13  | 0.26 | down |
| A0A034V9K3 | Ankyrin repeat domain-containing protein 39                      | 20553  | 181  | 43.65 | 6   | 0.25 | down |
| A0A034V5V1 | ZNF domain containing Pogo transposable element                  | 147005 | 1326 | 16.14 | 18  | 0.25 | down |
| A0A034VL96 | Kin of IRRE-like protein 2 (Fragment)                            | 50688  | 454  | 10.79 | 5   | 0.25 | down |
| A0A034WSZ7 | Heterochromatin protein 1                                        | 23688  | 212  | 23.11 | 5   | 0.24 | down |
| A0A034W3W4 | Calponin                                                         | 19151  | 169  | 71.01 | 13  | 0.24 | down |
| A0A034V7N7 | Protein lethal(2) giant larvae                                   | 127930 | 1176 | 24.23 | 21  | 0.24 | down |
| A0A034WHN3 | Putative helicase MOV-10                                         | 94691  | 826  | 40.68 | 32  | 0.24 | down |
| A0A034V457 | Prolow-density lipoprotein receptor-related protein 1 (Fragment) | 515158 | 4603 | 3.13  | 13  | 0.24 | down |
| A0A034VZ39 | Peroxidasin                                                      | 136185 | 1202 | 18.89 | 19  | 0.24 | down |
| A0A034VTK4 | DNA topoisomerase 2                                              | 167839 | 1481 | 42.13 | 59  | 0.24 | down |
| A0A034VFW9 | Uncharacterized protein (Fragment)                               | 50113  | 443  | 24.83 | 7   | 0.23 | down |
| A0A034VR52 | Procollagen-lysine,2-oxoglutarate 5-dioxygenase 1                | 85847  | 743  | 24.23 | 18  | 0.23 | down |
| A0A034VIH5 | Protein lap4 (Fragment)                                          | 83204  | 783  | 17.50 | 9   | 0.23 | down |
| A0A034WJ51 | Nucleosomal histone kinase 1                                     | 70264  | 637  | 13.66 | 7   | 0.23 | down |
| A0A034V413 | Nesprin-1                                                        | 915393 | 7973 | 19.68 | 119 | 0.23 | down |
| A0A034V975 | Uncharacterized protein                                          | 75107  | 674  | 30.42 | 18  | 0.22 | down |

|            |                                                                                    |        |      |       |    |      |      |
|------------|------------------------------------------------------------------------------------|--------|------|-------|----|------|------|
| A0A034V1E0 | Cell surface glycoprotein 1                                                        | 139929 | 1257 | 15.27 | 17 | 0.21 | down |
| A0A034VYW9 | Contactin                                                                          | 158548 | 1393 | 25.20 | 27 | 0.21 | down |
| A0A034VKE6 | Bifunctional methylenetetrahydrofolate dehydrogenase/cyclohydrolase, mitochondrial | 34038  | 316  | 32.59 | 8  | 0.21 | down |
| A0A034VW09 | Protein Skeletor, isoforms B/C                                                     | 82875  | 741  | 29.82 | 14 | 0.21 | down |
| A0A034WY02 | Pyridoxine-5'-phosphate oxidase                                                    | 28409  | 245  | 24.08 | 7  | 0.21 | down |
| A0A034V5M7 | Uncharacterized protein (Fragment)                                                 | 107664 | 923  | 18.09 | 15 | 0.20 | down |
| A0A034VY88 | Protein hu-li tai shao                                                             | 76611  | 698  | 69.63 | 35 | 0.20 | down |
| A0A034WTE5 | Trans-1,2-dihydrobenzene-1,2-diol dehydrogenase                                    | 37022  | 332  | 35.24 | 13 | 0.20 | down |
| A0A034WKG7 | Epidermal retinol dehydrogenase 2                                                  | 35786  | 317  | 3.47  | 1  | 0.20 | down |
| A0A034VCF3 | Elongation factor 1-alpha                                                          | 45374  | 414  | 64.25 | 22 | 0.20 | down |
| A0A034UZS9 | PDZ and LIM domain protein Zasp                                                    | 52978  | 495  | 22.22 | 9  | 0.19 | down |
| A0A034WI29 | Protein lin-7-like protein B                                                       | 21479  | 195  | 28.72 | 5  | 0.19 | down |
| A0A034WM22 | Multiple inositol polyphosphate phosphatase 1                                      | 54124  | 467  | 13.70 | 6  | 0.19 | down |
| A0A034V5Q1 | Ras suppressor protein 1 (Fragment)                                                | 15927  | 138  | 39.86 | 5  | 0.19 | down |
| A0A034W1E0 | Lachesin                                                                           | 41651  | 377  | 23.61 | 6  | 0.19 | down |
| A0A034VDJ6 | Putative epidermal cell surface receptor                                           | 118741 | 1070 | 8.69  | 7  | 0.19 | down |
| A0A034VUS9 | Dihydropyrimidine dehydrogenase (NADP(+))                                          | 113562 | 1047 | 5.83  | 5  | 0.19 | down |
| A0A034WWI9 | Ejaculatory bulb-specific protein 3                                                | 14702  | 127  | 22.05 | 3  | 0.18 | down |
| A0A034WGR6 | Uncharacterized protein                                                            | 26306  | 231  | 38.53 | 6  | 0.18 | down |
| A0A034VIA8 | Cytochrome P450 4g1 (Fragment)                                                     | 55770  | 488  | 22.95 | 10 | 0.18 | down |
| A0A034VJ94 | Glucose dehydrogenase (Acceptor)                                                   | 68918  | 620  | 11.77 | 6  | 0.18 | down |
| A0A034WT83 | Alpha-tocopherol transfer-like protein                                             | 33631  | 287  | 19.86 | 4  | 0.17 | down |
| A0A034VZF3 | Putative RNA-binding protein 15B                                                   | 56628  | 507  | 24.65 | 13 | 0.17 | down |
| Q86QQ0     | Glutathione S-transferase                                                          | 23756  | 209  | 37.32 | 6  | 0.17 | down |
| A0A034V2D5 | Neurogenic locus notch-like protein 1 (Fragment)                                   | 446774 | 4167 | 1.46  | 5  | 0.17 | down |
| A0A034VSX0 | Phosphate-regulating neutral endopeptidase                                         | 79759  | 683  | 22.69 | 13 | 0.16 | down |
| A0A034VYF9 | Paramyosin, long form                                                              | 102321 | 879  | 53.70 | 41 | 0.16 | down |
| A0A034WEH8 | SH3 domain-binding glutamic acid-rich protein-like protein (Fragment)              | 38305  | 346  | 16.18 | 5  | 0.16 | down |
| A0A034VA84 | Uncharacterized protein                                                            | 57231  | 502  | 22.91 | 10 | 0.16 | down |
| A0A034VTB7 | Uncharacterized protein                                                            | 47334  | 421  | 42.76 | 12 | 0.16 | down |
| A0A034VTK3 | Chitinase-like protein Idgf5                                                       | 48605  | 432  | 27.31 | 9  | 0.16 | down |
| A0A034VPA5 | Heterogeneous nuclear ribonucleoprotein Q (Fragment)                               | 47111  | 417  | 21.34 | 9  | 0.15 | down |

|            |                                                                                               |        |      |       |    |      |      |
|------------|-----------------------------------------------------------------------------------------------|--------|------|-------|----|------|------|
| A0A034VDP0 | Obscurin (Fragment)                                                                           | 70619  | 631  | 30.74 | 13 | 0.15 | down |
| A0A034VRQ6 | Protein held out wings                                                                        | 39076  | 356  | 37.64 | 11 | 0.15 | down |
| A0A034WL14 | RING finger protein unkempt (Fragment)                                                        | 69020  | 604  | 12.91 | 5  | 0.15 | down |
| A0A034VWI9 | General odorant-binding protein 99a (Fragment)                                                | 20372  | 176  | 18.18 | 4  | 0.15 | down |
| A0A034WVT6 | Membrane metallo-endopeptidase-like 1 (Fragment)                                              | 82524  | 714  | 22.13 | 14 | 0.15 | down |
| A0A034WRI9 | Sarcocystatin-A                                                                               | 13543  | 125  | 47.20 | 6  | 0.15 | down |
| A0A034UZB9 | Sushi, von Willebrand factor type A, EGF and pentraxin domain-containing protein 1 (Fragment) | 127179 | 1152 | 7.46  | 6  | 0.14 | down |
| A0A034V3K5 | CUB and sushi domain-containing protein 1 (Fragment)                                          | 96461  | 887  | 14.99 | 10 | 0.14 | down |
| A0A034VE41 | Twitchin (Fragment)                                                                           | 556499 | 4978 | 23.54 | 86 | 0.14 | down |
| A0A034VJJ7 | LIM and SH3 domain protein Lasp (Fragment)                                                    | 22613  | 198  | 28.79 | 7  | 0.14 | down |
| A0A034W9N3 | Heterogeneous nuclear ribonucleoprotein 87F                                                   | 39189  | 368  | 40.22 | 18 | 0.14 | down |
| A0A034WAI7 | Non-specific serine/threonine protein kinase                                                  | 64369  | 571  | 16.81 | 7  | 0.14 | down |
| A0A034WML8 | Protein takeout                                                                               | 30874  | 269  | 20.07 | 4  | 0.14 | down |
| A0A034V520 | Uncharacterized protein                                                                       | 65301  | 610  | 16.89 | 10 | 0.14 | down |
| A0A034WSA4 | Methionine adenosyltransferase 2 subunit beta                                                 | 42268  | 372  | 22.85 | 6  | 0.14 | down |
| A0A034W4D3 | L-xylulose reductase                                                                          | 25972  | 241  | 28.63 | 7  | 0.14 | down |
| A0A034WI17 | ATP-binding cassette sub-family A member 3                                                    | 36412  | 320  | 15.31 | 4  | 0.14 | down |
| A0A034V2S6 | Uncharacterized protein                                                                       | 105991 | 944  | 10.70 | 7  | 0.14 | down |
| A0A034W6R3 | Tissue inhibitor of metalloproteases                                                          | 23428  | 210  | 15.71 | 5  | 0.14 | down |
| A0A034W8L1 | Flotillin-2                                                                                   | 46568  | 425  | 43.53 | 17 | 0.13 | down |
| A0A034WCQ3 | Carbonic anhydrase 15 (Fragment)                                                              | 39936  | 350  | 9.71  | 3  | 0.13 | down |
| A0A034VUS5 | Integrin-linked protein kinase                                                                | 50786  | 448  | 32.37 | 14 | 0.13 | down |
| A0A034W6I6 | Amidophosphoribosyltransferase                                                                | 57877  | 532  | 14.85 | 7  | 0.13 | down |
| A0A034VND6 | Tropomyosin-1, isoforms 33/34 (Fragment)                                                      | 32457  | 282  | 48.58 | 20 | 0.13 | down |
| A0A034VQZ0 | Zinc finger protein 512B                                                                      | 44855  | 427  | 26.23 | 7  | 0.13 | down |
| W6A0Y6     | Interferon-inducible double stranded RNA-dependent protein kinase activator A                 | 32936  | 292  | 17.81 | 4  | 0.13 | down |
| A0A034WP07 | Attacin-A                                                                                     | 25021  | 239  | 72.80 | 14 | 0.13 | down |
| I1T1H2     | Heat shock protein 20                                                                         | 18932  | 170  | 67.65 | 10 | 0.13 | down |
| A0A034V5I2 | Muscle M-line assembly protein unc-89 (Fragment)                                              | 213521 | 1922 | 17.90 | 27 | 0.13 | down |
| A0A034V7Q2 | Protein yellow (Fragment)                                                                     | 29702  | 261  | 31.42 | 6  | 0.13 | down |
| A0A034VKK9 | Alcohol dehydrogenase (NADP(+))                                                               | 36548  | 324  | 38.89 | 13 | 0.13 | down |
| A0A034VWH3 | Myosin regulatory light chain 2                                                               | 23610  | 222  | 52.70 | 10 | 0.12 | down |

|            |                                                          |        |      |       |    |      |      |
|------------|----------------------------------------------------------|--------|------|-------|----|------|------|
| A0A034VC57 | Peroxidasin-like protein                                 | 155580 | 1384 | 11.49 | 13 | 0.12 | down |
| A0A034V8W7 | Cytochrome P450 4g15                                     | 55074  | 484  | 23.76 | 10 | 0.11 | down |
| A0A034V4U6 | Integrin alpha-PS2 (Fragment)                            | 132072 | 1205 | 13.03 | 13 | 0.11 | down |
| A0A034WR79 | Uncharacterized protein                                  | 24755  | 214  | 59.35 | 13 | 0.11 | down |
| A0A034WHU4 | Delta-1-pyrroline-5-carboxylate synthase                 | 83870  | 773  | 19.79 | 13 | 0.11 | down |
| A0A034V1Z3 | Atlastin (Fragment)                                      | 91611  | 791  | 48.93 | 37 | 0.11 | down |
| A0A034VDB5 | Protein lap4 (Fragment)                                  | 101687 | 915  | 20.11 | 14 | 0.11 | down |
| A0A034VQ98 | Arylphorin subunit C223 (Fragment)                       | 47837  | 407  | 1.97  | 1  | 0.11 | down |
| A0A034WGA0 | Kin of IRRE-like protein 2 (Fragment)                    | 68865  | 620  | 5.64  | 4  | 0.11 | down |
| A0A034VR22 | Galectin                                                 | 20799  | 179  | 22.35 | 4  | 0.11 | down |
| A0A034W237 | Esterase B1                                              | 64331  | 566  | 14.49 | 6  | 0.10 | down |
| A0A034VPE5 | Tropomyosin-1, isoforms 9A/A/B (Fragment)                | 21903  | 188  | 69.68 | 19 | 0.10 | down |
| A0A034WAU8 | Uncharacterized protein                                  | 73989  | 755  | 7.81  | 4  | 0.10 | down |
| A0A034WAX0 | Collagen alpha-1(XV) chain                               | 124401 | 1184 | 8.53  | 10 | 0.10 | down |
| A0A034VHE3 | Gamma-glutamyltranspeptidase 1                           | 79367  | 738  | 14.63 | 10 | 0.09 | down |
| A0A034VSE8 | Serrate RNA effector molecule-like protein               | 113786 | 997  | 19.16 | 17 | 0.09 | down |
| A0A034WF27 | TPPP family protein CG4893                               | 21493  | 201  | 40.30 | 7  | 0.09 | down |
| A0A034V519 | Endoplasmic reticulum metallopeptidase 1 (Fragment)      | 33550  | 293  | 13.99 | 4  | 0.09 | down |
| A0A034W4R7 | Alpha,alpha-trehalose-phosphate synthase (UDP-forming) A | 91999  | 813  | 33.46 | 24 | 0.09 | down |
| A0A034VHH3 | Laminin subunit alpha-1 (Fragment)                       | 188941 | 1677 | 10.26 | 14 | 0.09 | down |
| A0A034WS42 | Histone H4                                               | 11382  | 103  | 65.05 | 15 | 0.08 | down |
| A0A034V4T6 | Fasciclin-2 (Fragment)                                   | 57857  | 520  | 45.19 | 17 | 0.08 | down |
| A0A034VAC8 | Uncharacterized protein                                  | 95118  | 885  | 8.93  | 8  | 0.08 | down |
| A0A034VI82 | Tropomodulin                                             | 43782  | 386  | 34.97 | 10 | 0.08 | down |
| A0A034VQI8 | Uncharacterized protein (Fragment)                       | 72191  | 683  | 33.82 | 17 | 0.08 | down |
| A0A034W3W2 | Regucalcin                                               | 32384  | 296  | 42.91 | 12 | 0.08 | down |
| A0A034VIV7 | Uncharacterized protein (Fragment)                       | 15284  | 132  | 12.88 | 2  | 0.08 | down |
| A0A034V2U0 | Protein 4.1-like protein                                 | 185190 | 1703 | 57.37 | 82 | 0.07 | down |
| A0A034VQR8 | Troponin T, skeletal muscle                              | 45988  | 384  | 39.32 | 22 | 0.07 | down |
| A0A034VJG4 | Neurotactin                                              | 95358  | 871  | 9.87  | 6  | 0.07 | down |
| A0A034VSZ7 | Uncharacterized protein                                  | 26073  | 229  | 47.16 | 13 | 0.07 | down |
| A0A034VE17 | Uncharacterized protein                                  | 27887  | 240  | 26.67 | 6  | 0.07 | down |
| A0A034VCC3 | Filamin-B (Fragment)                                     | 124654 | 1130 | 5.93  | 7  | 0.07 | down |
| A0A034VZ11 | Uncharacterized protein (Fragment)                       | 21843  | 231  | 27.71 | 5  | 0.07 | down |
| A0A034VR92 | Tropomyosin-2                                            | 32743  | 284  | 57.04 | 17 | 0.06 | down |
| A0A034W4Q0 | Larval cuticle protein A2B (Fragment)                    | 18617  | 180  | 73.89 | 17 | 0.06 | down |
| A0A034WSV2 | Lamin-C                                                  | 70077  | 622  | 56.27 | 37 | 0.06 | down |

|            |                                                                                 |        |      |       |    |      |      |
|------------|---------------------------------------------------------------------------------|--------|------|-------|----|------|------|
| A0A034VUV3 | Lamin Dm0                                                                       | 69746  | 617  | 71.64 | 46 | 0.06 | down |
| A0A034VT34 | Angiopoietin-4                                                                  | 52090  | 454  | 20.04 | 7  | 0.06 | down |
| A0A034VIW3 | Homer protein-like protein 2                                                    | 42349  | 389  | 19.02 | 6  | 0.06 | down |
| A0A034VXK4 | Uncharacterized protein (Fragment)                                              | 44748  | 431  | 59.63 | 16 | 0.06 | down |
| A0A034W9Y1 | Larval cuticle protein A2B                                                      | 24482  | 250  | 92.40 | 19 | 0.06 | down |
| A0A034VII9 | Inhibitor of growth protein                                                     | 44693  | 413  | 13.56 | 4  | 0.06 | down |
| A0A034VU29 | Regucalcin                                                                      | 39454  | 351  | 64.96 | 26 | 0.05 | down |
| A0A034WHZ8 | Uncharacterized protein (Fragment)                                              | 53199  | 464  | 21.77 | 12 | 0.05 | down |
| A0A034VM08 | Uncharacterized protein                                                         | 62881  | 556  | 59.71 | 40 | 0.05 | down |
| A0A034V442 | Protein no-on-transient A                                                       | 78331  | 691  | 34.15 | 23 | 0.05 | down |
| A0A034WFT6 | Uncharacterized protein                                                         | 19920  | 195  | 59.49 | 14 | 0.05 | down |
| A0A034WXP8 | Uncharacterized protein                                                         | 16783  | 153  | 9.15  | 2  | 0.04 | down |
| A0A034VWF5 | Basement membrane-specific heparan sulfate proteoglycan core protein (Fragment) | 102363 | 922  | 34.27 | 29 | 0.04 | down |
| A0A034V3B3 | Arylphorin subunit A4 (Fragment)                                                | 140432 | 1224 | 45.92 | 55 | 0.04 | down |
| A0A034WSW4 | Larval cuticle protein 8                                                        | 11478  | 104  | 22.12 | 2  | 0.04 | down |
| A0A034V5B7 | Cuticle protein 19                                                              | 16513  | 147  | 17.01 | 2  | 0.04 | down |
| A0A034VQS9 | Mobility group protein 1A                                                       | 12648  | 113  | 39.82 | 7  | 0.04 | down |
| A0A034WL03 | Development-specific 25 kDa protein                                             | 28860  | 259  | 69.50 | 19 | 0.04 | down |
| A0A034W585 | Larval cuticle protein A3A                                                      | 14397  | 138  | 75.36 | 17 | 0.04 | down |
| A0A034V3D6 | J domain-containing protein                                                     | 19631  | 177  | 70.62 | 15 | 0.03 | down |
| A0A034WXX0 | Histone H1                                                                      | 24996  | 240  | 30.83 | 11 | 0.03 | down |
| A0A034VYM4 | Larval serum protein 1 gamma chain (Fragment)                                   | 92074  | 773  | 31.31 | 27 | 0.03 | down |
| A0A034UX56 | Trehalose 6-phosphate phosphatase                                               | 31189  | 274  | 81.75 | 25 | 0.03 | down |
| A0A034VC00 | Collagen alpha-1(IV) chain                                                      | 185541 | 1833 | 13.04 | 21 | 0.03 | down |
| A0A034W7C2 | Uncharacterized protein                                                         | 26739  | 235  | 43.83 | 10 | 0.03 | down |
| A0A034WJH9 | Uncharacterized protein                                                         | 37316  | 332  | 6.93  | 2  | 0.03 | down |
| A0A034W347 | Uncharacterized protein                                                         | 23274  | 224  | 8.48  | 1  | 0.03 | down |
| A0A034V6N3 | High mobility group protein Z                                                   | 12805  | 112  | 33.04 | 5  | 0.02 | down |
| A0A034WJQ4 | Fat-body protein 1 (Fragment)                                                   | 58417  | 511  | 48.53 | 31 | 0.02 | down |
| A0A034VBG9 | Uncharacterized protein                                                         | 23773  | 229  | 65.07 | 16 | 0.02 | down |

**Table S4.** Proteins highly abundant in 6- and 9-day-old ovaries compared to 1-day-old ovaries of *Bactrocera dorsalis*.

| Accession Number | Annotation                                           | Protein Length | Sequence Coverage | Peptides | Ov-6/Ov-1      | Ov-9/Ov-1       | Ov-9/Ov-6 <sup>a, b</sup> |
|------------------|------------------------------------------------------|----------------|-------------------|----------|----------------|-----------------|---------------------------|
| A0A034WHP3       | Vitelline membrane protein Vm26Aa                    | 114            | 82.46             | 16       | ↑ 35.99 ± 3.19 | ↑ 35.57 ± 1.05  | 0.99 ± 0.15 b             |
| A0A034WY57       | Putative ATP-dependent RNA helicase me31b            | 457            | 77.46             | 46       | ↑ 29.41 ± 2.41 | ↑ 32.45 ± 8.44  | ↑ 1.64 ± 0.24 a           |
| A0A034VQJ3       | Vitellogenin-1                                       | 436            | 83.26             | 82       | ↑ 26.95 ± 1.34 | ↑ 29.72 ± 2.42  | 1.4 ± 0.02 b              |
| A0A034WRE4       | 60S ribosomal protein L30                            | 111            | 60.36             | 9        | ↑ 26.93 ± 0.51 | ↑ 23.9 ± 3.95   | 0.73 ± 0.07 b             |
| A0A034WWC1       | General odorant-binding protein 99b                  | 143            | 49.65             | 10       | ↑ 26.43 ± 3.09 | ↑ 19.36 ± 11.46 | 0.8 ± 0.11 b              |
| Q8T7E3           | Vitellogenin 1                                       | 436            | 83.26             | 77       | ↑ 23.51 ± 3.1  | ↑ 21.25 ± 11.65 | 0.93 ± 0.04 b             |
| A0A034VP94       | 40S ribosomal protein S12                            | 139            | 84.17             | 16       | ↑ 22.03 ± 1.71 | ↑ 15.62 ± 3.41  | ↓ 0.66 ± 0.01 a           |
| A0A034W432       | Cytochrome P450 306a1                                | 545            | 40.92             | 19       | ↑ 20.86 ± 2.93 | ↑ 15.43 ± 6     | ↓ 0.67 ± 0 a              |
| A0A034V196       | Protein disulfide-isomerase                          | 135            | 51.85             | 6        | ↑ 20.18 ± 1.58 | ↑ 23.15 ± 1.28  | 1.34 ± 0.21 b             |
| A0A034WNR3       | 46 kDa FK506-binding nuclear protein                 | 180            | 28.89             | 4        | ↑ 19.46 ± 4.11 | ↑ 19.57 ± 8.2   | 1 ± 0.15 b                |
| A0A034W6L5       | Importin-7                                           | 1048           | 37.6              | 31       | ↑ 17.87 ± 1.85 | ↑ 14.03 ± 2.7   | 0.73 ± 0.12 b             |
| A0A034VVFV2      | 6-phosphogluconate dehydrogenase, decarboxylating    | 481            | 63.2              | 27       | ↑ 16.85 ± 0.85 | ↑ 15.02 ± 4.58  | 1 ± 0.19 b                |
| I1SWI8           | Heat shock protein 60                                | 573            | 77.66             | 47       | ↑ 15.44 ± 0.78 | ↑ 12.15 ± 2.23  | 0.81 ± 0.04 b             |
| A0A034V6V9       | Importin-4                                           | 1087           | 42.23             | 40       | ↑ 14.62 ± 1.49 | ↑ 13.56 ± 3.1   | 1.05 ± 0.16 b             |
| A0A034VJ67       | Protein cup                                          | 1173           | 22.25             | 24       | ↑ 14.35 ± 0.54 | ↑ 13.94 ± 1.59  | 1.03 ± 0.12 b             |
| A0A034VV64       | Eukaryotic translation initiation factor 3 subunit A | 1126           | 34.46             | 37       | ↑ 13.06 ± 2.83 | ↑ 7.47 ± 4.55   | ↓ 0.51 ± 0 a              |
| A0A034VE18       | Heat shock protein 23                                | 170            | 78.82             | 15       | ↑ 12.97 ± 1.84 | ↑ 29.02 ± 8.22  | ↑ 3.59 ± 0.02 a           |
| A0A034VR21       | Protein bicaudal C                                   | 899            | 26.25             | 15       | ↑ 12.51 ± 0.31 | ↑ 9.06 ± 2.5    | 0.72 ± 0.04 b             |
| A0A034VXK9       | Aspartate aminotransferase                           | 376            | 76.86             | 26       | ↑ 12.49 ± 0.75 | ↑ 10.59 ± 4.02  | 0.98 ± 0.17 b             |
| A0A034V1Z6       | Valine--tRNA ligase                                  | 1054           | 39.75             | 36       | ↑ 11.94 ± 3.05 | ↑ 11.89 ± 5.67  | 1.05 ± 0.15 b             |
| A0A034VMA5       | ATP-binding cassette sub-family F member 2           | 610            | 27.7              | 17       | ↑ 11.71 ± 0.72 | ↑ 10.91 ± 2.25  | 0.94 ± 0.16 b             |
| A0A034W4L6       | Lipid storage droplets surface-binding protein 2     | 353            | 61.47             | 20       | ↑ 11.61 ± 0.62 | ↑ 11.82 ± 1.96  | 1.1 ± 0.2 b               |

|            |                                                         |      |       |    |   |              |                |                 |
|------------|---------------------------------------------------------|------|-------|----|---|--------------|----------------|-----------------|
| A0A034W0T2 | Inosine-5'-monophosphate dehydrogenase                  | 534  | 35.96 | 12 | ↑ | 11.42 ± 1.58 | ↑ 13.26 ± 3.8  | 1.24 ± 0.23 b   |
| A0A034W2M7 | Elongation factor 1-gamma                               | 438  | 58.68 | 31 | ↑ | 11.41 ± 2.71 | ↑ 10.04 ± 4.76 | 0.96 ± 0.18 b   |
| A0A034WB81 | T-complex protein 1 subunit gamma                       | 543  | 71.27 | 41 | ↑ | 10.98 ± 2.22 | ↑ 9.44 ± 3.66  | 0.88 ± 0.13 b   |
| A0A034WWD8 | Exportin-1                                              | 1070 | 40.56 | 37 | ↑ | 10.85 ± 2.08 | ↑ 7.83 ± 3.84  | 0.7 ± 0.09 b    |
| A0A034V8K3 | RING finger protein 17                                  | 675  | 34.81 | 17 | ↑ | 10.68 ± 2.84 | ↑ 9.17 ± 5.08  | 0.79 ± 0.15 b   |
| A0A034WNG6 | Alanine--tRNA ligase, cytoplasmic                       | 967  | 50.26 | 38 | ↑ | 10.57 ± 1.43 | ↑ 11.06 ± 2.41 | 1.12 ± 0.06 b   |
| A0A034WKN9 | C2 domain-containing protein 3                          | 682  | 33.43 | 14 | ↑ | 10.37 ± 1.67 | ↑ 11.82 ± 3.74 | 1.29 ± 0.24 b   |
| A0A034WL96 | 60S ribosomal protein L13                               | 216  | 39.81 | 13 | ↑ | 10.27 ± 0.47 | ↑ 8.08 ± 0.39  | 0.76 ± 0.03 b   |
| A0A034VA13 | Eukaryotic initiation factor 4A                         | 403  | 67    | 28 | ↑ | 10.2 ± 0.86  | ↑ 8.02 ± 1.28  | 0.77 ± 0.11 b   |
| A0A034W486 | Protein transport protein Sec61 subunit alpha isoform 2 | 340  | 20.29 | 7  | ↑ | 10.07 ± 1.6  | ↑ 9.94 ± 3.59  | 0.97 ± 0.08 b   |
| A0A034WBZ8 | Putative serine protease K12H4.7                        | 517  | 39.65 | 19 | ↑ | 10.02 ± 0.39 | ↑ 13.4 ± 3.28  | ↑ 1.53 ± 0.21 a |
| A0A034WGZ4 | Elongation factor Ts, mitochondrial                     | 305  | 40.66 | 9  | ↑ | 9.68 ± 1.04  | ↑ 8.81 ± 1.01  | 0.93 ± 0.07 b   |
| A0A034VUT0 | Protein singed                                          | 509  | 31.43 | 13 | ↑ | 9.29 ± 1.67  | ↑ 12.32 ± 4.27 | 1.43 ± 0.09 b   |
| A0A034VYI4 | Tyrosine--tRNA ligase                                   | 523  | 65.01 | 29 | ↑ | 9.25 ± 1.3   | ↑ 7.46 ± 3.3   | 0.81 ± 0.17 b   |
| A0A034VZW3 | Transitional endoplasmic reticulum ATPase TER94         | 799  | 65.08 | 52 | ↑ | 9.2 ± 0.77   | ↑ 8.87 ± 3.86  | 1.14 ± 0.12 b   |
| A0A034VUQ7 | Glucose-6-phosphate 1-dehydrogenase                     | 527  | 52.56 | 22 | ↑ | 9.14 ± 0.14  | ↑ 7.12 ± 0.85  | 0.78 ± 0.13 b   |
| A0A034WJ52 | Eukaryotic translation initiation factor 4 gamma 1      | 1766 | 36.98 | 46 | ↑ | 9.09 ± 0.78  | ↑ 5.18 ± 2.11  | ↓ 0.56 ± 0.04 a |
| A0A034VLP4 | Transforming growth factor-beta-induced protein ig-h3   | 810  | 44.69 | 28 | ↑ | 9.02 ± 0.7   | ↑ 12 ± 4.83    | ↑ 1.65 ± 0.19 a |
| A0A034WCS4 | Dehydrogenase/reductase SDR family member 11            | 251  | 57.77 | 8  | ↑ | 8.92 ± 1.42  | ↑ 12.22 ± 4.56 | 1.5 ± 0.02 b    |
| A0A034W3A2 | Serine--tRNA ligase, cytoplasmic                        | 497  | 49.09 | 17 | ↑ | 8.51 ± 0.47  | ↑ 6.37 ± 2.77  | 0.81 ± 0.04 b   |
| A0A034VC07 | Thioredoxin reductase 1, mitochondrial                  | 493  | 71.4  | 28 | ↑ | 8.14 ± 1.09  | ↑ 12.01 ± 3.32 | ↑ 1.76 ± 0.03 a |
| A0A034VUM4 | Protein extra bases                                     | 420  | 46.19 | 23 | ↑ | 8 ± 0.54     | ↑ 5.47 ± 2.25  | 0.69 ± 0.11 b   |
| A0A034W1V3 | Diphthine synthase                                      | 280  | 47.14 | 9  | ↑ | 8 ± 0.7      | ↑ 12.99 ± 1.25 | ↑ 1.67 ± 0.07 a |
| A0A034VDY8 | Bifunctional glutamate/proline--tRNA ligase             | 1636 | 48.66 | 65 | ↑ | 7.8 ± 1.74   | ↑ 5.35 ± 2.86  | 0.68 ± 0 b      |



|            |                                                          |      |       |    |               |                |                 |
|------------|----------------------------------------------------------|------|-------|----|---------------|----------------|-----------------|
| A0A034VUA6 | 26S proteasome non-ATPase regulatory subunit 1           | 1017 | 52.51 | 45 | ↑ 7.42 ± 1.44 | ↑ 10.15 ± 3.44 | ↑ 1.58 ± 0.2 a  |
| A0A034WE93 | Glycine--tRNA ligase                                     | 679  | 50.07 | 31 | ↑ 6.98 ± 0.61 | ↑ 8.36 ± 1.99  | 1.33 ± 0.15 b   |
| A0A034V173 | Putative N-acetyltransferase san                         | 186  | 50.54 | 10 | ↑ 6.88 ± 0.62 | ↑ 7.46 ± 1.48  | 1.12 ± 0.09 b   |
| A0A034WPA4 | 28S ribosomal protein S35, mitochondrial                 | 332  | 31.02 | 8  | ↑ 6.87 ± 1.65 | ↑ 6.28 ± 3.28  | 0.89 ± 0.1 b    |
| A0A034V1D4 | CAD protein                                              | 999  | 28.43 | 25 | ↑ 6.61 ± 0.15 | ↑ 6.88 ± 1.03  | 1.06 ± 0.17 b   |
| A0A034VEZ1 | Glutamate synthase (NADH), amyloplastic                  | 2093 | 43.91 | 77 | ↑ 6.5 ± 1.71  | ↑ 6.03 ± 3.38  | 0.99 ± 0.19 b   |
| A0A034WKN7 | Methyltransferase-like protein 13                        | 675  | 33.63 | 19 | ↑ 6.45 ± 0.98 | ↑ 9.51 ± 2.55  | ↑ 1.53 ± 0.02 a |
| A0A034W4W3 | Transportin-1                                            | 886  | 27.2  | 18 | ↑ 6.4 ± 1.29  | ↑ 5.22 ± 2.18  | 0.79 ± 0.06 b   |
| A0A034VWI5 | Leucine-rich PPR motif-containing protein, mitochondrial | 1418 | 43.86 | 50 | ↑ 6.35 ± 0.52 | ↑ 5.75 ± 1.15  | 0.88 ± 0.06 b   |
| A0A034WM27 | Tubulin--tyrosine ligase-like protein 12                 | 641  | 29.49 | 17 | ↑ 6.28 ± 0.11 | ↑ 8.49 ± 1.11  | 1.43 ± 0.12 b   |
| A0A034WMH5 | 26S proteasome non-ATPase regulatory subunit 13          | 382  | 47.64 | 20 | ↑ 6.22 ± 0.99 | ↑ 8.79 ± 2.28  | 1.49 ± 0.01 b   |
| A0A034VBA8 | Isoleucine--tRNA ligase, cytoplasmic                     | 468  | 38.46 | 16 | ↑ 6.16 ± 0.75 | ↑ 5.54 ± 1.74  | 0.96 ± 0.17 b   |
| A0A034WM52 | Cullin-associated NEDD8-dissociated protein 1            | 1236 | 39.56 | 41 | ↑ 6.03 ± 0.99 | ↑ 8.77 ± 2.69  | ↑ 1.64 ± 0 a    |
| A0A034W3T2 | Serine/threonine-protein phosphatase 5                   | 544  | 40.26 | 19 | ↑ 6.02 ± 0.29 | ↑ 4.56 ± 0.57  | 0.78 ± 0.09 b   |
| A0A034VRQ0 | Translational activator GCN1                             | 1471 | 34.81 | 39 | ↑ 5.98 ± 1.51 | ↑ 4.44 ± 2.26  | 0.73 ± 0 b      |
| A0A034VMW4 | Uridine 5'-monophosphate synthase                        | 487  | 49.08 | 20 | ↑ 5.9 ± 0.64  | ↑ 4.35 ± 1.6   | 0.75 ± 0.16 b   |
| A0A034WF61 | Serine/threonine-protein phosphatase                     | 303  | 36.96 | 9  | ↑ 5.86 ± 0.93 | ↑ 6.1 ± 1.99   | 1.06 ± 0.08 b   |
| A0A034W9M9 | Cytosolic 10-formyltetrahydrofolate dehydrogenase        | 231  | 47.19 | 9  | ↑ 5.84 ± 0.65 | ↑ 3.49 ± 0.24  | ↓ 0.59 ± 0.07 a |
| A0A034UZ41 | Sepiapterin reductase                                    | 263  | 50.57 | 10 | ↑ 5.82 ± 0.33 | ↑ 8.2 ± 0.52   | 1.5 ± 0.04 b    |
| A0A034V3I0 | CAD protein                                              | 1234 | 20.83 | 17 | ↑ 5.81 ± 0.64 | ↑ 8.12 ± 1.65  | 1.47 ± 0.01 b   |
| A0A034WEU3 | Enoyl-CoA delta isomerase 2, mitochondrial               | 260  | 48.46 | 10 | ↑ 5.7 ± 0.08  | ↑ 9.78 ± 0.27  | ↑ 1.85 ± 0.01 a |
| A0A034WFJ7 | Putative elongator complex protein 1                     | 1025 | 26.63 | 23 | ↑ 5.69 ± 0.77 | ↑ 4.91 ± 1.84  | 0.87 ± 0.06 b   |
| A0A034VFZ9 | Kinetochore-associated protein 1                         | 770  | 26.36 | 17 | ↑ 5.67 ± 1.25 | ↑ 6.74 ± 2.88  | 1.22 ± 0.13 b   |
| A0A034VLF2 | Coatomer subunit beta                                    | 953  | 33.47 | 26 | ↑ 5.6 ± 0.25  | ↑ 6.38 ± 0.51  | 1.14 ± 0.08 b   |
| A0A034V3E5 | Nuclear pore complex protein Nup107                      | 899  | 34.59 | 25 | ↑ 5.55 ± 1.61 | ↑ 8.46 ± 4.5   | ↑ 1.67 ± 0 a    |

|            |                                                                      |      |       |    |               |               |                 |
|------------|----------------------------------------------------------------------|------|-------|----|---------------|---------------|-----------------|
| A0A034VAK1 | Heat shock protein 75 kDa, mitochondrial                             | 710  | 42.25 | 25 | ↑ 5.53 ± 0.63 | ↑ 5.33 ± 1.21 | 0.97 ± 0.1 b    |
| A0A034WIL4 | NADH dehydrogenase (Ubiquinone) iron-sulfur protein 2, mitochondrial | 473  | 43.97 | 18 | ↑ 5.45 ± 1.07 | ↑ 5.08 ± 2.41 | 0.94 ± 0.12 b   |
| A0A034VKN3 | Leucine--tRNA ligase, cytoplasmic                                    | 1182 | 45.18 | 44 | ↑ 5.32 ± 1.31 | ↑ 5.4 ± 2.71  | 1.02 ± 0.19 b   |
| A0A034WDL1 | NADH-ubiquinone oxidoreductase 75 kDa subunit, mitochondrial         | 736  | 46.47 | 29 | ↑ 5.25 ± 0.2  | ↑ 4.72 ± 0.27 | 0.86 ± 0.17 b   |
| A0A034WUW3 | UPF0160 protein MYG1, mitochondrial                                  | 385  | 37.14 | 12 | ↑ 5.24 ± 1.15 | ↑ 4.61 ± 2.03 | 0.86 ± 0.12 b   |
| A0A034V3F2 | 26S protease regulatory subunit 7                                    | 433  | 62.82 | 30 | ↑ 5.19 ± 0.57 | ↑ 7.91 ± 1.29 | ↑ 1.64 ± 0.18 a |
| A0A034W1C0 | Eukaryotic translation initiation factor 4 gamma 2                   | 942  | 27.81 | 19 | ↑ 5.18 ± 0.23 | ↑ 7.82 ± 1.63 | ↑ 1.64 ± 0.02 a |
| A0A034VKX9 | Alkylldihydroxyacetonephosphate synthase                             | 689  | 22.35 | 11 | ↑ 5.12 ± 0.67 | ↑ 5.15 ± 1.26 | 1.03 ± 0.08 b   |
| A0A034VM32 | CCR4-NOT transcription complex subunit 1                             | 1091 | 20.99 | 20 | ↑ 5.06 ± 1.42 | ↑ 5.82 ± 3.17 | 1.27 ± 0.25 b   |
| A0A034W6I8 | Exportin-2                                                           | 972  | 34.88 | 33 | ↑ 5.02 ± 1.3  | ↑ 5.94 ± 3.07 | 1.24 ± 0.24 b   |
| A0A034WU84 | Proteasome subunit alpha type                                        | 253  | 60.08 | 14 | ↑ 4.93 ± 0.37 | ↑ 6.49 ± 1.28 | 1.33 ± 0.09 b   |
| A0A034W3L0 | Ankyrin repeat and KH domain-containing protein mask                 | 507  | 29.98 | 11 | ↑ 4.84 ± 0.16 | ↑ 7.83 ± 0.62 | ↑ 1.68 ± 0.02 a |
| A0A034W9B6 | T-complex protein 1 subunit zeta                                     | 531  | 64.22 | 28 | ↑ 4.79 ± 0.6  | ↑ 4.09 ± 1.02 | 0.86 ± 0.13 b   |
| A0A034VJH4 | N-alpha-acetyltransferase 16, NatA auxiliary subunit                 | 878  | 33.94 | 28 | ↑ 4.76 ± 0.56 | ↑ 6.26 ± 1.57 | 1.33 ± 0.06 b   |
| A0A034WFC0 | ATP synthase subunit gamma                                           | 297  | 38.72 | 12 | ↑ 4.64 ± 0.42 | ↑ 6.08 ± 1.36 | 1.35 ± 0.1 b    |
| A0A034VH61 | Putative aminopeptidase W07G4.4                                      | 505  | 59.8  | 27 | ↑ 4.58 ± 0.59 | ↑ 7.23 ± 2.82 | ↑ 1.78 ± 0.09 a |
| A0A034W9F2 | Histone-lysine N-methyltransferase setd3                             | 534  | 36.14 | 17 | ↑ 4.57 ± 1.01 | ↑ 4.37 ± 1.91 | 0.95 ± 0.09 b   |
| A0A034WNJ6 | Heat shock 70 kDa protein cognate 5                                  | 679  | 55.23 | 34 | ↑ 4.47 ± 0.62 | ↑ 3.91 ± 0.94 | 0.89 ± 0.21 b   |
| A0A034WPS5 | COP9 signalosome complex subunit 1b                                  | 511  | 25.24 | 10 | ↑ 4.35 ± 0.68 | ↑ 6.12 ± 1.85 | ↑ 1.51 ± 0.22 a |
| A0A034WVA3 | Elongation factor Tu                                                 | 490  | 49.39 | 19 | ↑ 4.26 ± 0.6  | ↑ 3.53 ± 1.64 | 0.84 ± 0.21 b   |
| A0A034VBM4 | Trifunctional purine biosynthetic protein adenosine-3                | 1368 | 35.75 | 39 | ↑ 4.25 ± 0.48 | ↑ 3.96 ± 0.49 | 0.96 ± 0.2 b    |
| A0A034V9G7 | Eukaryotic translation initiation factor 5B                          | 1215 | 24.86 | 20 | ↑ 4.16 ± 0.39 | ↑ 4.36 ± 0.73 | 1.05 ± 0.22 b   |
| A0A034VGJ0 | Putative multidrug resistance-associated protein lethal(2)03659      | 513  | 21.64 | 9  | ↑ 4.15 ± 0.64 | ↑ 5.91 ± 1.77 | ↑ 1.56 ± 0.15 a |
| A0A034VX54 | Aspartate aminotransferase, cytoplasmic                              | 407  | 60.69 | 20 | ↑ 4.06 ± 0.43 | ↑ 4.41 ± 1.71 | 1.14 ± 0.16 b   |

|            |                                                                     |      |       |    |               |               |                 |
|------------|---------------------------------------------------------------------|------|-------|----|---------------|---------------|-----------------|
| A0A034WRS4 | 60S acidic ribosomal protein P2                                     | 113  | 74.34 | 9  | ↑ 4.04 ± 0.42 | ↑ 3.31 ± 0.87 | 0.82 ± 0.18 b   |
| A0A034V6T2 | Insulin-degrading enzyme                                            | 1048 | 24.43 | 24 | ↑ 3.94 ± 0.43 | ↑ 3.65 ± 1.61 | 0.99 ± 0.22 b   |
| A0A034VZH7 | 26S proteasome non-ATPase regulatory subunit 2                      | 911  | 48.74 | 35 | ↑ 3.93 ± 0.59 | ↑ 6.17 ± 1.55 | ↑ 1.65 ± 0.03 a |
| A0A034WU78 | Fumarate hydratase, mitochondrial                                   | 500  | 48    | 18 | ↑ 3.87 ± 0.38 | ↑ 5.49 ± 1.09 | 1.44 ± 0.07 b   |
| A0A034VAS4 | Acetyltransferase component of pyruvate dehydrogenase complex       | 503  | 39.36 | 14 | ↑ 3.79 ± 0.69 | ↑ 3.31 ± 1.25 | 0.9 ± 0.11 b    |
| A0A034WAN7 | Signal recognition particle 54 kDa protein                          | 508  | 36.22 | 12 | ↑ 3.76 ± 0.76 | ↑ 3.09 ± 1.32 | 0.8 ± 0.13 b    |
| A0A034W1H3 | Nuclear pore complex protein Nup93                                  | 809  | 38.32 | 27 | ↑ 3.68 ± 0.72 | ↑ 4 ± 1.52    | 1.19 ± 0.09 b   |
| A0A034V4D6 | DnaJ-like protein subfamily C member 13                             | 1936 | 21.02 | 31 | ↑ 3.66 ± 0.6  | ↑ 5 ± 1.41    | 1.42 ± 0 b      |
| A0A034VEP3 | 4-aminobutyrate aminotransferase, mitochondrial                     | 491  | 48.88 | 18 | ↑ 3.64 ± 0.09 | ↑ 5.56 ± 0.28 | ↑ 1.57 ± 0.01 a |
| A0A034WGV9 | Tryptophan--tRNA ligase, cytoplasmic                                | 428  | 29.44 | 11 | ↑ 3.46 ± 0.16 | ↑ 2.79 ± 0.31 | 0.82 ± 0.15 b   |
| A0A034WJS4 | Protein I(2)37Cc                                                    | 276  | 85.14 | 21 | ↑ 3.38 ± 0.28 | ↑ 4.24 ± 1.04 | 1.26 ± 0.2 b    |
| A0A034VNQ2 | Nuclear pore complex protein Nup85                                  | 677  | 36.63 | 19 | ↑ 3.38 ± 0.63 | ↑ 4.96 ± 1.77 | 1.47 ± 0.18 b   |
| A0A034VDF3 | Squamous cell carcinoma antigen recognized by T-cells 3             | 532  | 31.2  | 17 | ↑ 3.34 ± 0.17 | ↑ 2.88 ± 0.26 | 0.84 ± 0.08 b   |
| A0A034VXN0 | Short/branched chain specific acyl-CoA dehydrogenase, mitochondrial | 413  | 41.16 | 12 | ↑ 3.3 ± 0.04  | ↑ 2.94 ± 0.28 | 0.87 ± 0.05 b   |
| A0A034VG90 | Nuclear pore complex protein Nup133                                 | 1193 | 20.12 | 19 | ↑ 3.23 ± 0.6  | ↑ 3.54 ± 1.18 | 1.23 ± 0.04 b   |
| A0A034VQ24 | 60S ribosomal export protein NMD3                                   | 517  | 30.95 | 12 | ↑ 3.23 ± 0.21 | ↑ 3.61 ± 0.6  | 1.14 ± 0.18 b   |
| A0A034WIS7 | NADH dehydrogenase (Ubiquinone) flavoprotein 1, mitochondrial       | 480  | 44.37 | 17 | ↑ 3.1 ± 0.13  | ↑ 2.6 ± 0.1   | 0.88 ± 0.15 b   |
| A0A034W273 | Aspartate--tRNA ligase, cytoplasmic                                 | 539  | 49.91 | 25 | ↑ 3.07 ± 0.36 | ↑ 3.16 ± 0.72 | 1.07 ± 0.18 b   |
| A0A034WMX6 | Putative prefoldin subunit 5                                        | 160  | 76.88 | 10 | ↑ 3.07 ± 0.19 | ↑ 2.74 ± 0.15 | 0.91 ± 0.11 b   |
| A0A034WJH2 | Protein dpy-30-like protein                                         | 99   | 47.47 | 4  | ↑ 3.05 ± 0.22 | ↑ 3 ± 1.34    | 0.97 ± 0.13 b   |
| A0A034VS83 | Hypoxia up-regulated protein 1                                      | 957  | 42.11 | 30 | ↑ 2.93 ± 0.32 | ↑ 3.67 ± 0.83 | 1.28 ± 0.02 b   |
| A0A034WCD3 | NEDD8-activating enzyme E1 regulatory subunit                       | 522  | 29.12 | 13 | ↑ 2.92 ± 0.5  | ↑ 4.43 ± 1.47 | ↑ 1.53 ± 0.03 a |
| A0A034VTV6 | Glutaredoxin-related protein 5, mitochondrial                       | 169  | 29.59 | 4  | ↑ 2.56 ± 0.2  | ↑ 2.67 ± 0.44 | 1.04 ± 0.1 b    |
| A0A034W439 | Ubiquitin carboxyl-terminal hydrolase                               | 809  | 43.39 | 26 | ↑ 2.07 ± 0.2  | ↑ 3.26 ± 0.22 | ↑ 1.6 ± 0.05 a  |

|            |                 |     |       |    |               |               |               |
|------------|-----------------|-----|-------|----|---------------|---------------|---------------|
| A0A034WYF0 | Peroxiredoxin-2 | 233 | 51.93 | 11 | ↑ 2.03 ± 0.05 | ↑ 2.43 ± 0.22 | 1.18 ± 0.17 b |
|------------|-----------------|-----|-------|----|---------------|---------------|---------------|

Note: **a** means the fold change is  $\geq 1.5$ - or  $\leq 0.67$ -fold but at least one P-value  $\geq 0.05$ ; **b** means no difference of protein abundance; " ↑ " represents protein abundance up-regulation; " ↓ " represents protein abundance down-regulation; Proteins with no functional annotation, and also sequence coverage  $\leq 20\%$  were not listed in this table. Ov-1, ov-6 and ov-9 represent 1-, 6- and 9-day-old *B. dorsalis* ovary, respectively.

**Table S5.** Primers used for gene expression validation in developing ovaries of *Bactrocera dorsalis*.

| Protein ID | Annotation                                           | 5'-Forward-3'         | Reverse               |
|------------|------------------------------------------------------|-----------------------|-----------------------|
| A0A034WL03 | Development-specific 25 kDa protein                  | GTCAAGGCGGTATTGTGATG  | CCAACATACGATTGCTGACC  |
| A0A034W585 | Larval cuticle protein A3A                           | CATCAACACCGAGATTGACC  | AGTGAACCATCAGCATCCAA  |
| A0A034VWI9 | General odorant-binding protein 99a                  | AGATCCGCAATCAGGATGAC  | TCAGCCTTTACAGCGTCCTT  |
| A0A034V8W7 | Cytochrome P450 4g15                                 | CTACAAGTTGGCCGATCGTT  | CGTCACGTGGATCGTAAATG  |
| A0A034VVP8 | Serpin B9                                            | GTACAGTGCCGGTTCGATATG | CATGCGCTTCGACAAACTAT  |
| M1F3Z9     | Glutathione S-transferase omega-1                    | TCCCGAAGTACCACTCTTCC  | CATGCCAGGTTTATCACCAC  |
| A0A034UX56 | Trehalose 6-phosphate phosphatase                    | GAGTATCCATCGGGCAAGAA  | TTTCGATCAATTTGGCCTTC  |
| A0A034VR92 | Tropomyosin-2                                        | AGGTCGTCGGTAACTCGTTG  | CTTGTTAACGCCCAATTTCGT |
| A0A034WDZ9 | Importin-5                                           | GGTACGCTTGATGGTCCCAA  | GCTTCCGGTTCTGTGCCTAT  |
| A0A034V813 | Acetyl-CoA carboxylase                               | CAGTGTGCTTGCCCAATTCC  | GGAAGTGGCGACTCCACTTCA |
| A0A034VA48 | Prolyl 4-hydroxylase subunit a2                      | TACGCACAGAAGAGCACGAG  | CCACCTTGTTCTACGTCGCT  |
| A0A034V7N4 | Myosin heavy chain 95F                               | CGTTGGCGTTACAAGCACAA  | TGGGCGACACATCACTTTGA  |
| A0A034VH20 | Piwi-like protein                                    | GGGGCCGTGCAAATGTATTC  | AAACGAACCGGCATACCCTT  |
| A0A034VER3 | Eukaryotic translation initiation factor 3 subunit C | AAGTGACGCCGAAGAAGAGG  | CGACTCAGATTCCGACTCCG  |
| A0A034WHP3 | Vitelline membrane protein Vm26Aa                    | AAGCTGTGAACCTCCAGTCG  | TGAGCCGTATGATGGAGCAG  |
| A0A034WWC1 | General odorant-binding protein 99b                  | GGTACAAGCCGATGACTGGA  | CGTCTTCCGGCATATCGTCT  |
| Q8T7E3     | Vitellogenin 1                                       | GGAAGAACCCCAAACCCACA  | GCACCAACACCTTGTCCAAC  |
| A0A034W432 | Cytochrome P450 306a1                                | GATTCCGATATTGCCGAAGA  | CACTGCTCCAGATGTTCCAA  |
| I1SWI8     | Heat shock protein 60                                | CAATTGTTTGTCCGCAGCTA  | TTGAACCAGTTTTCACCAA   |
| A0A034V6V9 | Importin-4                                           | GATGACCACGGCTACCCAAA  | TGGTATTGGGTCGGTGATGC  |
| A0A034WSR6 | Defective chorion-1 protein                          | GCTGGCTTTATCGGTGTCCT  | AAAGACTGGCCCACGATCTG  |
| A0A034W812 | Importin subunit alpha                               | GCGCAAATCAAAGAAAGAGG  | ACGTTTCGCGACTTAGCATTT |
| A0A034VZV8 | Chorion peroxidase                                   | CTGGTGGCACTTTCGGTTAT  | TTATCATCAACGGCATTGGA  |

|            |                                         |                      |                       |
|------------|-----------------------------------------|----------------------|-----------------------|
| A0A034UZ33 | Importin subunit beta                   | CAGGAAGACGCATTCCTAGC | AGTTGCTTTAGAGCCCGACA  |
| A0A034V3F4 | Tripeptidyl-peptidase 2                 | TGCCGCACATCCCAAGTATT | AAGGCGGTGCGTATTCTCAA  |
| A0A034VV21 | Nuclear pore complex protein<br>Nup205  | ACGAGGAAAGGCAGATGAAA | ACGTTGAATCGAGTGGTTCC  |
| A0A034VMD8 | Cytoskeleton-associated protein 5       | GCGCTGCTAAATCTCATGGC | GCAGATCGGTGAATTCGGC   |
| A0A034W4A7 | Glutathione S-transferase 1-1           | CCCGAATTCCTGAAGATCAA | AATCGCCAAAGCAACCATAC  |
| A0A034WP50 | Chorion protein S36                     | AGTTGATCAGGGCGTCTACC | TTCAAGCTGAGTGGAGTTGG  |
| A0A034VUE5 | Myotubularin-related protein 14         | TGGCCAGTACATTTGTCGAT | TCTGATCGATTGCTGTAGG   |
| A0A034W787 | Juvenile hormone epoxide hydrolase<br>1 | CACTAGACCCGGTTTCGATT | ATCCAAC TGGCAATGTACGA |
| A0A034WCE7 | Insulin receptor                        | AAGTAATACACCGCCGGAAC | TCGGTAATCTCCTCCACCTC  |

---
